# Supplementary material
Source: PubMed Central journal article supplement (PMC3498537)

# Synthesis of Bridged Inside-Outside Bicyclic Ethers through Oxidative Transannular Cyclization Reactions

Xun Han and Paul E. Floreancig\*

*Department of Chemistry, University of Pittsburgh, Pittsburgh, Pennsylvania 15260*  
*[floean@pitt.edu](mailto:floean@pitt.edu)*

## Supporting Information

### *Table of Contents*

|                           |     |
|---------------------------|-----|
| General Information.....  | S1  |
| Experimental Section..... | S2  |
| References.....           | S14 |
| Crystal Data.....         | S15 |
| Spectral Data.....        | S24 |

### **General Information**

Proton ( $^1\text{H}$  NMR) and carbon ( $^{13}\text{C}$  NMR) nuclear magnetic resonance spectra were recorded on a Bruker Avance 300 spectrometer at 300 MHz and 75 MHz, a Bruker Avance 400 spectrometer at 400 MHz and 100 MHz, a Bruker Avance 500 spectrometer at 500 MHz and 125 MHz. The chemical shifts are reported in parts per million (ppm) on the delta ( $\delta$ ) scale. The solvent peak was used as a reference value, for  $^1\text{H}$  NMR:  $\text{CDCl}_3 = 7.27$  ppm,  $\text{C}_6\text{D}_6 = 7.16$  ppm, for  $^{13}\text{C}$  NMR:  $\text{CDCl}_3 = 77.23$ ,  $\text{C}_6\text{D}_6 = 128.4$  ppm. Data are reported as follows: (s = singlet; d = doublet; t = triplet; q = quartet; sept = septet; dd = doublet of doublets; ddd = doublet of doublet of doublets; dddd = doublet of doublet of doublet of doublet; td = triplet of doublets; dtd = doublet of triplet of doublets; br = broad). High resolution and low resolution mass spectra were recorded on a VG 7070 spectrometer. Infrared (IR) spectra were collected on a Mattson Cygnus 100 spectrometer. Samples for IR were prepared as a thin film on a NaCl plate by dissolving the compound in  $\text{CH}_2\text{Cl}_2$  and then evaporating the  $\text{CH}_2\text{Cl}_2$ . Tetrahydrofuran and diethyl ether were distilled from sodium and benzophenone. Methylene chloride was distilled under  $\text{N}_2$  from  $\text{CaH}_2$ . Analytical TLC was performed on E. Merck pre-coated (25 mm) silica gel 60F-254 plates. Visualization was done under UV (254 nm). Flash chromatography was done using ICN SiliTech 32-63 60 Å silica gel. Reagent grade ethyl acetate, diethyl ether, toluene and hexanes (commercial mixture) were purchased from EM Science and used as is for chromatography. All products in this manuscript are racemic mixtures but are drawn and named as single enantiomers to indicate their relative stereochemistry.

## Experimental Section

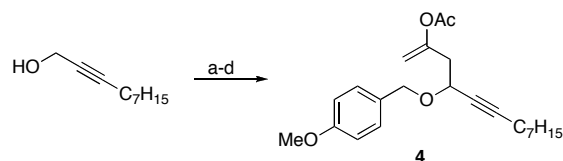

### Reagents and conditions

a)  $\text{SO}_3 \cdot \text{Py}$ , DMSO,  $\text{Et}_3\text{N}$ ,  $\text{CH}_2\text{Cl}_2$ , 79%. b)  $^1\text{Propargyl bromide}$ , Zn,  $\text{ICH}_2\text{CH}_2\text{I}$ , THF, sonication, 87%. c)  $^2\text{PMBOC}(\text{NH})\text{CCl}_3$ ,  $\text{La}(\text{OTf})_3$ , PhMe, 94%. d)  $^3\text{HOAc}$ ,  $[(p\text{-cymene})\text{RuCl}_2]_2$ ,  $\text{Fur}_3\text{P}$ ,  $\text{Na}_2\text{CO}_3$ , PhMe, 80 °C, 45%.

### Scheme 1. Synthesis of 4.

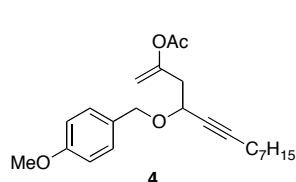

### 4-(4-methoxybenzyloxy)tridec-1-en-5-yn-2-yl acetate (4).

$^1\text{H NMR}$  (300 MHz,  $\text{CDCl}_3$ )  $\delta$  7.31-7.28 (m, 2H), 6.90-6.87 (m, 2H), 4.85 (s, 2H), 4.72 (d, 1H,  $J = 11.4$  Hz), 4.45 (d, 1H,  $J = 11.4$  Hz), 4.22 (ddt, 1H,  $J = 2.1, 6.3, 7.2$  Hz), 3.81 (s, 3H), 2.66 (dd, 2H,  $J = 5.4, 7.2$  Hz), 2.25 (td, 2H,  $J = 1.8, 6.9$  Hz), 2.05 (s, 3H), 1.59-1.49 (m, 2H), 1.44-1.29 (m, 8H), 0.90 (t, 3H,  $J = 6.9$  Hz);  $^{13}\text{C NMR}$  (100 MHz,  $\text{CDCl}_3$ )  $\delta$  169.3, 159.4, 152.3, 130.1, 129.9, 113.9, 104.3, 87.4, 78.2, 70.1, 66.1, 55.5, 40.6, 32.0, 29.0, 28.9, 22.8, 21.2, 18.9, 14.3; IR (neat) 2930, 2857, 1758, 1667, 1613, 1586, 1514, 1464, 1369, 1341, 1302, 1249, 1206, 1137, 1081, 1036, 965, 875, 823, 758, 721  $\text{cm}^{-1}$ ; HRMS (ESI)  $m/z$  calcd for  $\text{C}_{23}\text{H}_{32}\text{O}_4\text{Na}$   $[\text{M}+\text{Na}]^+$  395.2198, found 395.2190.

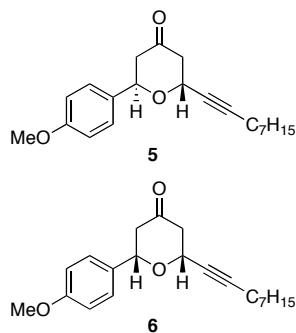

### Cyclization of 4 to form 5 and 6.

To a suspension of substrate 4 (152 mg, 0.408 mmol), 2,6-dichloropyridine (241 mg, 1.63 mmol), and 4 Å molecular sieves (304 mg) in anhydrous DCE (4 mL) was added DDQ (186 mg, 0.820 mmol) in one portion at rt. The mixture was stirred at rt for 1 h, and then was quenched by the addition of  $\text{NEt}_3$ . The mixture was loaded directly onto a short plug of silica gel and eluted with dichloromethane and EtOAc. The filtrate was concentrated and purified by flash chromatography (hexane:EtOAc, 30:1 to 15:1) to give the *trans* and *cis* products (97 mg, total mass, *trans/cis* = 2.8/1, 72% total yield). **5**:  $^1\text{H NMR}$  (300 MHz,  $\text{CDCl}_3$ )  $\delta$  7.35-7.30 (m, 2H), 6.94-6.89 (m, 2H), 5.26 (dd, 1H,  $J = 5.4, 8.4$  Hz), 5.18 (ddt, 1H,  $J = 1.5, 1.8, 6.6$  Hz), 3.82 (s, 3H), 2.81 (dd, 1H,  $J = 6.9, 14.1$  Hz), 2.64-2.61 (m, 2H), 2.53 (d, 1H,  $J = 14.1$  Hz), 2.23 (td, 2H,  $J = 2.1, 6.9$  Hz), 1.54-1.47 (m, 2H), 1.40-1.26 (m, 8H), 0.89 (t, 3H,  $J = 6.9$  Hz);  $^{13}\text{C NMR}$  (100 MHz,  $\text{CDCl}_3$ )  $\delta$  205.3, 159.7, 132.8, 127.7, 114.2, 90.6, 76.6, 73.7, 65.8, 55.5, 49.4, 47.6, 31.9, 29.0, 29.0, 28.7, 22.8, 18.9, 14.3; IR (neat) 2929, 2856, 1724, 1613, 1515, 1463, 1367, 1334, 1304, 1248, 1177, 1104, 1054, 1035, 946, 829  $\text{cm}^{-1}$ ; HRMS (ESI)  $m/z$  calcd for  $\text{C}_{21}\text{H}_{29}\text{O}_3$   $[\text{M}]^+$  329.2117, found 329.2116.

**6**:  $^1\text{H NMR}$  (300 MHz,  $\text{CDCl}_3$ )  $\delta$  7.35-7.29 (m, 2H), 6.93-6.88 (m, 2H), 4.58 (dd, 1H,  $J = 3.3, 10.8$  Hz), 4.53 (ddt, 1H,  $J = 1.8, 3.3, 11.1$  Hz), 3.81 (s, 3H), 2.80-2.54 (m, 4H), 2.23 (td, 2H,  $J = 2.1, 7.2$  Hz), 1.55-1.47 (m, 2H), 1.38-1.26 (m, 8H), 0.89 (t, 3H,  $J = 6.9$  Hz);  $^{13}\text{C NMR}$  (100 MHz,  $\text{CDCl}_3$ )  $\delta$  205.5, 159.8, 132.4, 127.7, 114.2, 88.0, 78.6, 67.8, 55.6, 53.6, 49.4, 48.5, 31.9, 29.0, 29.0, 28.6, 22.8, 19.0, 14.3; IR (neat) 2926, 2854, 1723, 1613, 1515, 1462, 1344, 1302, 1250, 1177, 1161, 1043, 952, 830  $\text{cm}^{-1}$ ; HRMS (ESI)  $m/z$  calcd for  $\text{C}_{21}\text{H}_{29}\text{O}_3$   $[\text{M}]^+$  329.2117, found 329.2108.

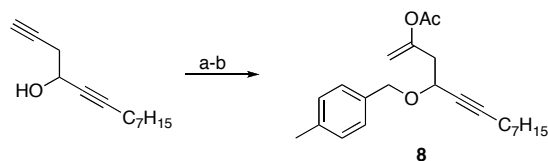

**Reagents and conditions**

a) NaH, THF, then p-methylbenzyl bromide, Bu<sub>4</sub>NI, 99% b) HOAc, [(p-cymene)RuCl<sub>2</sub>]<sub>2</sub>, Fur<sub>3</sub>P, Na<sub>2</sub>CO<sub>3</sub>, PhMe, 80 °C, 58%.

**Scheme 2.** Synthesis of **8**.

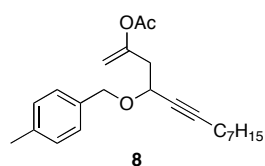

**4-(4-methylbenzyloxy)tridec-1-en-5-yn-2-yl acetate (8).**

<sup>1</sup>H NMR (400 MHz, CDCl<sub>3</sub>) δ 7.25 (d, 2H, *J* = 8.0 Hz), 7.15 (d, 2H, *J* = 8.0 Hz), 4.85 (s, 2H), 4.74 (d, 1H, *J* = 11.6), 4.48 (d, 1H, *J* = 11.6 Hz), 4.23 (t, 1H, *J* = 6.8 Hz), 2.66 (app dd, 2H, *J* = 6.8, 8.0 Hz), 2.35 (s, 3H), 2.24 (app dd, 2H, *J* = 5.6, 6.8 Hz), 2.05 (s, 3H), 1.56-1.49 (m, 2H), 1.42-1.37 (m, 2H), 1.34-1.26 (m, 6H), 0.90 (t, 3H, *J* = 6.8 Hz); <sup>13</sup>C NMR (125 MHz, CDCl<sub>3</sub>) δ 169.3, 152.3, 137.5, 135.0, 129.2, 128.4, 104.3, 87.5, 78.2, 70.3, 66.3, 40.6, 32.0, 29.0, 28.9, 22.9, 21.4, 21.3, 18.9, 14.3; IR (neat) 2928, 2857, 1759, 1668, 1458, 1433, 1369, 1340, 1204, 1083, 1020, 874, 803 cm<sup>-1</sup>; HRMS (ESI) *m/z* calcd for C<sub>23</sub>H<sub>32</sub>O<sub>3</sub>Na [M+Na]<sup>+</sup> 379.2249, found 379.2222.

**Cyclization of 8 to form 9 and 9'.**

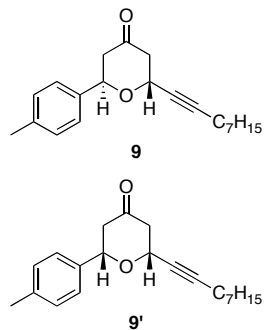

To a suspension of substrate **8** (29 mg, 0.081 mmol), 2,6-dichloropyridine (47 mg, 0.32 mmol), 4 Å molecular sieves (57 mg) in anhydrous DCE (1 mL) was added DDQ (36 mg, 0.16 mmol) in one portion at rt. The mixture was stirred at rt for 6 h, and then was quenched by the addition of NEt<sub>3</sub>. The mixture was loaded directly onto a short plug of silica gel and eluted with dichloromethane and EtOAc. The filtrate was concentrated and purified by flash chromatography to give both *trans* and *cis* products (18 mg, total mass, *trans/cis* = 3.3/1, 72% total yield). **9**: <sup>1</sup>H NMR (400 MHz, CDCl<sub>3</sub>) δ 7.28 (d, 2H, *J* = 8.4 Hz), 7.20 (d, 2H, *J* = 8.0

Hz), 5.27 (dd, 1H, *J* = 4.0, 10.0 Hz), 5.20 (ddt, 1H, *J* = 1.6, 2.4, 5.2 Hz), 2.89 (dd, 1H, *J* = 6.8, 14.0 Hz), 2.68-2.57 (m, 2H), 2.54 (dt, 1H, *J* = 1.6, 14.4 Hz), 2.36 (s, 3H), 2.23 (td, 2H, *J* = 2.0, 7.2 Hz), 1.55-1.47 (m, 2H), 1.39-1.33 (m, 2H), 1.31-1.28 (m, 6H), 0.89 (t, 3H, *J* = 6.8 Hz); <sup>13</sup>C NMR (100 MHz, CDCl<sub>3</sub>) δ 205.3, 138.1, 137.7, 129.5, 126.2, 90.7, 76.5, 73.9, 65.8, 49.5, 47.6, 32.0, 29.0, 29.0, 28.7, 22.8, 21.4, 18.9, 14.3; IR (neat) 2927, 2856, 1724, 1516, 1459, 1415, 1365, 1333, 1225, 1161, 1104, 1055, 1021, 945, 809 cm<sup>-1</sup>; HRMS (ESI) *m/z* calcd for C<sub>21</sub>H<sub>29</sub>O<sub>2</sub> [M]<sup>+</sup> 313.2168, found 313.2161.

**9'**: <sup>1</sup>H NMR (400 MHz, CDCl<sub>3</sub>) δ 7.29 (d, 2H, *J* = 8.0 Hz), 7.19 (d, 2H, *J* = 8.0 Hz), 4.60 (dd, 1H, *J* = 3.2, 10.8 Hz), 4.53 (ddt, 1H, *J* = 2.0, 2.8, 8.4 Hz), 2.76 (dd, 1H, *J* = 11.6, 14.4 Hz), 2.68-2.57 (m, 3H), 2.35 (s, 3H), 2.24 (td, 2H, *J* = 2.0, 7.2 Hz), 1.57-1.49 (m, 2H), 1.37-1.33 (m, 2H), 1.31-1.28 (m, 6H), 0.89 (t, 3H, *J* = 6.8 Hz); <sup>13</sup>C NMR (100 MHz, CDCl<sub>3</sub>) δ 205.5, 138.3, 137.3, 129.5, 126.2, 88.0, 78.8, 77.6, 67.8, 49.4, 48.5, 31.9, 29.0, 29.0, 28.6, 22.8, 21.4, 19.0, 14.3; IR (neat) 2927, 2856, 1724, 1516, 1460, 1380, 1344, 1305, 1246, 1161, 1135, 1054, 953, 811, 719 cm<sup>-1</sup>; HRMS (ESI) *m/z* calcd for C<sub>21</sub>H<sub>29</sub>O<sub>2</sub> [M]<sup>+</sup> 313.2168, found 313.2169.

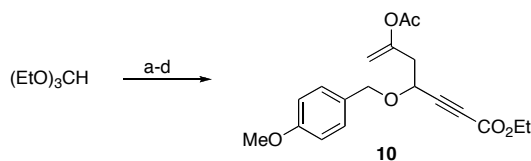

**Reagents and conditions**

a)<sup>4</sup> Ethyl propiolate, ZnI<sub>2</sub>, 50-100 °C, then HCO<sub>2</sub>H. b) Propargyl bromide, Zn, ICH<sub>2</sub>CH<sub>2</sub>I, THF, sonication. c) PMBOC(NH)CCl<sub>3</sub>, La(OTf)<sub>3</sub>, PhMe. d) HOAc, [(*p*-cymene)RuCl<sub>2</sub>]<sub>2</sub>, Fur<sub>3</sub>P, Na<sub>2</sub>CO<sub>3</sub>, PhMe, 80 °C, 4% over 4 steps.

**Scheme 3. Synthesis of 10.**

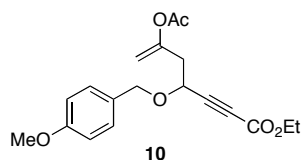

**Ethyl 6-acetoxy-4-(4-methoxybenzyloxy)hept-6-en-2-ynoate (10).**

<sup>1</sup>H NMR (500 MHz, CDCl<sub>3</sub>) δ 7.29 (d, 2H, *J* = 8.5 Hz), 6.89 (d, 2H, *J* = 9.0 Hz), 4.90 (d, 1H, *J* = 2.0 Hz), 4.89 (s, 1H), 4.75 (d, 1H, *J* = 11.0 Hz), 4.46 (d, 1H, *J* = 11.0 Hz), 4.33 (t, 1H, *J* = 6.5 Hz), 4.26 (q, 2H, *J* = 7.0 Hz), 3.81 (s, 3H), 2.73-2.72 (m, 2H), 2.06 (s, 3H), 1.34 (t, 3H, *J* = 7.0 Hz); <sup>13</sup>C NMR (125 MHz, CDCl<sub>3</sub>) δ 169.2, 159.7, 153.4, 150.9, 130.1, 129.1, 114.0, 105.3, 85.0, 78.2, 71.1, 65.5, 62.4, 55.5, 39.5, 21.2, 14.2; IR (neat) 2938, 2869, 2839, 2235, 1757, 1713, 1669, 1613, 1514, 1465, 1369, 1301, 1250, 1208, 1086, 1034, 882, 823, 752 cm<sup>-1</sup>; HRMS (ESI) *m/z* calcd for C<sub>19</sub>H<sub>22</sub>O<sub>6</sub>Na [M+Na]<sup>+</sup> 369.1314, found 369.1331.

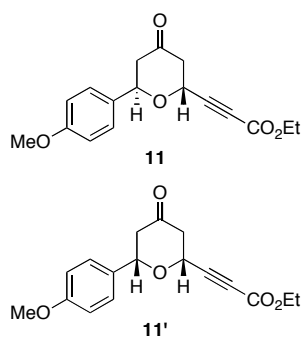

**Cyclization of 10 to form 11 and 11'.**

To a suspension of substrate **10** (56 mg, 0.16 mmol), 2,6-dichloropyridine (96 mg, 0.65 mmol) and 4 Å molecular sieves (113 mg) in anhydrous DCE (1.6 mL) was added DDQ (75 mg, 0.33 mmol) in one portion at rt. The mixture was stirred at rt for 9.5 h, and then was quenched by the addition of 0.1 mL NEt<sub>3</sub>. The mixture was loaded directly onto a short plug of silica gel and eluted with dichloromethane and EtOAc. The filtrate was concentrated and purified by flash chromatography (hexane:EtOAc, 10:1 to 8:1) to give the desired product (22 mg, total mass, *trans/cis* = 1.6/1, 45% total yield) as an inseparable mixture. Mixture of **11** and **11'**: <sup>1</sup>H NMR (400 MHz, CDCl<sub>3</sub>) δ 7.34-7.30 (m, 2H), 6.94-6.91 (m, 2H), 5.29 (dd, 0.6H, *J* = 2.0, 7.6 Hz), 5.22 (dd, 0.6H, *J* = 5.2, 9.2 Hz), 4.68 (dd, 0.4H, *J* = 3.2, 11.6 Hz), 4.62 (dd, 0.4H, *J* = 3.2, 10.8 Hz), 4.25 (q, 2H, *J* = 7.2 Hz), 3.82 (s, 1.8H), 3.82 (s, 1.2H), 2.94 (dd, 0.6H, *J* = 7.6, 14.8 Hz), 2.82 (dd, 0.4H, *J* = 12.0, 14.8 Hz), 2.75-2.62 (m, 3H), 1.33 (t, 1.8H, *J* = 6.8 Hz), 1.31 (t, 1.2H, *J* = 6.8 Hz); <sup>13</sup>C NMR (100 MHz, CDCl<sub>3</sub>) δ 203.6, 203.5, 160.0, 159.9, 153.1, 152.9, 131.8, 131.7, 127.7, 127.5, 114.3, 83.0, 82.6, 80.2, 79.1, 78.0, 74.8, 66.7, 64.9, 62.6, 62.6, 55.5, 49.2, 49.0, 46.5, 45.7, 14.2; IR (neat) 2980, 2934, 2840, 1716, 1643, 1613, 1587, 1516, 1464, 1367, 1337, 1302, 1252, 1178, 1152, 1059, 1033, 950, 833, 751 cm<sup>-1</sup>; HRMS (ESI) *m/z* calcd for C<sub>17</sub>H<sub>19</sub>O<sub>5</sub> [M]<sup>+</sup> 303.1232, found 303.1238.

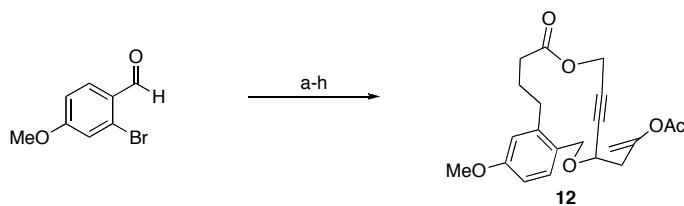

**Reagents and conditions**

a)<sup>5</sup> Methyl butenoate, 9-BBN, Pd(dppf)Cl<sub>2</sub>, K<sub>2</sub>CO<sub>3</sub>, DMF, 50 °C. b) NaBH<sub>4</sub>, MeOH, 0 °C, 80% (two steps). c) Cl<sub>3</sub>CCN, DBU, CH<sub>2</sub>Cl<sub>2</sub>, 55%. d) 2,6-Heptadiyn-1-ol, La(OTf)<sub>3</sub>, PhMe. e) *p*-TsOH, MeOH, 42% (two steps). f) LiOH, THF, MeOH, H<sub>2</sub>O. g) 2,4,6-Trichlorobenzoyl chloride, Et<sub>3</sub>N, THF, then DMAP, PhMe, 65 °C. h) HOAc, [Ru(*p*-cymene)Cl<sub>2</sub>]<sub>2</sub>, Fur<sub>3</sub>P, 1-decyne, Na<sub>2</sub>CO<sub>3</sub>, PhMe, 80 °C, 11% (three steps).

**Scheme 4.** Synthesis of **12**. Note: Compounds **14** and **16** were prepared through similar sequences.

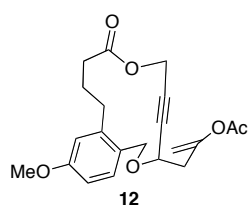

**Macrolactone substrate 12.**

<sup>1</sup>H NMR (300 MHz, CDCl<sub>3</sub>) δ 7.21 (d, 1H, *J* = 7.8 Hz), 6.74-6.70 (m, 2H), 4.89 (s, 1H), 4.85 (d, 1H, *J* = 1.5 Hz), 4.77 (d, 2H, *J* = 2.1), 4.76 (d, 1H, *J* = 9.6 Hz), 4.30 (tt, 1H, *J* = 2.1, 6.9 Hz), 4.17 (d, 1H, *J* = 9.3 Hz), 2.93-2.83 (m, 1H), 2.68 (dd, 1H, *J* = 6.9, 15.0), 2.62-2.37 (m, 3H), 2.08 (s, 3H), 2.00-1.88 (m, 2H); <sup>13</sup>C NMR (75 MHz, CDCl<sub>3</sub>) δ 173.3, 169.0, 160.0, 151.4, 143.1, 132.7, 127.1, 115.4, 111.2, 104.6, 84.8, 81.2, 68.0, 67.1, 55.2, 52.0, 39.4, 34.4, 31.2, 29.3, 21.1; IR (neat) 2922, 2852, 1745, 1667, 1611, 1579, 1503, 1461, 1439, 1368, 1324, 1258, 1215, 1132, 1110, 1044, 1025 cm<sup>-1</sup>; HRMS (ESI) *m/z* calcd for C<sub>21</sub>H<sub>24</sub>O<sub>6</sub>Na [M+Na]<sup>+</sup> 395.1471, found 395.1475.

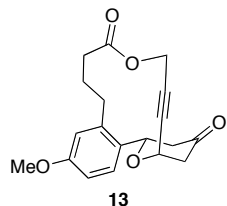

**Cyclization of 12 to form 13.**

To a suspension of macrocyclic lactone substrate **12** (46 mg, 0.12 mmol), 2,6-dichloropyridine (77 mg, 0.52 mmol) and 4 Å molecular sieves (92 mg) in anhydrous DCE (1.3 mL) was added DDQ (59 mg, 0.26 mmol) in one portion at rt. The mixture was stirred at rt for 4 h, and then was quenched by the addition of 10 drops of NEt<sub>3</sub>. The mixture was loaded directly onto a short plug of silica gel and eluted with dichloromethane and EtOAc. The filtrate was concentrated and purified by flash chromatography (hexane:EtOAc, 5:1 to 3:1) to give the desired product (29 mg, 72%). **13**: <sup>1</sup>H NMR (400 MHz, CDCl<sub>3</sub>) δ 7.34 (d, 1H, *J* = 8.4 Hz), 6.81 (dd, 1H, *J* = 2.8, 8.8 Hz), 6.76 (d, 1H, *J* = 2.8 Hz), 5.36 (dd, 1H, *J* = 2.0, 12.4 Hz), 5.10 (app dt, 1H, *J* = 1.2, 7.2 Hz), 4.84 (dd, 1H, *J* = 3.2, 15.2 Hz), 4.69 (dd, 1H, *J* = 1.6, 14.8 Hz), 3.81 (s, 3H), 2.98-2.81 (m, 3H), 2.62-2.49 (m, 4H), 2.40 (ddd, 1H, *J* = 3.6, 11.2, 12.4 Hz), 2.01-1.79 (m, 2H); <sup>13</sup>C NMR (100 MHz, CDCl<sub>3</sub>) δ 204.7, 172.6, 159.9, 142.5, 128.3, 127.4, 115.8, 111.8, 84.2, 82.6, 69.2, 65.5, 55.2, 51.7, 46.8, 46.2, 34.5, 31.4, 29.1; IR (neat) 2923, 2851, 1740, 1611, 1579, 1504, 1441, 1368, 1334, 1275, 1255, 1233, 1158, 1131, 1110, 1048, 1024, 996, 952, 818, 733 cm<sup>-1</sup>; HRMS (ESI) *m/z* calcd for C<sub>19</sub>H<sub>20</sub>O<sub>5</sub>Na [M+Na]<sup>+</sup> 351.1208, found 351.1199.

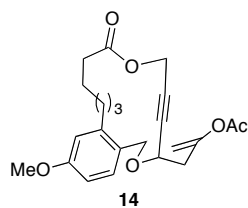

#### Macrolactone substrate 14.

$^1\text{H}$  NMR (400 MHz,  $\text{CDCl}_3$ )  $\delta$  7.23 (d, 1H,  $J = 8.8$  Hz), 6.72-6.69 (m, 2H), 4.91 (s, 1H), 4.88 (d, 1H,  $J = 1.6$  Hz), 4.84 (d, 1H,  $J = 10.4$  Hz), 4.79 (d, 2H,  $J = 2.0$  Hz), 4.36 (tt, 1H,  $J = 2.0, 6.4$  Hz), 4.33 (d, 1H,  $J = 10.6$  Hz), 3.79 (s, 3H), 2.77-2.71 (m, 2H), 2.65 (dd, 1H,  $J = 6.0, 14.8$  Hz), 2.60-2.52 (m, 1H), 2.42-2.38 (m, 2H), 2.09 (s, 3H), 1.78-1.72 (m, 2H), 1.65-1.49 (m, 4H);  $^{13}\text{C}$  NMR (100 MHz,  $\text{CDCl}_3$ )  $\delta$  173.0, 169.3, 159.6, 151.7, 143.5, 130.8, 127.6, 115.1, 110.9, 104.9, 84.4, 81.0, 68.6, 66.8, 55.4, 51.7, 39.9, 33.8, 33.1, 30.4, 28.8, 24.5, 21.3; IR (neat) 2923, 2853, 1745, 1667, 1610, 1579, 1502, 1462, 1369, 1325, 1259, 1209, 1135, 1111, 1067, 1032  $\text{cm}^{-1}$ ; HRMS (ESI)  $m/z$  calcd for  $\text{C}_{23}\text{H}_{28}\text{O}_6\text{Na}$   $[\text{M}+\text{Na}]^+$  423.1784, found 423.1768.

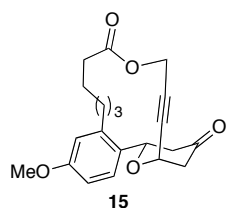

#### Cyclization of 14 to form 15.

To a suspension of macrolactone substrate **14** (32 mg, 0.08 mmol), 2,6-dichloropyridine (48 mg, 0.32 mmol), 4 Å molecular sieves (65 mg) in anhydrous DCE (0.85 mL) was added DDQ (37 mg, 0.16 mmol) in one portion at rt. The mixture was stirred at rt for 1 h, and then was quenched by the addition of 10 drops of  $\text{NEt}_3$ . The mixture was loaded directly onto a short plug of silica gel and eluted with dichloromethane and EtOAc. The filtrate was concentrated and purified by flash chromatography (hexane:EtOAc, 8:1 to 3:1) to give the desired product (23 mg, 81%). **15**:  $^1\text{H}$  NMR (400 MHz,  $\text{CDCl}_3$ )  $\delta$  7.40 (d, 1H,  $J = 8.8$  Hz), 6.80 (dd, 1H,  $J = 2.8, 8.4$  Hz), 6.71 (d, 1H,  $J = 2.8$  Hz), 5.43 (dd, 1H,  $J = 2.8, 11.6$  Hz), (app d, 1H,  $J = 6.8$  Hz), 4.83 (dd, 1H,  $J = 2.0, 15.2$  Hz), 4.72 (dd, 1H,  $J = 3.2, 15.6$  Hz), 3.80 (s, 3H), 2.92 (dd, 1H,  $J = 7.2, 14.4$  Hz), 2.73-2.52 (m, 5H), 2.39 (t, 2H,  $J = 6.4$  Hz), 1.81-1.75 (m, 1H), 1.73-1.57 (m, 3H), 1.53-1.46 (m, 2H);  $^{13}\text{C}$  NMR (100 MHz,  $\text{CDCl}_3$ )  $\delta$  204.9, 172.7, 159.7, 142.0, 130.0, 127.2, 115.0, 111.8, 83.2, 82.5, 70.7, 65.7, 55.4, 51.6, 49.1, 46.6, 33.7, 33.2, 30.7, 28.6, 24.4; IR (neat) 2934, 2861, 1739, 1610, 1580, 1503, 1458, 1371, 1333, 1266, 1229, 1158, 1113, 1056, 1023, 984, 947, 816, 731  $\text{cm}^{-1}$ ; HRMS (ESI)  $m/z$  calcd for  $\text{C}_{21}\text{H}_{24}\text{O}_5\text{Na}$   $[\text{M}+\text{Na}]^+$  379.1521, found 379.1543.

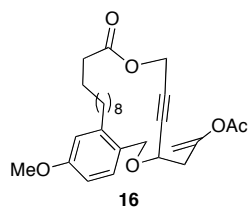

#### Macrolactone substrate 16

$^1\text{H}$  NMR (400 MHz,  $\text{CDCl}_3$ )  $\delta$  7.28 (d, 1H,  $J = 7.6$  Hz), 6.73-6.71 (m, 2H), 4.88 (d, 2H,  $J = 3.6$  Hz), 4.79 (d, 1H,  $J = 10.8$  Hz), 4.76 (s, 2H), 4.36 (d, 1H,  $J = 10.8$  Hz), 4.38-4.35 (m, 1H), 3.80 (s, 3H), 2.70 (dd, 2H,  $J = 7.2, 13.2$  Hz), 2.64 (dd, 2H,  $J = 6.8, 10.0$  Hz), 2.38 (t, 2H, 6.4 Hz), 2.06 (s, 3H), 1.72-1.68 (m, 2H), 1.62-1.58 (m, 2H), 1.38-1.26 (m, 12H);  $^{13}\text{C}$  NMR (100 MHz,  $\text{CDCl}_3$ )  $\delta$  173.4, 169.3, 159.5, 151.8, 143.4, 130.9, 127.7, 115.1, 111.1, 104.9, 85.2, 80.7, 68.4, 67.1, 55.4, 52.4, 40.2, 33.9, 33.2, 31.5, 29.2, 28.2, 27.8, 27.6, 27.5, 27.2, 24.5, 21.3; IR (neat) 2928, 2856, 1753, 1668, 1611, 1579, 1503, 1461, 1370, 1342, 1207, 1114, 1077, 1023, 875, 818  $\text{cm}^{-1}$ ; HRMS (ESI)  $m/z$  calcd for  $\text{C}_{28}\text{H}_{38}\text{O}_6\text{Na}$   $[\text{M}+\text{Na}]^+$  493.2566, found 493.2559.

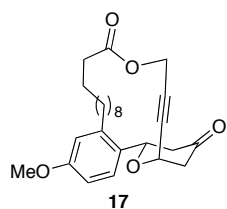

### Cyclization of **16** to form **17**.

To a suspension of macrolactone substrate **16** (50 mg, 0.11 mmol), 2,6-dichloropyridine (63 mg, 0.42 mmol) and 4 Å molecular sieves (100 mg) in anhydrous DCE (1.3 mL) was added DDQ (48 mg, 0.21 mmol) in one portion at rt. The mixture was stirred at rt for 40 min, and then was quenched by the addition of 10 drops of NEt<sub>3</sub>. The mixture was loaded directly onto a short plug of silica gel and eluted with dichloromethane and EtOAc. The filtrate was concentrated and purified by flash chromatography (hexane:EtOAc, 15:1 to 5:1) to give the desired product (30 mg, *trans/cis* = 6/1, 65% total yield; *cis* product has not been separated out from its *trans* isomer. *Trans/cis* ratio is based on integrating characteristic signals in the <sup>1</sup>H NMR spectrum.). **17**: <sup>1</sup>H NMR (400 MHz, CDCl<sub>3</sub>) δ 7.39 (d, 1H, *J* = 8.4 Hz), 6.80 (dd, 1H, *J* = 2.8, 8.4 Hz), 6.74 (d, 1H, *J* = 2.8 Hz), 5.47 (dd, 1H, *J* = 2.8, 11.2 Hz), 5.25 (d, 1H, *J* = 6.0 Hz), 4.80 (dd, 1H, *J* = 1.2, 16.0 Hz), 4.70 (dd, 1H, *J* = 2.0, 16.0 Hz), 3.81 (s, 3H), 2.94 (dd, 1H, *J* = 7.2, 14.0 Hz), 2.77-2.70 (m, 2H), 2.63-2.55 (m, 3H), 2.39 (t, 2H, *J* = 6.8 Hz), 1.72-1.58 (m, 4H), 1.41-1.26 (m, 12H); <sup>13</sup>C NMR (100 MHz, CDCl<sub>3</sub>) δ 204.9, 173.4, 159.6, 142.5, 129.8, 127.7, 115.3, 111.8, 83.6, 83.4, 70.6, 65.5, 55.5, 52.3, 48.9, 46.9, 33.7, 33.2, 31.8, 29.7, 28.3, 27.5, 27.2, 26.9, 26.2, 24.1; IR (neat) 2928, 2855, 1739, 1610, 1579, 1504, 1461, 1335, 1230, 1160, 1052, 946, 816, 732, 705 cm<sup>-1</sup>; C<sub>26</sub>H<sub>35</sub>O<sub>5</sub> [M]<sup>+</sup> 427.2484, found 427.2493.

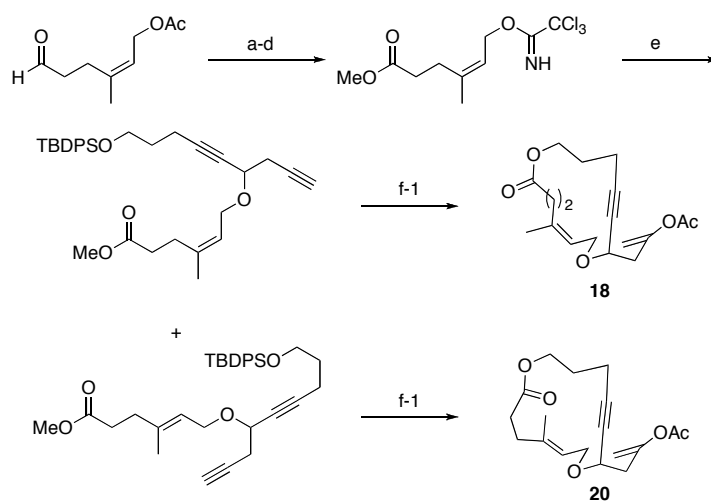

### Reagents and conditions

a) <sup>6</sup> NaClO<sub>2</sub>, NaH<sub>2</sub>PO<sub>4</sub>, 2-methyl-2-butene, <sup>t</sup>BuOH, H<sub>2</sub>O, -10 °C. b) K<sub>2</sub>CO<sub>3</sub>, MeOH. c) MeI, K<sub>2</sub>CO<sub>3</sub>, acetone. d) Cl<sub>3</sub>CCN, DBU, CH<sub>2</sub>Cl<sub>2</sub>, 29% (4 steps). e) 4,8-Nonadiyne-1,6-diol, TMSOTf, C<sub>6</sub>H<sub>12</sub>, 0 °C, 18% *Z*, 21% *E*. f) LiOH, THF, MeOH, H<sub>2</sub>O. g) Bu<sub>4</sub>NF, THF. h) <sup>7</sup> 2-Chloro-1-methylpyridinium iodide, Et<sub>3</sub>N, CH<sub>3</sub>CN, reflux. i) HOAc, [Ru(*p*-cymene)Cl<sub>2</sub>]<sub>2</sub>, 1-decyne, Na<sub>2</sub>CO<sub>3</sub>, PhMe, 80 °C, 11% **18**, 21% **20** (four steps).

### Scheme 5. Synthesis of **18** and **20**.

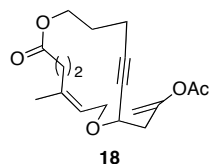

### Macrolactone substrate **18**.

<sup>1</sup>H NMR (400 MHz, CDCl<sub>3</sub>) δ 5.44 (td, 1H, *J* = 1.2, 7.6 Hz), 4.88 (s, 1H), 4.85 (d, 1H, *J* = 1.6 Hz), 4.30-4.17 (m, 4H), 3.95 (dd, 1H, *J* = 7.2, 10.4 Hz), 2.62 (app dd, 2H, *J* = 4.8, 6.4 Hz), 2.59-2.49 (m, 3H), 2.47-2.43 (m, 2H), 2.42-2.35 (m, 1H), 2.14 (s, 3H), 1.90-1.84 (m, 2H), 1.79 (s, 3H); <sup>13</sup>C NMR (100 MHz, CDCl<sub>3</sub>) δ 173.3, 169.3, 152.2, 142.6, 121.8, 104.3, 86.4, 79.3, 66.1, 64.6, 64.0, 40.4, 34.7, 28.2, 26.8, 23.4, 21.3, 17.2; IR (neat) 2924, 2856, 1755, 1733, 1667, 1433, 1369,

1338, 1249, 1203, 1065, 1019, 969, 879  $\text{cm}^{-1}$ ; HRMS (ESI)  $m/z$  calcd for  $\text{C}_{18}\text{H}_{24}\text{O}_5\text{Na}$   $[\text{M}+\text{Na}]^+$  343.1521, found 343.1566.

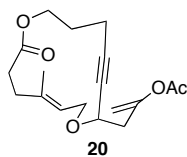

#### Macrolactone substrate **20**.

$^1\text{H}$  NMR (400 MHz,  $\text{CDCl}_3$ )  $\delta$  5.55 (td, 1H,  $J = 1.2, 6.4$  Hz), 4.85 (s, 1H), 4.84 (d, 1H,  $J = 1.6$  Hz), 4.37 (dd, 1H,  $J = 6.0, 14.0$  Hz), 4.27-4.12 (m, 3H), 4.02 (dd, 1H,  $J = 6.0, 14.0$  Hz), 2.62-2.56 (m, 2H), 2.53-2.47 (m, 2H), 2.46-2.42 (m, 2H), 2.38-2.35 (m, 2H), 2.14 (s, 3H), 1.79 (p, 2H,  $J = 6.0$  Hz), 1.66 (s, 3H);  $^{13}\text{C}$  NMR (100 MHz,  $\text{CDCl}_3$ )  $\delta$  173.6, 169.3, 152.2, 134.8, 124.0, 104.4, 84.1, 81.9, 67.8, 67.5, 62.3, 40.8, 35.1, 32.5, 25.0, 21.3, 16.1, 15.4; IR (neat) 2924, 2856, 1734, 1669, 1574, 1433, 1368, 1343, 1206, 1069, 1022, 969, 882  $\text{cm}^{-1}$ ; HRMS (ESI)  $m/z$  calcd for  $\text{C}_{18}\text{H}_{24}\text{O}_5\text{Na}$   $[\text{M}+\text{Na}]^+$  343.1521, found 343.1515.

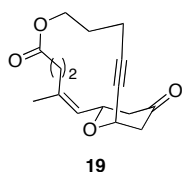

#### Cyclization reaction of **18** to form **19**.

To a suspension of macrolactone substrate **18** (36 mg, 0.11 mmol), 2,6-dichloropyridine (100 mg, 0.674 mmol),  $\text{LiClO}_4$  (3.0 mg, 0.028 mmol), 4 Å molecular sieves (72 mg) in anhydrous DCE (1.4 mL) was added DDQ (76 mg, 0.34 mmol) in one portion at rt. The mixture was stirred at rt for 23 hs, and then 26 mg DDQ (1.0 eq.) was added. The resulting mixture was stirred for 3 h at rt, and then was quenched with  $\text{NEt}_3$ . The black mixture was loaded directly onto a short plug of silica gel and eluted with dichloromethane and EtOAc. The filtrate was concentrated and purified by flash chromatography (hexane:EtOAc, 10:1 to 6:1) to give the desired *trans*-product (17 mg, 54%).  $^1\text{H}$  NMR (400 MHz,  $\text{CDCl}_3$ )  $\delta$  5.31 (dd, 1H,  $J = 1.2, 8.8$  Hz), 5.08 (app dd, 1H,  $J = 1.2, 7.6$  Hz), 4.95 (td, 1H,  $J = 5.6, 8.8$  Hz), 4.28-4.23 (m, 1H), 4.14-4.09 (m, 1H), 2.78 (dd, 1H,  $J = 7.2, 14.0$  Hz), 2.57-2.32 (m, 9H), 1.90-1.83 (m, 2H), 1.80 (d, 3H,  $J = 1.2$  Hz);  $^{13}\text{C}$  NMR (100 MHz,  $\text{CDCl}_3$ )  $\delta$  205.4, 172.8, 142.7, 125.4, 89.1, 77.8, 68.5, 65.9, 64.4, 48.2, 47.0, 34.7, 29.1, 26.2, 23.5, 16.9; IR (neat) 2922, 2852, 1731, 1436, 1380, 1332, 1249, 1154, 1106, 1051, 937, 893  $\text{cm}^{-1}$ ; HRMS (ESI)  $m/z$  calcd for  $\text{C}_{16}\text{H}_{20}\text{O}_4\text{Na}$   $[\text{M}+\text{Na}]^+$  299.1259, found 299.1248.

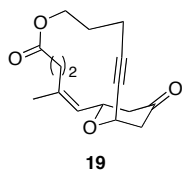

#### Cyclization reaction of **20** to form **19**.

To a suspension of macrolactone substrate **20** (20 mg, 0.062 mmol), 2,6-dichloropyridine (55 mg, 0.37 mmol),  $\text{LiClO}_4$  (1.7 mg, 0.016 mmol), 4 Å molecular sieves (40 mg) in anhydrous DCE (0.8 mL) was added DDQ (42 mg, 0.19 mmol) in one portion at rt. The mixture was stirred at rt for 43 hours and then was quenched with  $\text{NEt}_3$ . The black mixture was loaded directly onto a short plug of silica gel and eluted with dichloromethane and EtOAc. The filtrate was concentrated and purified by flash chromatography to give the *trans*-product **19** (6.0 mg, 35%).



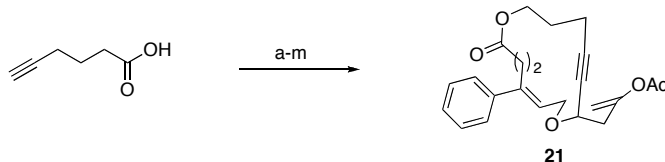

#### Reagents and conditions

a) (3-Methyloxetan-3-yl)methanol<sup>8</sup>, DCC, DMAP, CH<sub>2</sub>Cl<sub>2</sub>. b) BF<sub>3</sub>·OEt<sub>2</sub>, CH<sub>2</sub>Cl<sub>2</sub>, 0 °C, 71% (two steps). c) <sup>n</sup>BuLi, THF, -78 °C, then (CH<sub>2</sub>O)<sub>n</sub>, 0 °C, 85%. d) HOAc, H<sub>2</sub>O, THF. e) K<sub>2</sub>CO<sub>3</sub>, MeOH, 85% (two steps). f)<sup>9</sup> Dimethyl(thiophen-2-yl)silane, H<sub>2</sub>PtCl<sub>6</sub>, THF, 50 °C, 45% (+ 42% regioisomer). g)<sup>10</sup> PhI, Bu<sub>4</sub>NF, Pd<sub>2</sub>(dba)<sub>3</sub>, THF, 76%. h) Cl<sub>3</sub>CCN, DBU, CH<sub>2</sub>Cl<sub>2</sub>, 92%. i) TMSOTf, 4,8-Nonadiyne-1,6-diol, C<sub>6</sub>H<sub>12</sub>, 0 °C, 41%. j) Bu<sub>4</sub>NF, THF, 78%. k) LiOH, THF, MeOH, H<sub>2</sub>O. l) 2-Chloro-1-methylpyridinium iodide, Et<sub>3</sub>N, CH<sub>3</sub>CN, reflux 46% (two steps). m) HOAc, 1-decyne, [Ru(*p*-cymene)Cl<sub>2</sub>]<sub>2</sub>, Fur<sub>3</sub>P, Na<sub>2</sub>CO<sub>3</sub>, PhMe, 80 °C, 53%.

**Scheme 6.** Synthesis of **21**.

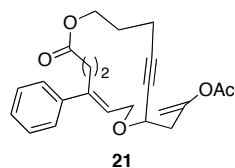

#### Macrolactone substrate **21**.

<sup>1</sup>H NMR (400 MHz, CDCl<sub>3</sub>) δ 7.39-7.25 (m, 5H), 5.82 (t, 1H, *J* = 6.4 Hz), 4.90 (s, 1H), 4.87 (d, 1H, *J* = 1.6 Hz), 4.39 (dd, 1H, *J* = 6.8, 12.0 Hz), 4.35-4.28 (m, 3H), 4.18 (dd, 1H, *J* = 6.8, 12.0 Hz), 2.68-2.61 (m, 4H), 2.59-2.43 (m, 2H), 2.40-2.28 (m, 2H), 2.13 (s, 3H), 1.96-1.84 (m, 2H), 1.81-1.64 (m, 2H); <sup>13</sup>C NMR (100 MHz, CDCl<sub>3</sub>) δ 174.2, 169.3, 152.1, 143.4, 141.6,

128.6, 127.6, 126.7, 125.2, 104.6, 85.4, 80.0, 66.2, 64.9, 63.5, 40.3, 33.5, 28.8, 25.8, 24.1, 21.3, 16.2; IR (neat) 2929, 1755, 1730, 1667, 1493, 1433, 1368, 1245, 1204, 1080, 1020, 964, 917, 880, 761 cm<sup>-1</sup>; HRMS (ESI) *m/z* calcd for C<sub>24</sub>H<sub>28</sub>O<sub>5</sub>Na [M+Na]<sup>+</sup> 419.1834, found 419.1841.

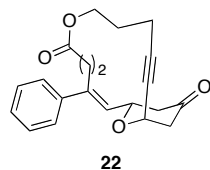

#### Cyclization reaction of **21** to form **22**.

To a suspension of macrolactone **21** (38 mg, 0.096 mmol), 2,6-dichloropyridine (57 mg, 0.38 mmol), LiClO<sub>4</sub> (3 mg, 0.03 mmol) and 4 Å molecular sieves (76 mg) in anhydrous DCE (1 mL) was added DDQ (44 mg, 0.19 mmol) in one portion at rt. The mixture was stirred at rt for 15 min, and then was quenched by with NEt<sub>3</sub>. The mixture was loaded directly onto a short plug of silica gel and eluted with dichloromethane and EtOAc. The filtrate was concentrated and purified by flash chromatography (hexane:EtOAc, 8:1 to 4:1) to give the desired product **22** (24 mg, 72%). **22**: <sup>1</sup>H NMR (400 MHz, CDCl<sub>3</sub>) δ 7.40-7.28 (m, 5H), 5.73 (d, 1H, *J* = 8.4 Hz), 5.14-5.10 (m, 2H), 4.37-4.24 (m, 2H), 2.83 (dd, 1H, *J* = 7.2, 14.0 Hz), 2.63 (td, 2H, *J* = 4.0, 7.6 Hz), 2.56-2.37 (m, 6H), 2.32-2.25 (m, 1H), 1.93-1.81 (m, 2H), 1.80-1.68 (m, 2H); <sup>13</sup>C NMR (100 MHz, CDCl<sub>3</sub>) δ 204.9, 173.6, 144.6, 141.2, 128.7, 128.0, 127.3, 126.9, 88.5, 78.3, 69.2, 65.9, 63.4, 48.2, 47.2, 33.9, 29.5, 25.8, 23.9, 16.1; IR (neat) 2926, 1726, 1493, 1444, 1358, 1334, 1246, 1227, 1157, 1112, 1047, 937, 887, 764 cm<sup>-1</sup>; HRMS (ESI) *m/z* calcd for C<sub>22</sub>H<sub>24</sub>O<sub>4</sub>Na [M+Na]<sup>+</sup> 375.1572, found 375.1584.

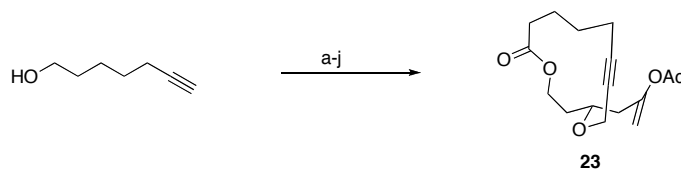

**Reagents and conditions**

- a) TBSCl, imidazole, CH<sub>2</sub>Cl<sub>2</sub>. b) <sup>t</sup>BuLi, THF, -78 °C, then (CH<sub>2</sub>O)<sub>n</sub>, 0 °C, 93% (two steps). c) CBr<sub>4</sub>, Ph<sub>3</sub>P, CH<sub>2</sub>Cl<sub>2</sub>, MeOH, 0 °C. d) 5-Heptyne-1,3-diol 1-TBDPS ether, NaH, Bu<sub>4</sub>NI, THF, 66%. e) PPTs, MeOH, CH<sub>2</sub>Cl<sub>2</sub>. f) Dess-Martin periodinane, NaHCO<sub>3</sub>, CH<sub>2</sub>Cl<sub>2</sub>, 55% (two steps). g) NaClO<sub>2</sub>, NaH<sub>2</sub>PO<sub>4</sub>, 2-methyl-2-butene, <sup>t</sup>BuOH, H<sub>2</sub>O, -10 °C. h) Bu<sub>4</sub>NF, THF. i) 2-Chloro-1-methylpyridinium iodide, Et<sub>3</sub>N, CH<sub>3</sub>CN, reflux. j) HOAc, [Ru(*p*-cymene)Cl<sub>2</sub>]<sub>2</sub>, 1-decyne, Na<sub>2</sub>CO<sub>3</sub>, PhMe, 80 °C, 35% (four steps).

**Scheme 7.** Synthesis of **23**. Note: Compounds **25** and **27** were prepared through similar sequences.

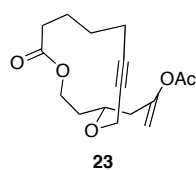

**Macrolactone substrate 23.**

<sup>1</sup>H NMR (400 MHz, CDCl<sub>3</sub>) δ 4.85 (d, 1H, *J* = 1.2 Hz), 4.83 (s, 1H), 4.30-4.19 (m, 2H), 4.14-4.05 (m, 3H), 2.58 (ddd, 1H, *J* = 2.0, 7.6, 14.4 Hz), 2.47 (t, 2H, *J* = 4.8 Hz), 2.37 (app dddd, 1H, *J* = 2.8, 5.6, 8.4, 17.2 Hz), 2.22-2.17 (m, 1H), 2.17 (s, 3H), 2.16-2.00 (m, 2H), 1.90 (ddt, 1H, *J* = 3.2, 12.0, 14.8 Hz), 1.83-1.76 (m, 1H), 1.74-1.67 (m, 2H), 1.51-1.44 (m, 1H); <sup>13</sup>C NMR (100 MHz, CDCl<sub>3</sub>) δ 173.8, 169.2, 153.0, 104.3, 86.0, 77.1, 69.6, 60.5, 56.8, 37.8, 35.0, 33.8, 27.7, 23.5, 21.3, 17.9; IR (neat) 2926, 2854, 1755, 1731, 1665, 1434, 1369, 1259, 1200, 1152, 1053 cm<sup>-1</sup>; HRMS (ESI) *m/z* calcd for C<sub>16</sub>H<sub>22</sub>O<sub>5</sub>Na [M+Na]<sup>+</sup> 317.1365, found 317.1365.

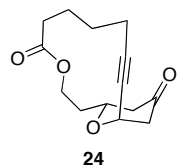

**Cyclization of 23 to form 24.**

To a suspension of macrolactone substrate **23** (177 mg, 0.60 mmol, **23**/regio-isomer = 8/1), 2,6-dichloropyridine (888 mg, 6.0 mmol), LiClO<sub>4</sub> (51 mg, 0.48 mmol), 4 Å molecular sieves (355 mg) in anhydrous DCE (7 mL) was added DDQ (817 mg, 3.60 mmol) in one portion at rt. The mixture was stirred at 50 °C for 41.5 h, and then 272 mg DDQ (1.20 mmol) and 19 mg LiClO<sub>4</sub> was added. The resulting mixture was stirred at the same temperature for 20.5 h, and then was quenched by the addition of 1.5 mL NEt<sub>3</sub>. The mixture was loaded directly onto a short plug of silica gel and eluted with dichloromethane and EtOAc. The filtrate was concentrated and purified by flash chromatography (hexane:EtOAc, 10:1 to 4:1) to give the desired product (49 mg, 36%) as colorless crystal. <sup>1</sup>H NMR (400 MHz, CDCl<sub>3</sub>) δ 5.09-5.07 (m, 1H), 4.62-4.55 (m, 1H), 4.39-4.33 (m, 1H), 4.06 (dt, 1H, *J* = 4.0, 10.8 Hz), 2.74 (dd, 1H, *J* = 8.0, 14.8 Hz), 2.49 (ddd, 1H, *J* = 3.2, 6.8, 14.0 Hz), 2.45 (dt, 1H, *J* = 1.2, 14.4 Hz), 2.42-2.37 (m, 2H), 2.33-2.18 (m, 2H), 2.04 (ddt, 1H, *J* = 2.0, 11.2, 16.8 Hz), 1.96-1.79 (m, 4H), 1.76-1.66 (m, 1H), 1.51-1.40 (m, 1H); <sup>13</sup>C NMR (125 MHz, CDCl<sub>3</sub>) δ 205.4, 173.2, 89.0, 77.8, 67.2, 65.7, 60.0, 48.4, 46.2, 35.2, 34.4, 28.1, 24.7, 18.8; IR (neat) 2921, 2851, 1724, 1704, 1334, 1258, 1230, 1152, 1109, 1057, 1026, 860, 780 cm<sup>-1</sup>; HRMS (ESI) *m/z* calcd for C<sub>14</sub>H<sub>18</sub>O<sub>4</sub>Na [M+Na]<sup>+</sup> 273.1103, found 273.1097.

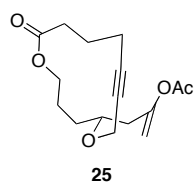

**Macrolactone substrate 25.**

<sup>1</sup>H NMR (400 MHz, CDCl<sub>3</sub>) δ 4.80 (s, 2H), 4.34 (ddd, 1H, *J* = 3.6, 5.2, 11.2 Hz), 4.28 (dt, 1H, *J* = 2.0, 16.4 Hz), 4.12 (td, 1H, *J* = 2.8, 10.4 Hz), 4.04 (dt, 1H, *J* = 2.0, 16.4 Hz), 3.84 (p, 1H, *J* = 6.0 Hz), 2.48-2.44 (m, 2H), 2.43-2.31 (m, 4H), 2.16 (s, 3H), 2.02-1.84 (m, 3H), 1.83-1.73 (m, 2H), 1.61-1.52 (m, 1H); <sup>13</sup>C NMR (100 MHz, CDCl<sub>3</sub>) δ 173.4, 169.3, 153.4, 103.9, 84.8, 78.8, 75.0, 64.1,

57.5, 38.2, 33.7, 31.1, 23.7, 21.9, 21.3, 18.4; IR (neat) 2929, 2855, 2032, 1962, 1754, 1732, 1666, 1574, 1436, 1369, 1201, 1159, 1069, 1019, 881  $\text{cm}^{-1}$ ; HRMS (ESI)  $m/z$  calcd for  $\text{C}_{16}\text{H}_{22}\text{O}_5\text{Na}$   $[\text{M}+\text{Na}]^+$  317.1365, found 317.1325.

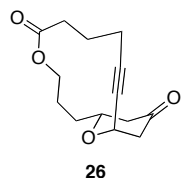

#### Cyclization of 25 to form 26.

To a suspension of macrolactone substrate **25** (36 mg, 0.12 mmol), 2,6-dichloropyridine (72 mg, 0.49 mmol),  $\text{LiClO}_4$  (3.9 mg, 0.037 mmol), 4 Å molecular sieves (72 mg) in anhydrous DCE (1.5 mL) was added DDQ (56 mg, 0.25 mmol) in one portion at rt. The mixture was stirred at rt for 24 h, and then another 56 mg DDQ was added. The resulting mixture was stirred for 53 h at 40 °C, then was quenched by the addition of  $\text{NEt}_3$ . The black mixture was loaded directly onto a short plug of silica gel and eluted with dichloromethane and EtOAc. The filtrate was concentrated and purified by flash chromatography to give the desired *trans* product **26** (11 mg, 36%). **26**:  $^1\text{H}$  NMR (400 MHz,  $\text{CDCl}_3$ )  $\delta$  5.06 (app d, 1H,  $J = 7.2$  Hz), 4.57 (ddd, 1H,  $J = 3.2, 4.8, 11.6$  Hz), 4.42 (ddt, 1H,  $J = 2.4, 10.4, 11.6$  Hz), 3.95 (td, 1H,  $J = 1.6, 11.2$  Hz), 2.73 (dd, 1H,  $J = 7.6, 14.4$  Hz), 2.52 (ddd, 1H,  $J = 2.8, 8.8, 16.8$  Hz), 2.14 (app d, 2H,  $J = 14.4$  Hz), 2.38-2.17 (m, 4H), 2.06-1.97 (m, 1H), 1.92-1.77 (m, 2H), 1.65-1.57 (m, 3H);  $^{13}\text{C}$  NMR (100 MHz,  $\text{CDCl}_3$ )  $\delta$  205.7, 173.8, 87.6, 78.6, 70.9, 67.0, 65.6, 49.2, 47.0, 35.5, 33.0, 23.3, 21.1, 18.8; IR (neat) 2922, 2852, 1727, 1554, 1452, 1390, 1341, 1230, 1196, 1159, 1110, 1052, 967, 910  $\text{cm}^{-1}$ ; HRMS (ESI)  $m/z$  calcd for  $\text{C}_{14}\text{H}_{19}\text{O}_4$   $[\text{M}]^+$  251.1283, found 251.1314.

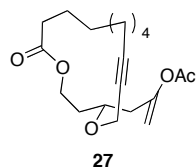

#### Macrolactone substrate 27.

$^1\text{H}$  NMR (400 MHz,  $\text{CDCl}_3$ )  $\delta$  4.84 (s, 2H), 4.30-4.14 (m, 4H), 4.04 (p, 1H,  $J = 6.0$  Hz), 2.47 (d, 2H,  $J = 5.6$  Hz), 2.34 (t, 2H,  $J = 6.8$  Hz), 2.29-2.28 (m, 2H), 2.14 (s, 3H), 1.91-1.82 (m, 2H), 1.78-1.65 (m, 2H), 1.57-1.49 (m, 4H), 1.44-1.33 (m, 4H);  $^{13}\text{C}$  NMR (100 MHz,  $\text{CDCl}_3$ )  $\delta$  174.1, 169.2, 152.8, 104.5, 86.9, 76.4, 70.7, 60.8, 55.9, 36.6, 33.9, 33.3, 27.4, 26.9, 26.5, 26.0, 24.0, 21.3, 18.2; IR (neat) 2930, 2857, 1756, 1733, 1666, 1435, 1369, 1199, 1065, 1022, 965, 878  $\text{cm}^{-1}$ ; HRMS (ESI)  $m/z$  calcd for  $\text{C}_{19}\text{H}_{29}\text{O}_5$   $[\text{M}]^+$  337.2015, found 337.1962.

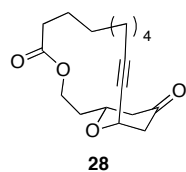

#### Cyclization of 27 to form 28.

To a suspension of macrolactone substrate **27** (30 mg, 0.090 mmol), 2,6-dichloropyridine (53 mg, 0.36 mmol),  $\text{LiClO}_4$  (2.8 mg, 0.027 mmol), 4 Å molecular sieves (60 mg) in anhydrous DCE (1 mL) was added DDQ (81 mg, 0.36 mmol) in one portion at rt. The mixture was stirred at 40 °C for 46 h, then was quenched by adding 3 drops of  $\text{NEt}_3$ . The mixture was loaded directly onto a short plug of silica gel and eluted with dichloromethane and EtOAc. The filtrate was concentrated and purified by flash chromatography (hexane:EtOAc, 10:1 to 4:1) to give both *trans*- and *cis*-products (12 mg total mass, *trans/cis* = 2/1, 46% total yield). **28**:  $^1\text{H}$  NMR (400 MHz,  $\text{CDCl}_3$ )  $\delta$  5.11 (dd, 1H,  $J = 1.6, 6.8$ ), 4.48 (app ddt, 1H,  $J = 2.4, 8.8, 13.6$  Hz), 4.26-4.17 (m, 2H), 2.80 (dd, 1H,  $J = 6.8, 13.6$  Hz), 2.49-2.43 (m, 2H), 2.34 (t, 2H,  $J = 6.8$  Hz), 2.32-2.29 (m, 2H), 2.21 (dd, 1H,  $J = 7.2, 14.0$  Hz), 2.04-1.96 (m, 1H), 1.90-1.82 (m, 1H), 1.71 (p, 2H,  $J = 6.8$  Hz), 1.51-1.44 (m, 4H), 1.41-1.28 (m, 4H);  $^{13}\text{C}$  NMR (100 MHz,  $\text{CDCl}_3$ )  $\delta$  205.0, 174.0, 90.0, 77.1, 68.3, 66.0, 59.7, 47.9, 47.8, 35.7, 33.6, 27.8, 26.8, 26.7, 26.0, 24.4, 18.0; IR (neat) 2929, 2857, 1729, 1459, 1337, 1226, 1187, 1147, 1097, 1053, 980, 932, 863  $\text{cm}^{-1}$ ; HRMS (ESI)  $m/z$  calcd for  $\text{C}_{17}\text{H}_{25}\text{O}_4$   $[\text{M}]^+$  293.1753, found 292.1720.

**28'**:  $^1\text{H}$  NMR (400 MHz,  $\text{CDCl}_3$ )  $\delta$  4.38-4.21 (m, 3H), 3.78 (ddt, 1H,  $J = 2.4, 9.2, 11.2$  Hz), 2.63-2.52 (m, 2H), 2.46-2.38 (m, 2H), 2.36-2.24 (m, 4H), 2.13-2.04 (m, 1H), 1.85-1.68 (m, 3H), 1.60-1.34 (m, 8H);  $^{13}\text{C}$  NMR (100 MHz,  $\text{CDCl}_3$ )  $\delta$  205.3, 174.4, 86.7, 78.8, 67.5, 62.1, 48.1, 47.7, 35.2, 33.7, 26.4, 25.7, 24.8, 24.5, 22.5, 17.9; HRMS (ESI)  $m/z$  calcd for  $\text{C}_{17}\text{H}_{24}\text{O}_4$   $[\text{M}]^+$  292.1675, found 292.1700

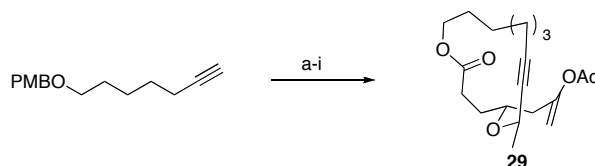

**Reagents and conditions**

a)  $^t\text{BuLi}$ , THF,  $-78$   $^\circ\text{C}$ , then  $(\text{CH}_2\text{O})_n$ , rt. b)  $\text{SO}_3\cdot\text{Py}$ , DMSO,  $\text{Et}_3\text{N}$ ,  $\text{CH}_2\text{Cl}_2$ , 33% (two steps). c)  $^{11}\text{5-Hexyne-1,3-diol bis-trimethylsilyl ether}$ , TMSOTf,  $\text{CH}_2\text{Cl}_2$ ,  $-78$   $^\circ\text{C}$ , 30%. d)  $^{12}\text{Me}_3\text{Al}$ , PhMe,  $0$   $^\circ\text{C}$ , 68%. e) Dess-Martin periodinane,  $\text{NaHCO}_3$ ,  $\text{CH}_2\text{Cl}_2$ , 83%. f)  $\text{NaClO}_2$ ,  $\text{NaH}_2\text{PO}_4$ , 2-methyl-2-butene,  $^t\text{BuOH}$ ,  $\text{H}_2\text{O}$ ,  $-10$   $^\circ\text{C}$ . g) DDQ,  $\text{CH}_2\text{Cl}_2$ ,  $\text{H}_2\text{O}$ . h) 2-Chloro-1-methylpyridinium iodide,  $\text{Et}_3\text{N}$ ,  $\text{CH}_3\text{CN}$ , reflux. i) HOAc, 1-decyne,  $\text{Na}_2\text{CO}_3$ ,  $[\text{Ru}(\textit{p}\text{-cymene})\text{Cl}_2]_2$ ,  $\text{Fur}_3\text{P}$ , PhMe,  $80$   $^\circ\text{C}$ , 29% (four steps).

**Scheme 8.** Synthesis of **29**. Note: Compound **31** was synthesized through a very similar sequence.

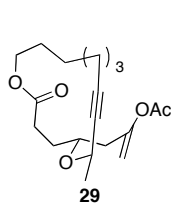

**Macrolactone substrate 29.**

$^1\text{H}$  NMR (400 MHz,  $\text{CDCl}_3$ )  $\delta$  4.89 (d, 1H,  $J = 1.2$  Hz), 4.85 (d, 1H,  $J = 1.2$  Hz), 4.64-4.58 (m, 1H), 4.44 (ddt, 1H,  $J = 2.0, 6.4, 12.8$  Hz), 4.25 (ddd, 1H,  $J = 2.8, 8.0, 11.2$  Hz), 4.12-4.07 (m, 1H), 2.71 (dd, 1H,  $J = 4.8, 14.0$  Hz), 2.50 (d, 2H,  $J = 6.4$  Hz), 2.41 (dd, 1H,  $J = 6.8, 14.0$  Hz), 2.30 (td, 2H,  $J = 1.6, 6.0$  Hz), 2.15 (s, 3H), 1.80-1.45 (m, 8H), 1.36 (d, 3H,  $J = 6.8$  Hz);  $^{13}\text{C}$  NMR (100 MHz,  $\text{CDCl}_3$ )  $\delta$  171.8, 169.2, 152.8, 104.2, 87.2, 80.1, 69.8, 65.6, 62.5, 40.0, 39.8, 27.4, 26.8, 26.7, 26.0, 22.6, 21.4, 18.3; IR (neat) 2933, 2859, 1756, 1733, 1668, 1434, 1370, 1332, 1194, 1091, 1050, 1021,  $877$   $\text{cm}^{-1}$ ; HRMS (ESI)  $m/z$  calcd for  $\text{C}_{18}\text{H}_{27}\text{O}_5$   $[\text{M}]^+$  323.1858, found 323.1856.

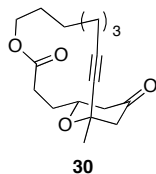

**Cyclization of 29 to form 30.**

To a suspension of macrolactone substrate **29** (36 mg, 0.11 mmol), 2,6-dichloropyridine (66 mg, 0.45 mmol),  $\text{LiClO}_4$  (3.6 mg, 0.034 mmol), and 4 Å molecular sieves (72 mg) in anhydrous DCE (1.4 mL) was added DDQ (51 mg, 0.22 mmol) in one portion at rt. The mixture was stirred at rt for 10 h, then was warmed to  $30$   $^\circ\text{C}$ . 25 mg (0.11 mmol) DDQ was added after the reaction was stirred at  $30$   $^\circ\text{C}$  for 43 h. The reaction was quenched with 3 drops of  $\text{NEt}_3$ . The black mixture was loaded directly onto a short plug of silica gel and eluted with dichloromethane and EtOAc. The filtrate was concentrated and purified by flash chromatography (hexane:EtOAc, 10:1 to 8:1) to give the desired *trans*-product **30** (12.4 mg, 40%). **30**:  $^1\text{H}$  NMR (400 MHz,  $\text{CDCl}_3$ )  $\delta$  4.80-4.73 (m, 1H), 4.21-4.07 (m, 2H), 2.57 (d, 1H,  $J = 1.6$  Hz), 2.56 (s, 1H), 2.52 (dd, 1H,  $J = 2.0, 14.0$  Hz), 2.43 (d, 1H,  $J = 13.6$  Hz), 2.39 (dt, 1H,  $J = 2.0, 14.0$  Hz), 2.27-2.20 (m, 3H), 1.84-1.75 (m, 1H), 1.68-1.62 (m, 3H), 1.59 (s, 3H), 1.56-1.39 (m, 4H);  $^{13}\text{C}$  NMR (100 MHz,  $\text{CDCl}_3$ )  $\delta$  205.2, 170.3, 87.3, 80.7, 72.6, 70.2, 64.5, 53.6, 47.1, 42.7, 30.6, 27.6, 26.7, 26.3, 24.8, 17.5; IR (neat) 2920, 2858, 1731, 1468, 1449, 1426, 1375, 1316, 1275, 1259, 1204, 1162, 1129, 1100, 1071, 1029,  $968$   $\text{cm}^{-1}$ ; HRMS (EI)  $m/z$  calcd for  $\text{C}_{16}\text{H}_{22}\text{O}_4$   $[\text{M}]^+$  278.1518, found 278.1505.

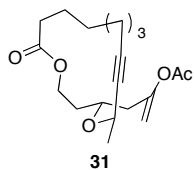

### Macrolactone substrate **31**.

$^1\text{H}$  NMR (400 MHz,  $\text{CDCl}_3$ )  $\delta$  4.88 (s, 1H), 4.83 (d, 1H,  $J = 1.2$  Hz), 4.50 (ddt, 1H,  $J = 2.0, 6.4, 12.8$  Hz), 4.35-4.26 (m, 2H), 4.16 (td, 1H,  $J = 2.4, 11.6$  Hz), 2.67 (dd, 1H,  $J = 3.2, 15.2$  Hz), 2.43-2.37 (m, 3H), 2.30-2.18 (m, 3H), 2.14 (s, 3H), 1.71-1.57 (m, 4H), 1.54-1.46 (m, 4H), 1.37 (d, 3H,  $J = 6.4$  Hz);  $^{13}\text{C}$  NMR (100 MHz,  $\text{CDCl}_3$ )  $\delta$  173.7, 169.3, 153.4, 103.8, 86.9, 80.3, 69.1, 61.9, 60.8, 38.1, 34.4, 31.4, 27.1, 26.8, 24.3, 22.8, 21.4, 18.2; IR (neat) 2933, 2862, 1754, 1731, 1667, 1436, 1369, 1332, 1202, 1085, 1021, 966, 874  $\text{cm}^{-1}$ ; HRMS (ESI)  $m/z$  calcd for  $\text{C}_{18}\text{H}_{26}\text{O}_5\text{Na}$  [ $\text{M}+\text{Na}$ ] $^+$  345.1678, found 345.1668.

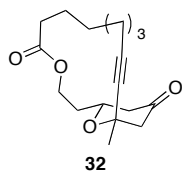

### Cyclization of **31** to form **32**.

To a suspension of macrolactone substrate **31** (40 mg, 0.12 mmol), 2,6-dichloropyridine (73 mg, 0.50 mmol),  $\text{LiClO}_4$  (4.0 mg, 0.037 mmol), and 4 Å molecular sieves (80 mg) in anhydrous DCE (1.5 mL) was added DDQ (56 mg, 0.25 mmol) in one portion at rt. The mixture was stirred at rt for 8 h, and then warmed to 30 °C. 27 mg (0.12 mmol) DDQ was added after the reaction was stirred at 30 °C for 26 h. The resulting mixture was stirred for 14 h at 30 °C, and then quenched with  $\text{NEt}_3$ . The black mixture was loaded directly onto a short plug of silica gel and eluted with dichloromethane and EtOAc. The filtrate was concentrated and purified by flash chromatography to give the desired *trans*-product **32** (13.4 mg, 39%). **32**:  $^1\text{H}$  NMR (400 MHz,  $\text{CDCl}_3$ )  $\delta$  4.50-4.37 (m, 2H), 4.05 (dt, 1H,  $J = 4.0, 11.2$  Hz), 2.53 (dd, 1H,  $J = 2.0, 14.0$  Hz), 2.48-2.36 (m, 3H), 2.36-2.25 (m, 2H), 2.24-2.20 (m, 1H), 2.18-2.12 (m, 1H), 1.93-1.88 (m, 2H), 1.72-1.61 (m, 2H), 1.58 (s, 1H), 1.56-1.41 (m, 4H);  $^{13}\text{C}$  NMR (100 MHz,  $\text{CDCl}_3$ )  $\delta$  205.8, 173.9, 87.5, 80.7, 72.4, 68.3, 60.3, 54.0, 47.5, 34.9, 34.7, 30.2, 27.2, 26.8, 24.8, 18.1; IR (neat) 2928, 2859, 1728, 1441, 1357, 1303, 1254, 1166, 1142, 1085, 1033, 1001, 865, 784  $\text{cm}^{-1}$ ; HRMS (EI)  $m/z$  calcd for  $\text{C}_{16}\text{H}_{23}\text{O}_4$  [ $\text{M}$ ] $^+$  279.1596, found 279.1582.

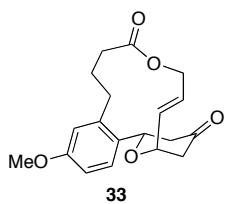

### Reduction of macrolactone **13** to form **33**.<sup>13</sup>

To a solution of macrolactone **13** (14 mg, 0.044 mmol) in dry DCM (0.1 mL) was added  $\text{HSi}(\text{OEt})_3$  (9.7  $\mu\text{L}$ , 0.053 mmol) under argon atmosphere. The resulting solution was cooled to 0 °C and added  $[\text{Cp}^*\text{Ru}(\text{NCCCH}_3)_3]\text{PF}_6$  (cat.). Then the reaction was warmed to rt and stirred at rt for 30 min then was diluted with 2 mL dry  $\text{Et}_2\text{O}$ . The resulting mixture was filtered through a plug of florisil (2 cm), washed with 2 mL dry  $\text{Et}_2\text{O}$  and concentrated *in vacuo*. The residue was redissolved in 0.3 mL dry THF. Under argon atmosphere,  $\text{CuI}$  (1 mg, cat.) was added followed by  $\text{Bu}_4\text{NF}$  (84  $\mu\text{L}$ , 0.084 mmol) at rt. The resulting mixture was stirred at rt for 4 h, then was diluted with EtOAc, filtered through a pad of silica gel and concentrated in vacuum. The residue was purified by flash chromatography (hexane:EtOAc, 6:1 to 4:1) to give the desired alkene (7.2 mg, 49%) as yellowish oil. **33**:  $^1\text{H}$  NMR (400 MHz,  $\text{C}_6\text{D}_6$ )  $\delta$  7.25 (d, 1H,  $J = 8.4$  Hz), 6.68 (dd, 1H,  $J = 2.8, 8.4$  Hz), 6.59 (d, 1H,  $J = 2.8$  Hz), 5.92 (ddd, 1H,  $J = 0.8, 4.4, 16.0$  Hz), 5.81 (dddd, 1H,  $J = 0.8, 4.4, 5.6, 16.4$  Hz), 4.90 (dd, 1H,  $J = 2.4, 12.0$  Hz), 4.44-4.43 (m, 1H), 4.36 (dd, 1H,  $J = 6.4, 12.4$  Hz), 4.07 (ddt, 1H,  $J = 1.2, 4.4, 12.0$  Hz), 2.61-2.48 (m, 2H), 2.43-2.29 (m, 4H), 2.04 (ddd, 1H,  $J = 3.2, 9.6, 12.4$  Hz), 1.94 (ddd, 1H,  $J = 3.2, 9.6, 12.4$  Hz), 1.62-1.58 (m, 1H), 1.50-1.43 (m, 1H);  $^{13}\text{C}$  NMR (100 MHz,  $\text{C}_6\text{D}_6$ )  $\delta$  205.0, 172.8, 160.4, 142.4, 135.7, 131.9, 130.6, 116.0, 112.3, 72.6, 67.6, 61.5, 55.1, 48.6, 43.5, 34.8, 32.1, 30.6, 29.2; IR (neat) 2923, 2852, 1730, 1611, 1579,

1504, 1459, 1375, 1264, 1235, 1156, 1133, 1101, 1042, 995, 954, 810  $\text{cm}^{-1}$ ; HRMS (EI)  $m/z$  calcd for  $\text{C}_{19}\text{H}_{22}\text{O}_5\text{Na}$   $[\text{M}+\text{Na}]^+$  353.1365, found 353.1374.

## References

1. Lee, A. S.-Y.; Chu, S.-F.; Chang, Y.-T.; Wang, S.-H. *Tetrahedron Lett.* **2004**, *45*, 1551.
2. Rai, A. N.; Basu, A. *Tetrahedron Lett.* **2003**, *44*, 2267.
3. Goossen, L. J.; Paetzold, J.; Koley, D. *Chem. Commun.* **2003**, 706.
4. Dunn, P. J.; Rees, C. W. *J. Soc. Chem. Perkin Trans. 1*, **1987**, 1579.
5. Miyaura, N.; Ishiyama, T.; Sasaki, H.; Ishikawa, M.; Satoh, M.; Suzuki, A. *J. Am. Chem. Soc.* **1989**, *111*, 314.
6. Fillion, E.; Beingessner, R. L. *J. Org. Chem.* **2003**, *68*, 9485.
7. a) Mukaiyama, T.; Usui, M.; Saigo, K. *Chem. Lett.* **1976**, 49; b) Sawamura, K.; Yoshida, K.; Suzuki, A.; Motozaki, T.; Kozawa, I.; Hayamizu, T.; Munakata, R.; Takao, K.; Tadano, K. *J. Org. Chem.* **2007**, *72*, 6143.
8. Zhdanko, A. G.; Nenajdenko, V. G. *J. Org. Chem.* **2009**, *74*, 884-887.
9. Commandeur, C.; Thorimbert, S.; Malacria, M. *J. Org. Chem.* **2003**, *68*, 5588.
10. Hatanaka, Y.; Hiyama, T. *J. Org. Chem.* **1988**, *53*, 918-920.
11. Noyori, R.; Murata, S.; Suzuki, M. *Tetrahedron*, **1981**, *37*, 3899-3910.
12. Ishihara, K.; Hanaki, N.; Yamamoto, H. *J. Am. Chem. Soc.* **1993**, *115*, 10695-10704.
13. Trost, B. M.; Ball, Z. T.; Jöge, T. *J. Am. Chem. Soc.* **2002**, *124*, 7922-7923.

## Crystal data (macrolactone 24)

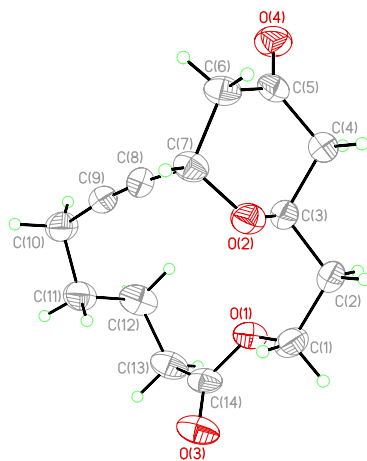

Table 1. Crystal data and structure refinement for xhflor1.

|                                 |                                                |          |
|---------------------------------|------------------------------------------------|----------|
| Empirical formula               | C <sub>14</sub> H <sub>18</sub> O <sub>4</sub> |          |
| Formula weight                  | 250.28                                         |          |
| Temperature                     | 203(2) K                                       |          |
| Wavelength                      | 0.71073 Å                                      |          |
| Crystal system                  | Orthorhombic                                   |          |
| Space group                     | P c a 21                                       |          |
| Unit cell dimensions            | a = 15.563(7) Å                                | a = 90°. |
|                                 | b = 5.224(3) Å                                 | b = 90°. |
|                                 | c = 32.605(15) Å                               | g = 90°. |
| Volume                          | 2651(2) Å <sup>3</sup>                         |          |
| Z                               | 8                                              |          |
| Density (calculated)            | 1.254 Mg/m <sup>3</sup>                        |          |
| Absorption coefficient          | 0.091 mm <sup>-1</sup>                         |          |
| F(000)                          | 1072                                           |          |
| Crystal size                    | 0.36 x 0.20 x 0.05 mm <sup>3</sup>             |          |
| Theta range for data collection | 2.50 to 25.00°.                                |          |
| Index ranges                    | -18 ≤ h ≤ 18, -6 ≤ k ≤ 6, -38 ≤ l ≤ 38         |          |
| Reflections collected           | 19056                                          |          |
| Independent reflections         | 2379 [R(int) = 0.0781]                         |          |
| Completeness to theta = 25.00°  | 100.0 %                                        |          |
| Absorption correction           | Semi-empirical from equivalents                |          |
| Max. and min. transmission      | 0.9955 and 0.9679                              |          |
| Refinement method               | Full-matrix least-squares on F <sup>2</sup>    |          |

|                                      |                                    |
|--------------------------------------|------------------------------------|
| Data / restraints / parameters       | 2379 / 1 / 325                     |
| Goodness-of-fit on $F^2$             | 0.877                              |
| Final R indices [ $I > 2\sigma(I)$ ] | R1 = 0.0426, wR2 = 0.1184          |
| R indices (all data)                 | R1 = 0.0589, wR2 = 0.1303          |
| Absolute structure parameter         | ?                                  |
| Largest diff. peak and hole          | 0.147 and -0.155 e.Å <sup>-3</sup> |

Table 2. Atomic coordinates ( $\times 10^4$ ) and equivalent isotropic displacement parameters ( $\text{Å}^2 \times 10^3$ ) for xhflor1.  $U(\text{eq})$  is defined as one third of the trace of the orthogonalized  $U_{ij}$  tensor.

|        | x       | y         | z       | U(eq) |
|--------|---------|-----------|---------|-------|
| O(1)   | 1266(2) | 353(6)    | 1782(1) | 63(1) |
| C(1)   | 1118(3) | 2511(10)  | 2047(2) | 69(1) |
| O(2)   | 2874(2) | 4255(5)   | 2224(1) | 57(1) |
| C(2)   | 1616(3) | 2058(11)  | 2439(1) | 75(1) |
| C(3)   | 2577(2) | 1819(8)   | 2367(1) | 53(1) |
| O(3)   | 615(2)  | 2394(5)   | 1271(1) | 75(1) |
| O(4)   | 4503(2) | -657(6)   | 2767(1) | 71(1) |
| C(4)   | 3071(3) | 1048(9)   | 2751(1) | 60(1) |
| C(5)   | 4026(3) | 1057(8)   | 2658(1) | 52(1) |
| C(6)   | 4349(3) | 3340(8)   | 2429(1) | 57(1) |
| C(7)   | 3746(2) | 4155(8)   | 2078(1) | 53(1) |
| C(8)   | 3807(2) | 2455(8)   | 1720(1) | 52(1) |
| C(9)   | 3791(2) | 1136(9)   | 1422(1) | 59(1) |
| C(10)  | 3681(3) | -346(12)  | 1045(2) | 76(2) |
| C(11)  | 2737(3) | -375(10)  | 920(1)  | 69(1) |
| C(12)  | 2212(3) | -2279(8)  | 1164(2) | 70(1) |
| C(13)  | 1234(3) | -1708(9)  | 1151(2) | 69(1) |
| C(14)  | 1005(2) | 565(8)    | 1393(2) | 55(1) |
| O(1')  | 3660(2) | -4764(6)  | 4433(1) | 64(1) |
| C(1')  | 3531(3) | -2670(9)  | 4154(2) | 69(1) |
| O(2')  | 5288(2) | -1023(5)  | 3962(1) | 59(1) |
| C(2')  | 4028(3) | -3290(12) | 3772(2) | 77(1) |
| C(3')  | 4986(2) | -3518(8)  | 3847(1) | 53(1) |
| O(3')  | 3040(2) | -2561(6)  | 4940(1) | 79(1) |
| O(4')  | 6931(2) | -5947(6)  | 3422(1) | 70(1) |
| C(4')  | 5494(3) | -4461(9)  | 3478(1) | 61(1) |
| C(5')  | 6440(3) | -4303(8)  | 3544(1) | 52(1) |
| C(6')  | 6758(3) | -1962(8)  | 3762(1) | 59(1) |
| C(7')  | 6156(2) | -1086(7)  | 4103(1) | 54(1) |
| C(8')  | 6233(2) | -2642(8)  | 4481(1) | 55(1) |
| C(9')  | 6224(2) | -3906(10) | 4784(1) | 62(1) |
| C(10') | 6116(3) | -5298(12) | 5166(2) | 80(2) |



|        |         |           |         |       |
|--------|---------|-----------|---------|-------|
| C(11') | 5154(3) | -5288(10) | 5297(1) | 67(1) |
| C(12') | 4622(3) | -7256(8)  | 5065(2) | 73(1) |
| C(13') | 3668(3) | -6683(9)  | 5082(2) | 72(1) |
| C(14') | 3408(3) | -4421(8)  | 4821(1) | 56(1) |

---

Table 3. Bond lengths [ $\text{\AA}$ ] and angles [ $^\circ$ ] for xhflor1.

|              |          |
|--------------|----------|
| O(1)-C(14)   | 1.337(6) |
| O(1)-C(1)    | 1.439(6) |
| C(1)-C(2)    | 1.512(7) |
| C(1)-H(1A)   | 0.9800   |
| C(1)-H(1B)   | 0.9800   |
| O(2)-C(3)    | 1.433(5) |
| O(2)-C(7)    | 1.438(5) |
| C(2)-C(3)    | 1.519(6) |
| C(2)-H(2A)   | 0.9800   |
| C(2)-H(2B)   | 0.9800   |
| C(3)-C(4)    | 1.524(6) |
| C(3)-H(3A)   | 0.9900   |
| O(3)-C(14)   | 1.200(5) |
| O(4)-C(5)    | 1.216(5) |
| C(4)-C(5)    | 1.516(6) |
| C(4)-H(4A)   | 0.9800   |
| C(4)-H(4B)   | 0.9800   |
| C(5)-C(6)    | 1.495(6) |
| C(6)-C(7)    | 1.539(5) |
| C(6)-H(6A)   | 0.9800   |
| C(6)-H(6B)   | 0.9800   |
| C(7)-C(8)    | 1.470(6) |
| C(7)-H(7A)   | 0.9900   |
| C(8)-C(9)    | 1.192(6) |
| C(9)-C(10)   | 1.465(8) |
| C(10)-C(11)  | 1.525(6) |
| C(10)-H(10A) | 0.9800   |
| C(10)-H(10B) | 0.9800   |
| C(11)-C(12)  | 1.514(7) |
| C(11)-H(11A) | 0.9800   |
| C(11)-H(11B) | 0.9800   |
| C(12)-C(13)  | 1.551(6) |
| C(12)-H(12A) | 0.9800   |
| C(12)-H(12B) | 0.9800   |
| C(13)-C(14)  | 1.469(7) |
| C(13)-H(13A) | 0.9800   |
| C(13)-H(13B) | 0.9800   |
| O(1')-C(14') | 1.335(6) |

|                  |          |
|------------------|----------|
| O(1')-C(1')      | 1.437(6) |
| C(1')-C(2')      | 1.502(7) |
| C(1')-H(1'A)     | 0.9800   |
| C(1')-H(1'B)     | 0.9800   |
| O(2')-C(7')      | 1.428(5) |
| O(2')-C(3')      | 1.436(5) |
| C(2')-C(3')      | 1.515(6) |
| C(2')-H(2'A)     | 0.9800   |
| C(2')-H(2'B)     | 0.9800   |
| C(3')-C(4')      | 1.521(6) |
| C(3')-H(3'A)     | 0.9900   |
| O(3')-C(14')     | 1.193(5) |
| O(4')-C(5')      | 1.217(5) |
| C(4')-C(5')      | 1.490(6) |
| C(4')-H(4'A)     | 0.9800   |
| C(4')-H(4'B)     | 0.9800   |
| C(5')-C(6')      | 1.499(6) |
| C(6')-C(7')      | 1.525(6) |
| C(6')-H(6'A)     | 0.9800   |
| C(6')-H(6'B)     | 0.9800   |
| C(7')-C(8')      | 1.481(6) |
| C(7')-H(7'A)     | 0.9900   |
| C(8')-C(9')      | 1.187(6) |
| C(9')-C(10')     | 1.455(8) |
| C(10')-C(11')    | 1.557(6) |
| C(10')-H(10C)    | 0.9800   |
| C(10')-H(10D)    | 0.9800   |
| C(11')-C(12')    | 1.522(7) |
| C(11')-H(11C)    | 0.9800   |
| C(11')-H(11D)    | 0.9800   |
| C(12')-C(13')    | 1.516(6) |
| C(12')-H(12C)    | 0.9800   |
| C(12')-H(12D)    | 0.9800   |
| C(13')-C(14')    | 1.513(7) |
| C(13')-H(13C)    | 0.9800   |
| C(13')-H(13D)    | 0.9800   |
| C(14)-O(1)-C(1)  | 117.2(4) |
| O(1)-C(1)-C(2)   | 107.6(4) |
| O(1)-C(1)-H(1A)  | 110.2    |
| C(2)-C(1)-H(1A)  | 110.2    |
| O(1)-C(1)-H(1B)  | 110.2    |
| C(2)-C(1)-H(1B)  | 110.2    |
| H(1A)-C(1)-H(1B) | 108.5    |
| C(3)-O(2)-C(7)   | 112.4(3) |
| C(3)-C(2)-C(1)   | 112.8(4) |
| C(3)-C(2)-H(2A)  | 109.0    |

|                     |          |
|---------------------|----------|
| C(1)-C(2)-H(2A)     | 109.0    |
| C(3)-C(2)-H(2B)     | 109.0    |
| C(1)-C(2)-H(2B)     | 109.0    |
| H(2A)-C(2)-H(2B)    | 107.8    |
| O(2)-C(3)-C(2)      | 107.2(3) |
| O(2)-C(3)-C(4)      | 109.9(3) |
| C(2)-C(3)-C(4)      | 113.1(3) |
| O(2)-C(3)-H(3A)     | 108.8    |
| C(2)-C(3)-H(3A)     | 108.8    |
| C(4)-C(3)-H(3A)     | 108.8    |
| C(5)-C(4)-C(3)      | 109.3(3) |
| C(5)-C(4)-H(4A)     | 109.8    |
| C(3)-C(4)-H(4A)     | 109.8    |
| C(5)-C(4)-H(4B)     | 109.8    |
| C(3)-C(4)-H(4B)     | 109.8    |
| H(4A)-C(4)-H(4B)    | 108.3    |
| O(4)-C(5)-C(6)      | 121.9(4) |
| O(4)-C(5)-C(4)      | 122.5(4) |
| C(6)-C(5)-C(4)      | 115.6(3) |
| C(5)-C(6)-C(7)      | 112.8(3) |
| C(5)-C(6)-H(6A)     | 109.0    |
| C(7)-C(6)-H(6A)     | 109.0    |
| C(5)-C(6)-H(6B)     | 109.0    |
| C(7)-C(6)-H(6B)     | 109.0    |
| H(6A)-C(6)-H(6B)    | 107.8    |
| O(2)-C(7)-C(8)      | 110.1(3) |
| O(2)-C(7)-C(6)      | 109.9(3) |
| C(8)-C(7)-C(6)      | 112.6(3) |
| O(2)-C(7)-H(7A)     | 108.0    |
| C(8)-C(7)-H(7A)     | 108.0    |
| C(6)-C(7)-H(7A)     | 108.0    |
| C(9)-C(8)-C(7)      | 174.8(4) |
| C(8)-C(9)-C(10)     | 173.6(4) |
| C(9)-C(10)-C(11)    | 110.0(4) |
| C(9)-C(10)-H(10A)   | 109.7    |
| C(11)-C(10)-H(10A)  | 109.7    |
| C(9)-C(10)-H(10B)   | 109.7    |
| C(11)-C(10)-H(10B)  | 109.7    |
| H(10A)-C(10)-H(10B) | 108.2    |
| C(12)-C(11)-C(10)   | 112.7(4) |
| C(12)-C(11)-H(11A)  | 109.1    |
| C(10)-C(11)-H(11A)  | 109.1    |
| C(12)-C(11)-H(11B)  | 109.1    |
| C(10)-C(11)-H(11B)  | 109.1    |
| H(11A)-C(11)-H(11B) | 107.8    |
| C(11)-C(12)-C(13)   | 112.9(4) |

|                     |          |
|---------------------|----------|
| C(11)-C(12)-H(12A)  | 109.0    |
| C(13)-C(12)-H(12A)  | 109.0    |
| C(11)-C(12)-H(12B)  | 109.0    |
| C(13)-C(12)-H(12B)  | 109.0    |
| H(12A)-C(12)-H(12B) | 107.8    |
| C(14)-C(13)-C(12)   | 112.3(3) |
| C(14)-C(13)-H(13A)  | 109.2    |
| C(12)-C(13)-H(13A)  | 109.2    |
| C(14)-C(13)-H(13B)  | 109.2    |
| C(12)-C(13)-H(13B)  | 109.2    |
| H(13A)-C(13)-H(13B) | 107.9    |
| O(3)-C(14)-O(1)     | 122.2(4) |
| O(3)-C(14)-C(13)    | 126.1(4) |
| O(1)-C(14)-C(13)    | 111.7(4) |
| C(14')-O(1')-C(1')  | 117.1(4) |
| O(1')-C(1')-C(2')   | 106.8(4) |
| O(1')-C(1')-H(1'A)  | 110.4    |
| C(2')-C(1')-H(1'A)  | 110.4    |
| O(1')-C(1')-H(1'B)  | 110.4    |
| C(2')-C(1')-H(1'B)  | 110.4    |
| H(1'A)-C(1')-H(1'B) | 108.6    |
| C(7')-O(2')-C(3')   | 111.9(3) |
| C(1')-C(2')-C(3')   | 112.9(4) |
| C(1')-C(2')-H(2'A)  | 109.0    |
| C(3')-C(2')-H(2'A)  | 109.0    |
| C(1')-C(2')-H(2'B)  | 109.0    |
| C(3')-C(2')-H(2'B)  | 109.0    |
| H(2'A)-C(2')-H(2'B) | 107.8    |
| O(2')-C(3')-C(2')   | 107.0(3) |
| O(2')-C(3')-C(4')   | 109.3(3) |
| C(2')-C(3')-C(4')   | 114.2(4) |
| O(2')-C(3')-H(3'A)  | 108.7    |
| C(2')-C(3')-H(3'A)  | 108.7    |
| C(4')-C(3')-H(3'A)  | 108.7    |
| C(5')-C(4')-C(3')   | 112.4(4) |
| C(5')-C(4')-H(4'A)  | 109.1    |
| C(3')-C(4')-H(4'A)  | 109.1    |
| C(5')-C(4')-H(4'B)  | 109.1    |
| C(3')-C(4')-H(4'B)  | 109.1    |
| H(4'A)-C(4')-H(4'B) | 107.8    |
| O(4')-C(5')-C(4')   | 122.3(4) |
| O(4')-C(5')-C(6')   | 121.6(4) |
| C(4')-C(5')-C(6')   | 116.1(4) |
| C(5')-C(6')-C(7')   | 112.8(3) |
| C(5')-C(6')-H(6'A)  | 109.0    |
| C(7')-C(6')-H(6'A)  | 109.0    |

|                      |          |
|----------------------|----------|
| C(5')-C(6')-H(6'B)   | 109.0    |
| C(7')-C(6')-H(6'B)   | 109.0    |
| H(6'A)-C(6')-H(6'B)  | 107.8    |
| O(2')-C(7')-C(8')    | 110.9(3) |
| O(2')-C(7')-C(6')    | 110.7(4) |
| C(8')-C(7')-C(6')    | 113.1(3) |
| O(2')-C(7')-H(7'A)   | 107.3    |
| C(8')-C(7')-H(7'A)   | 107.3    |
| C(6')-C(7')-H(7'A)   | 107.3    |
| C(9')-C(8')-C(7')    | 174.7(4) |
| C(8')-C(9')-C(10')   | 173.0(5) |
| C(9')-C(10')-C(11')  | 110.2(4) |
| C(9')-C(10')-H(10C)  | 109.6    |
| C(11')-C(10')-H(10C) | 109.6    |
| C(9')-C(10')-H(10D)  | 109.6    |
| C(11')-C(10')-H(10D) | 109.6    |
| H(10C)-C(10')-H(10D) | 108.1    |
| C(12')-C(11')-C(10') | 112.5(4) |
| C(12')-C(11')-H(11C) | 109.1    |
| C(10')-C(11')-H(11C) | 109.1    |
| C(12')-C(11')-H(11D) | 109.1    |
| C(10')-C(11')-H(11D) | 109.1    |
| H(11C)-C(11')-H(11D) | 107.8    |
| C(11')-C(12')-C(13') | 112.3(4) |
| C(11')-C(12')-H(12C) | 109.1    |
| C(13')-C(12')-H(12C) | 109.1    |
| C(11')-C(12')-H(12D) | 109.1    |
| C(13')-C(12')-H(12D) | 109.1    |
| H(12C)-C(12')-H(12D) | 107.9    |
| C(14')-C(13')-C(12') | 113.3(3) |
| C(14')-C(13')-H(13C) | 108.9    |
| C(12')-C(13')-H(13C) | 108.9    |
| C(14')-C(13')-H(13D) | 108.9    |
| C(12')-C(13')-H(13D) | 108.9    |
| H(13C)-C(13')-H(13D) | 107.7    |
| O(3')-C(14')-O(1')   | 124.0(4) |
| O(3')-C(14')-C(13')  | 125.5(4) |
| O(1')-C(14')-C(13')  | 110.5(4) |

---

Symmetry transformations used to generate equivalent atoms:

Table 4. Anisotropic displacement parameters ( $\text{\AA}^2 \times 10^3$ ) for xhflor1. The anisotropic displacement factor exponent takes the form:  $-2p^2 [h^2 a^{*2} U^{11} + \dots + 2 h k a^* b^* U^{12}]$

|        | U11   | U22    | U33   | U23    | U13    | U12    |
|--------|-------|--------|-------|--------|--------|--------|
| O(1)   | 56(2) | 67(2)  | 65(2) | 4(2)   | -13(1) | 7(1)   |
| C(1)   | 47(2) | 91(3)  | 69(3) | -16(2) | -1(2)  | 14(2)  |
| O(2)   | 59(2) | 55(2)  | 56(2) | -10(1) | -7(1)  | 14(1)  |
| C(2)   | 49(2) | 122(4) | 53(2) | -9(3)  | 7(2)   | 11(2)  |
| C(3)   | 47(2) | 65(2)  | 47(2) | -5(2)  | 3(2)   | 4(2)   |
| O(3)   | 78(2) | 56(2)  | 90(2) | 15(2)  | -33(2) | -2(2)  |
| O(4)   | 63(2) | 70(2)  | 80(2) | 18(2)  | -10(2) | 11(2)  |
| C(4)   | 54(2) | 75(3)  | 49(2) | 1(2)   | -1(2)  | 5(2)   |
| C(5)   | 57(2) | 55(2)  | 44(2) | -5(2)  | -12(2) | -1(2)  |
| C(6)   | 56(2) | 53(2)  | 62(2) | -3(2)  | -16(2) | -6(2)  |
| C(7)   | 57(2) | 47(2)  | 55(2) | 1(2)   | -13(2) | -10(2) |
| C(8)   | 45(2) | 61(2)  | 48(2) | 4(2)   | 5(2)   | -1(2)  |
| C(9)   | 43(2) | 84(3)  | 49(2) | 0(2)   | 1(2)   | 7(2)   |
| C(10)  | 59(3) | 115(4) | 53(3) | -23(3) | -1(2)  | 23(2)  |
| C(11)  | 71(3) | 85(3)  | 52(3) | -18(2) | -8(2)  | 24(2)  |
| C(12)  | 93(3) | 44(2)  | 74(3) | -18(2) | -23(3) | 15(2)  |
| C(13)  | 77(3) | 57(2)  | 74(3) | -3(2)  | -32(2) | -9(2)  |
| C(14)  | 40(2) | 50(2)  | 74(3) | 13(2)  | -18(2) | -17(2) |
| O(1')  | 58(2) | 74(2)  | 60(2) | -5(2)  | 15(1)  | 2(1)   |
| C(1')  | 37(2) | 96(3)  | 75(3) | 11(3)  | -1(2)  | 14(2)  |
| O(2')  | 56(2) | 60(2)  | 59(2) | 15(1)  | 8(1)   | 12(1)  |
| C(2')  | 46(2) | 125(4) | 59(3) | 13(3)  | -6(2)  | 5(2)   |
| C(3')  | 46(2) | 72(2)  | 43(2) | 12(2)  | 1(2)   | 2(2)   |
| O(3')  | 80(2) | 59(2)  | 98(2) | -19(2) | 33(2)  | -2(2)  |
| O(4')  | 65(2) | 64(2)  | 81(2) | 2(2)   | 8(2)   | 10(2)  |
| C(4')  | 59(2) | 78(3)  | 46(2) | 7(2)   | -2(2)  | 4(2)   |
| C(5')  | 57(2) | 56(2)  | 43(2) | 18(2)  | 8(2)   | 6(2)   |
| C(6')  | 54(2) | 56(2)  | 67(3) | 11(2)  | 16(2)  | -4(2)  |
| C(7')  | 48(2) | 51(2)  | 63(3) | 4(2)   | 9(2)   | -3(2)  |
| C(8')  | 41(2) | 67(3)  | 56(3) | 1(2)   | 4(2)   | -3(2)  |
| C(9')  | 43(2) | 89(3)  | 55(3) | 7(3)   | -4(2)  | 6(2)   |
| C(10') | 72(3) | 117(4) | 51(3) | 23(3)  | -3(2)  | 25(3)  |
| C(11') | 72(3) | 80(3)  | 50(3) | 18(2)  | 13(2)  | 20(2)  |
| C(12') | 96(4) | 49(2)  | 72(3) | 16(2)  | 27(3)  | 15(2)  |
| C(13') | 82(3) | 54(2)  | 80(3) | 6(2)   | 31(3)  | -16(2) |
| C(14') | 46(2) | 56(2)  | 67(3) | -11(2) | 15(2)  | -16(2) |

Table 5. Hydrogen coordinates ( $\times 10^4$ ) and isotropic displacement parameters ( $\text{\AA}^2 \times 10^3$ ) for xhflor1.

|        | x    | y     | z    | U(eq) |
|--------|------|-------|------|-------|
| H(1A)  | 504  | 2676  | 2107 | 83    |
| H(1B)  | 1314 | 4090  | 1915 | 83    |
| H(2A)  | 1509 | 3480  | 2628 | 90    |
| H(2B)  | 1406 | 487   | 2569 | 90    |
| H(3A)  | 2679 | 523   | 2151 | 64    |
| H(4A)  | 2947 | 2252  | 2974 | 71    |
| H(4B)  | 2893 | -665  | 2839 | 71    |
| H(6A)  | 4917 | 2949  | 2315 | 69    |
| H(6B)  | 4415 | 4772  | 2621 | 69    |
| H(7A)  | 3914 | 5900  | 1991 | 63    |
| H(10A) | 3882 | -2104 | 1088 | 91    |
| H(10B) | 4027 | 414   | 825  | 91    |
| H(11A) | 2495 | 1341  | 958  | 83    |
| H(11B) | 2695 | -799  | 627  | 83    |
| H(12A) | 2406 | -2257 | 1449 | 84    |
| H(12B) | 2314 | -4001 | 1055 | 84    |
| H(13A) | 1057 | -1445 | 866  | 83    |
| H(13B) | 920  | -3192 | 1258 | 83    |
| H(1'A) | 3740 | -1070 | 4275 | 83    |
| H(1'B) | 2919 | -2477 | 4090 | 83    |
| H(2'A) | 3926 | -1947 | 3567 | 92    |
| H(2'B) | 3816 | -4907 | 3658 | 92    |
| H(3'A) | 5082 | -4709 | 4079 | 64    |
| H(4'A) | 5337 | -6242 | 3421 | 73    |
| H(4'B) | 5340 | -3434 | 3238 | 73    |
| H(6'A) | 6825 | -571  | 3563 | 71    |
| H(6'B) | 7325 | -2322 | 3880 | 71    |
| H(7'A) | 6319 | 690   | 4175 | 65    |
| H(10C) | 6465 | -4498 | 5381 | 96    |
| H(10D) | 6313 | -7067 | 5132 | 96    |
| H(11C) | 5115 | -5645 | 5592 | 80    |
| H(11D) | 4913 | -3581 | 5249 | 80    |
| H(12C) | 4728 | -8956 | 5181 | 87    |
| H(12D) | 4808 | -7286 | 4777 | 87    |
| H(13C) | 3350 | -8198 | 4991 | 87    |
| H(13D) | 3506 | -6342 | 5367 | 87    |

# Spectral data

xun-1-29

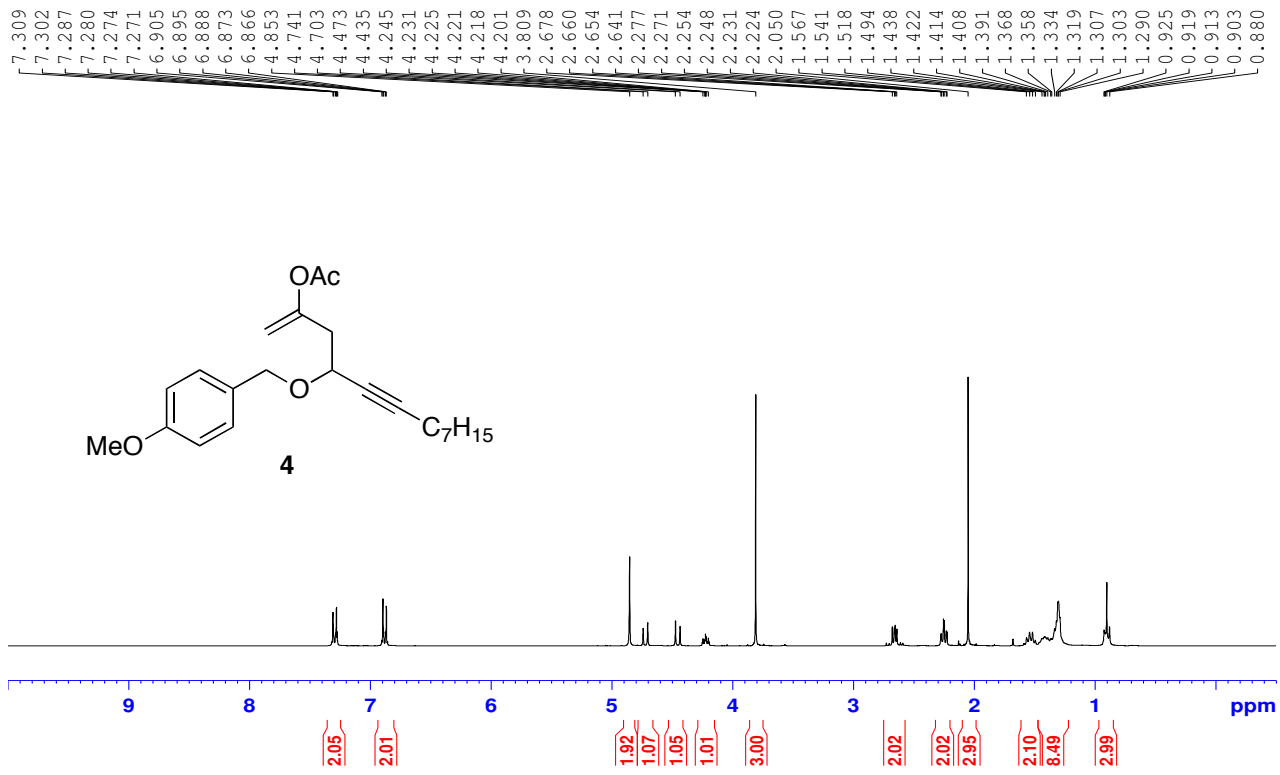

xun-1-29 081810 13C

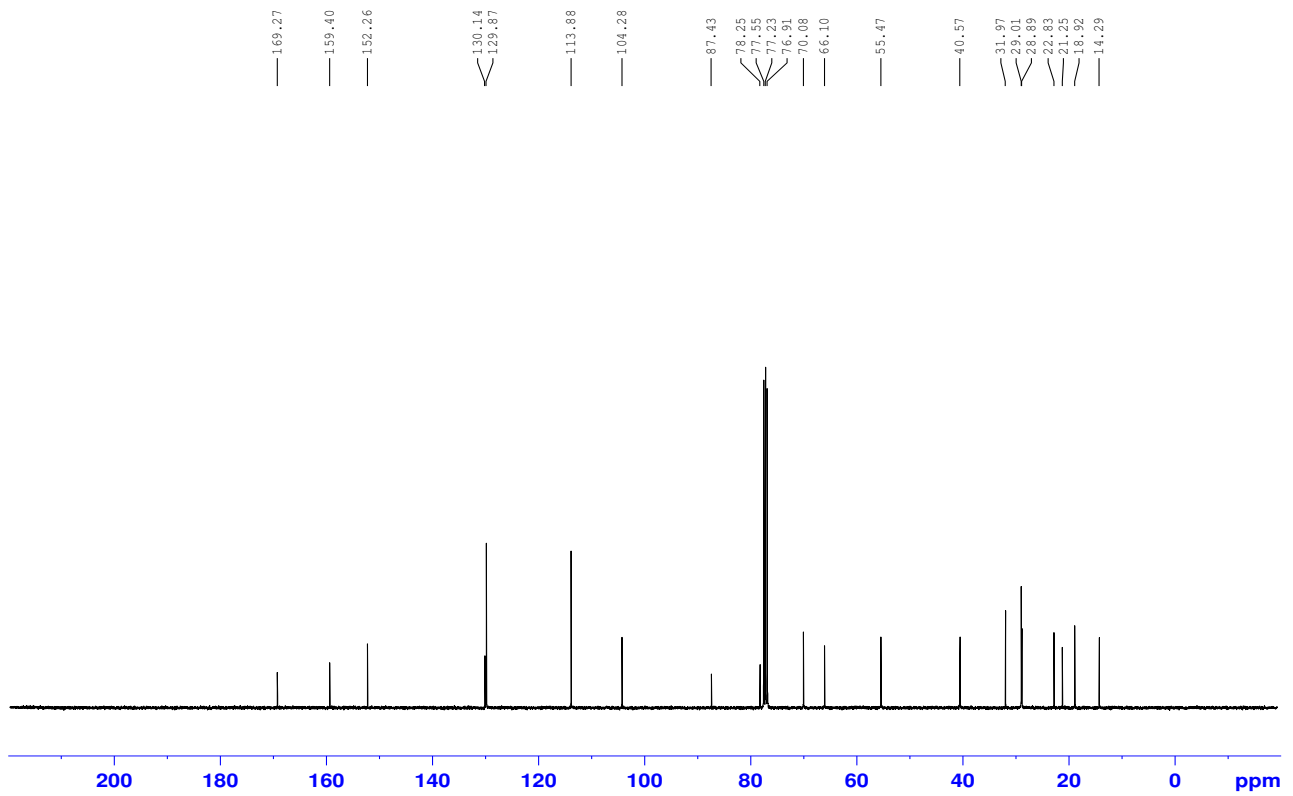



<sup>1</sup>H NMR

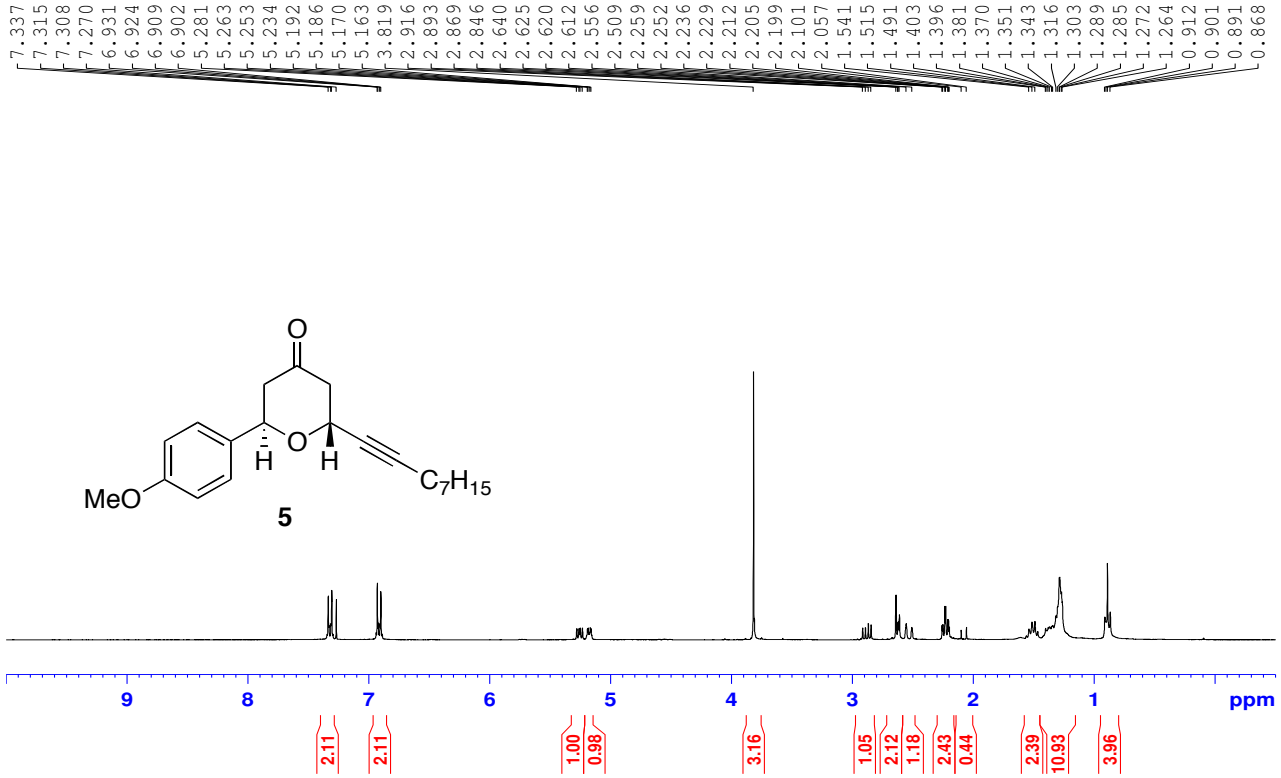

xun-1-30-trans 13C 400a

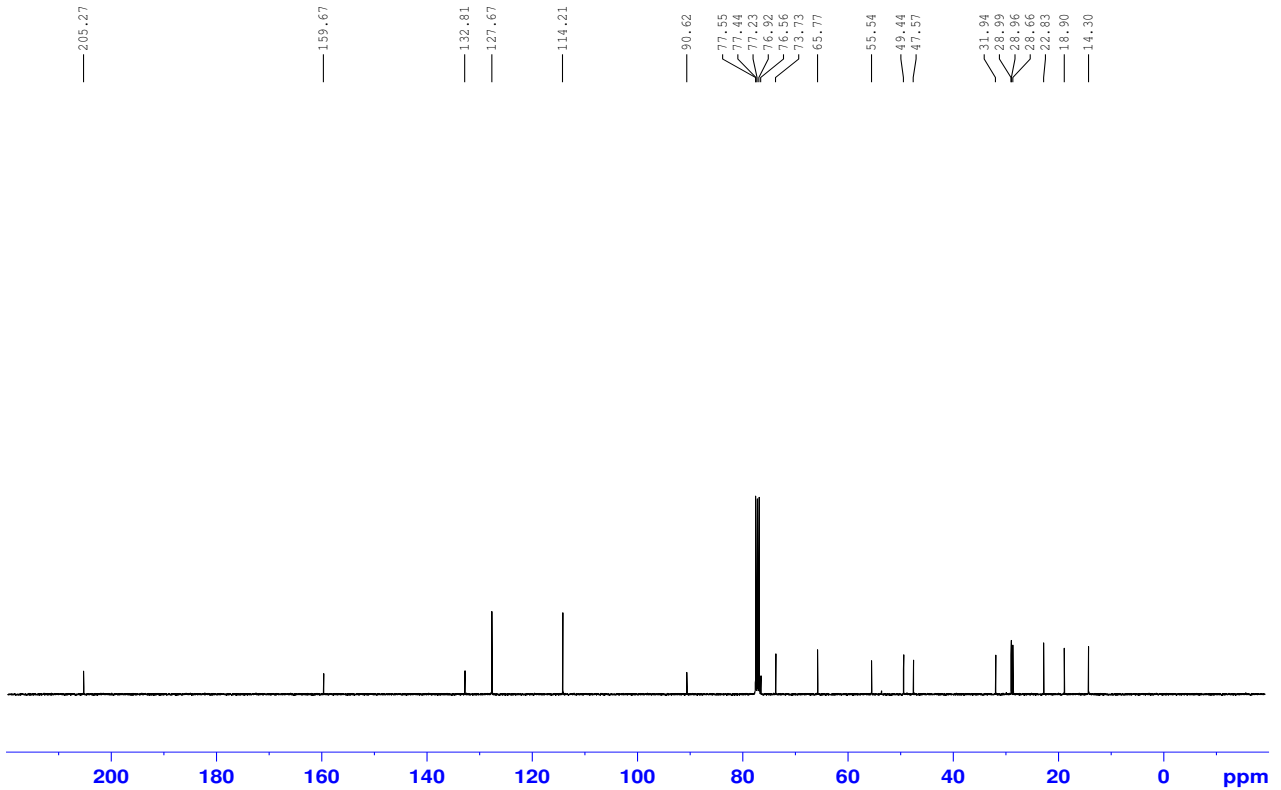

xun-1-30-up

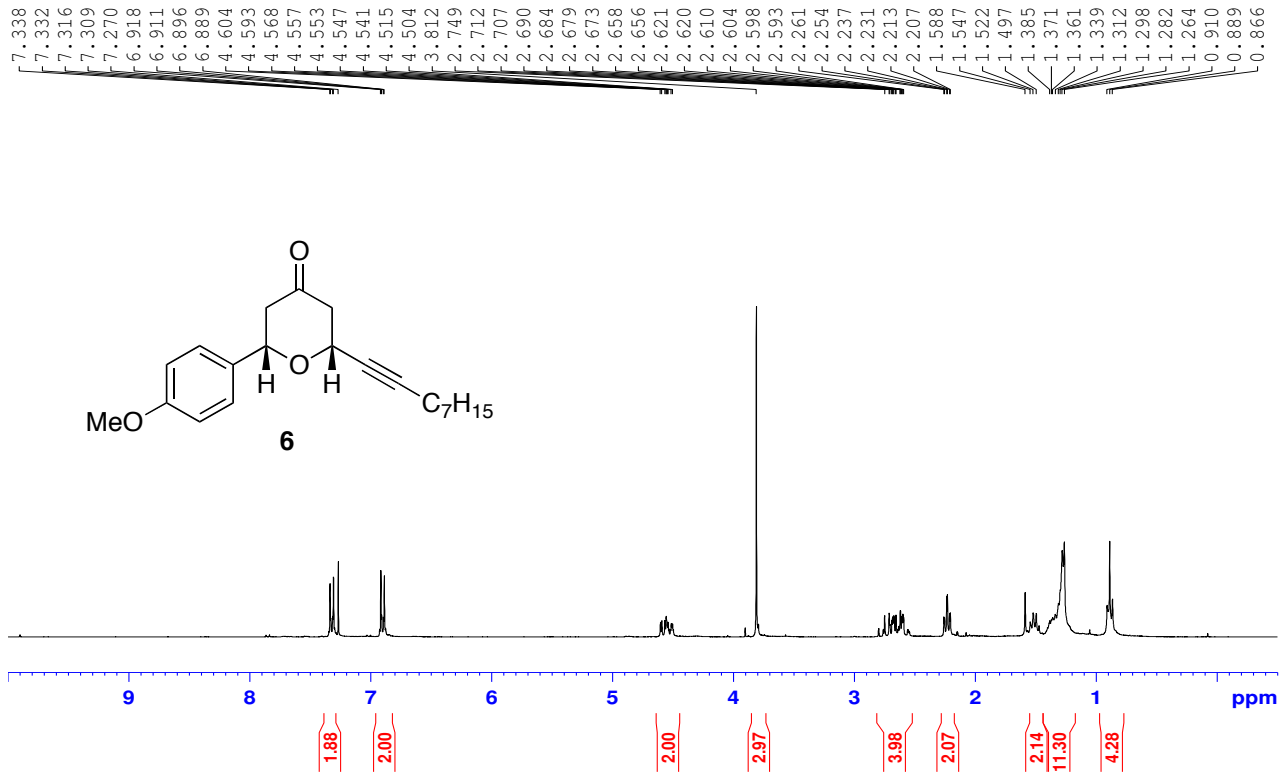

xun-1-30-cis 13C 400a

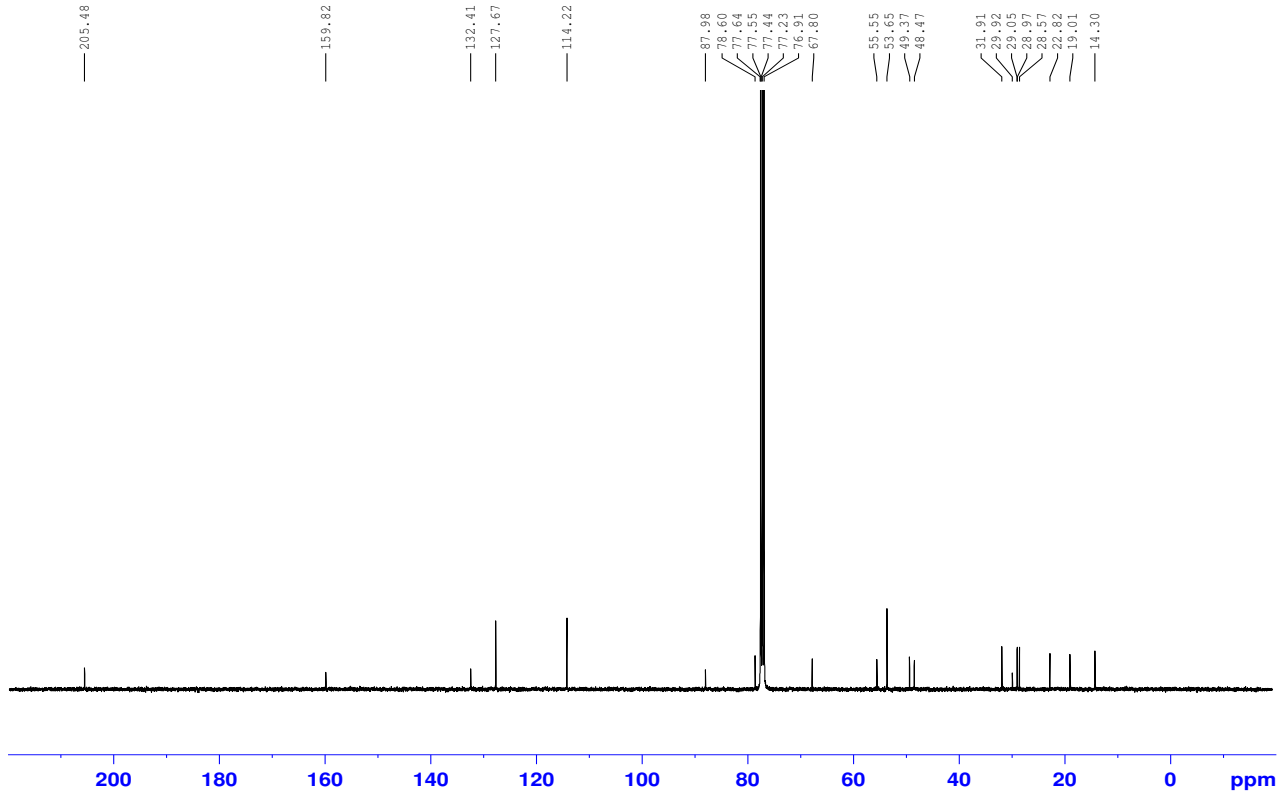

xun-1-262 400A

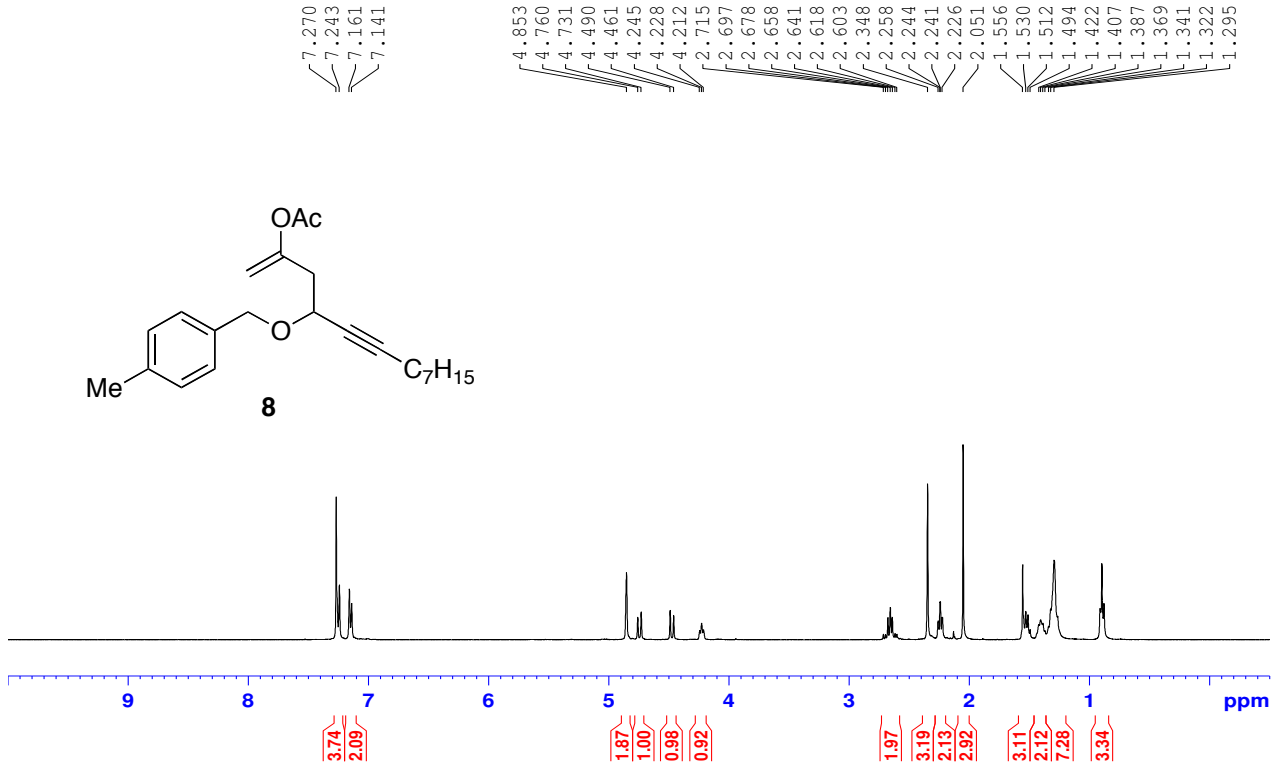

xun-1-262 13C 400B

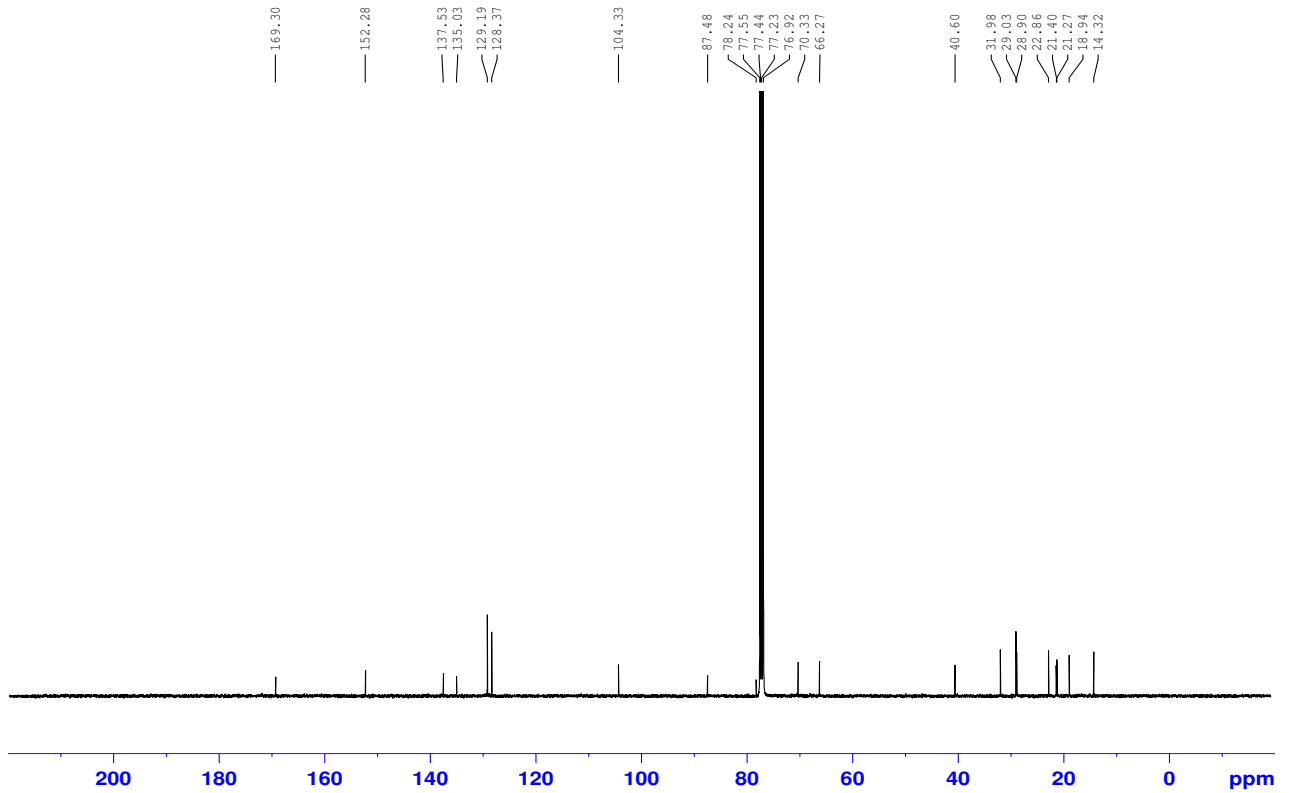

xun-3-78-2 103011 400B

7.298  
7.277  
7.270  
7.208  
7.188  
5.292  
5.282  
5.267  
5.257  
5.207  
5.203  
5.197  
5.190  
5.186  
2.915  
2.898  
2.880  
2.862  
2.648  
2.644  
2.634  
2.609  
2.599  
2.572  
2.567  
2.559  
2.555  
2.550  
2.523  
2.519  
2.515  
2.455  
2.362  
2.250  
2.245  
2.232  
2.227  
2.215  
2.210  
1.563  
1.547  
1.530  
1.511  
1.492  
1.474  
1.391  
1.372  
1.355  
1.331  
1.312  
1.286  
1.279  
1.097  
0.890  
0.873

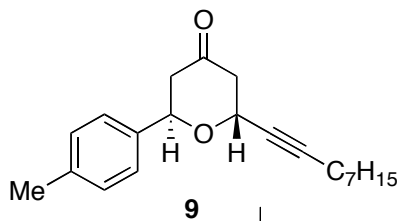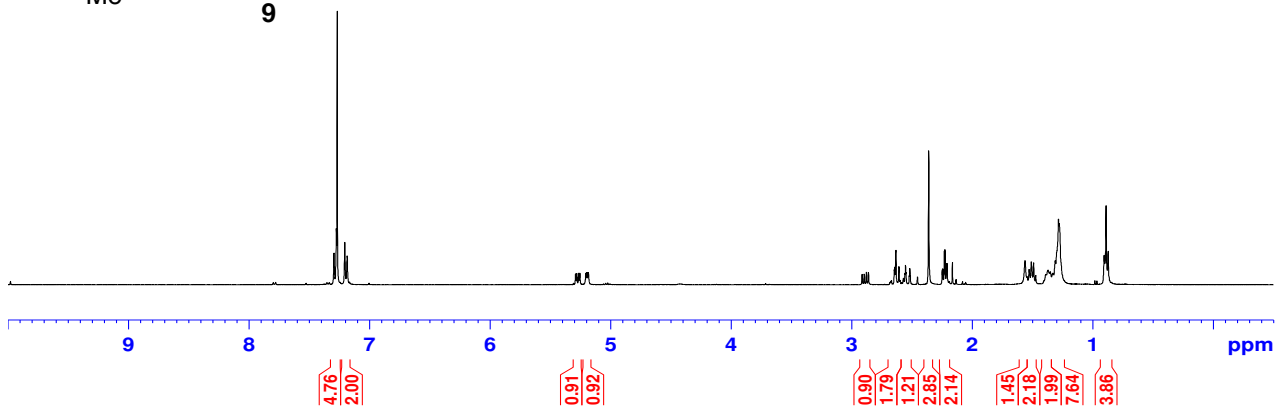

xun-3-78-2 13C 400B

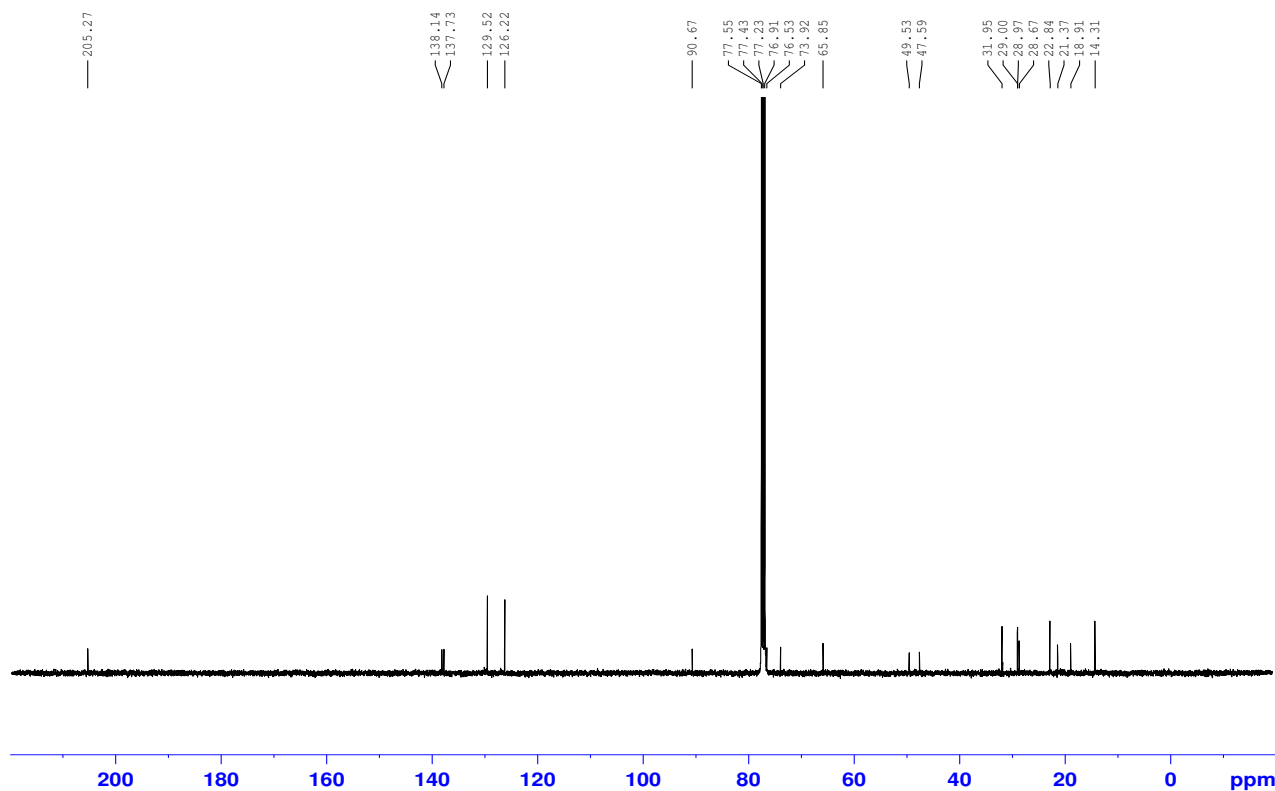

xun-3-78-1 400A  
 PROTON CDC13 C:\Bruker\TOPSPIN floreancig 2

7.299  
 7.279  
 7.270  
 7.196  
 7.176  
 4.617  
 4.609  
 4.590  
 4.581  
 4.552  
 4.549  
 4.545  
 4.540  
 4.523  
 4.519  
 4.516  
 2.793  
 2.764  
 2.757  
 2.728  
 2.685  
 2.682  
 2.678  
 2.648  
 2.640  
 2.621  
 2.618  
 2.613  
 2.608  
 2.605  
 2.581  
 2.576  
 2.572  
 2.568  
 2.354  
 2.258  
 2.253  
 2.240  
 2.235  
 2.222  
 2.217  
 1.568  
 1.541  
 1.523

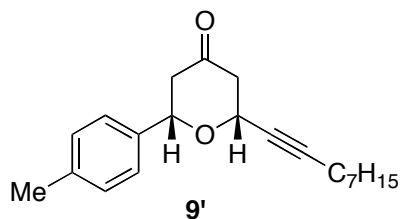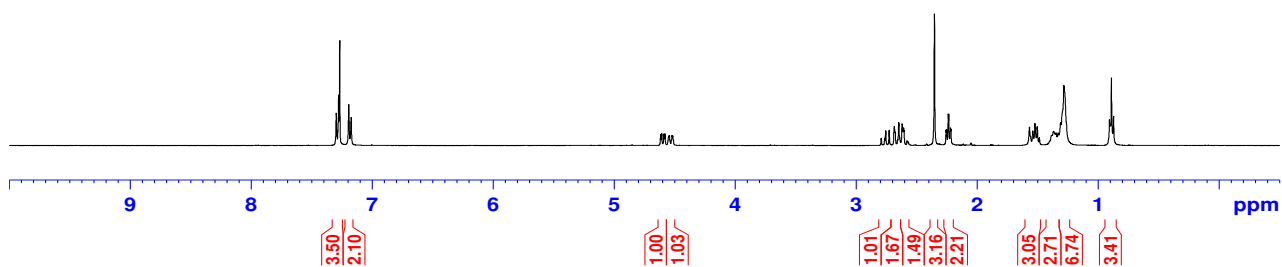

xun-3-78-1 13C 400B

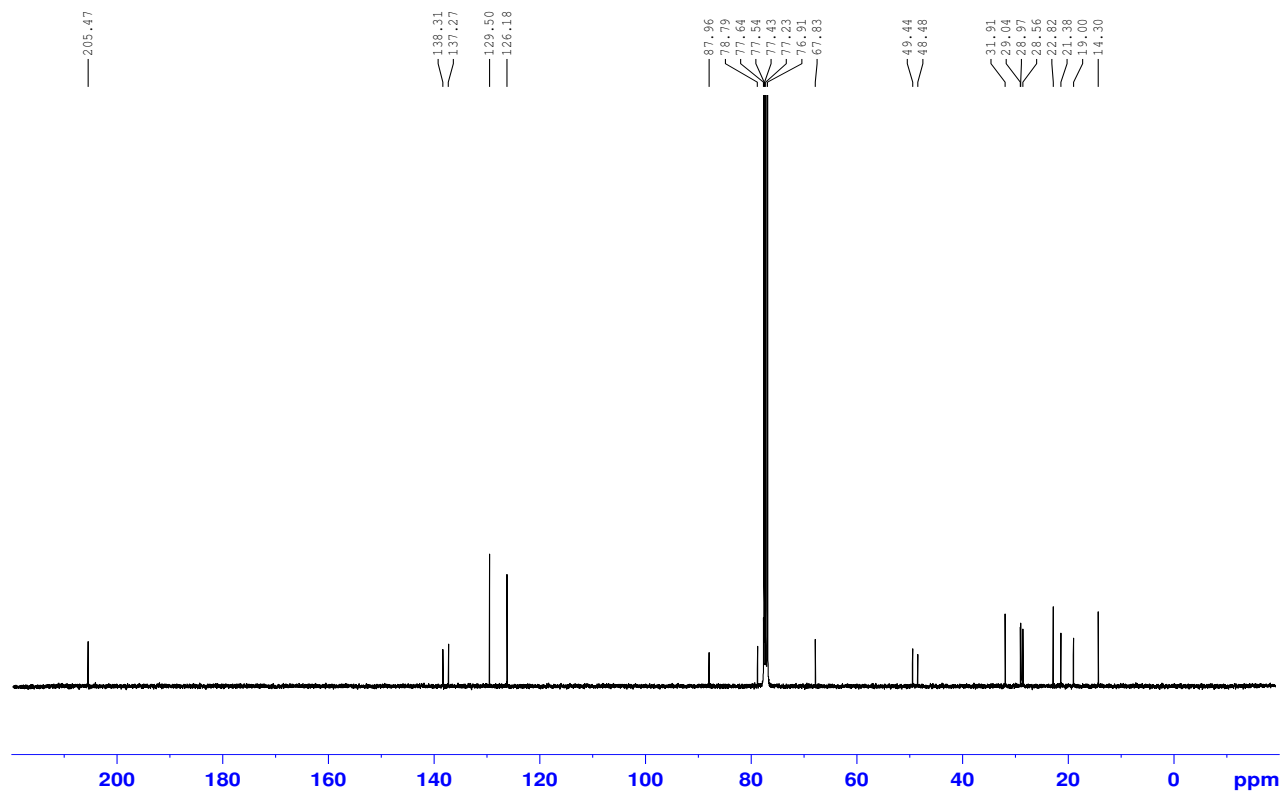

xun-1-259 1H 500

7.297  
7.280  
7.270  
6.898  
6.880

4.903  
4.899  
4.886  
4.759  
4.737  
4.472  
4.450  
4.346  
4.334  
4.320  
4.286  
4.272  
4.258  
4.244  
3.814  
2.732  
2.727  
2.718  
2.717  
2.715  
2.060  
1.601  
1.351  
1.336  
1.322

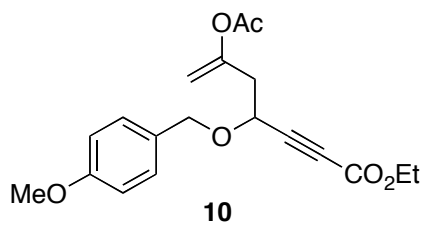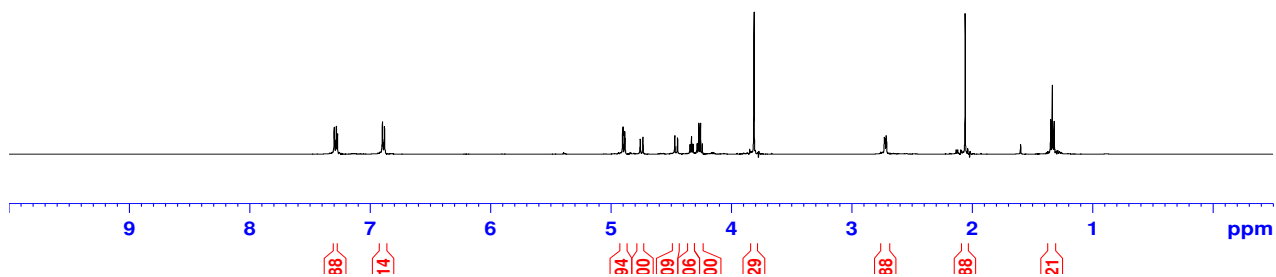

xun-1-259 13C 500

169.24  
159.68  
153.37  
150.94  
130.06  
129.09  
114.03  
105.26  
85.00  
78.23  
77.48  
77.23  
76.98  
71.06  
65.52  
62.42  
55.49  
39.46  
21.20  
14.22

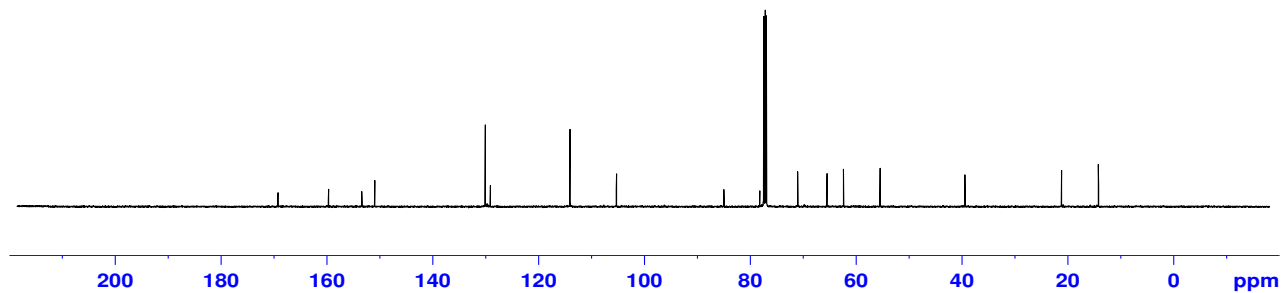

xun-3-79-2-3 110311 400A  
 PROTON CDCl3 C:\Bruker\TOPSPIN floreancig 15

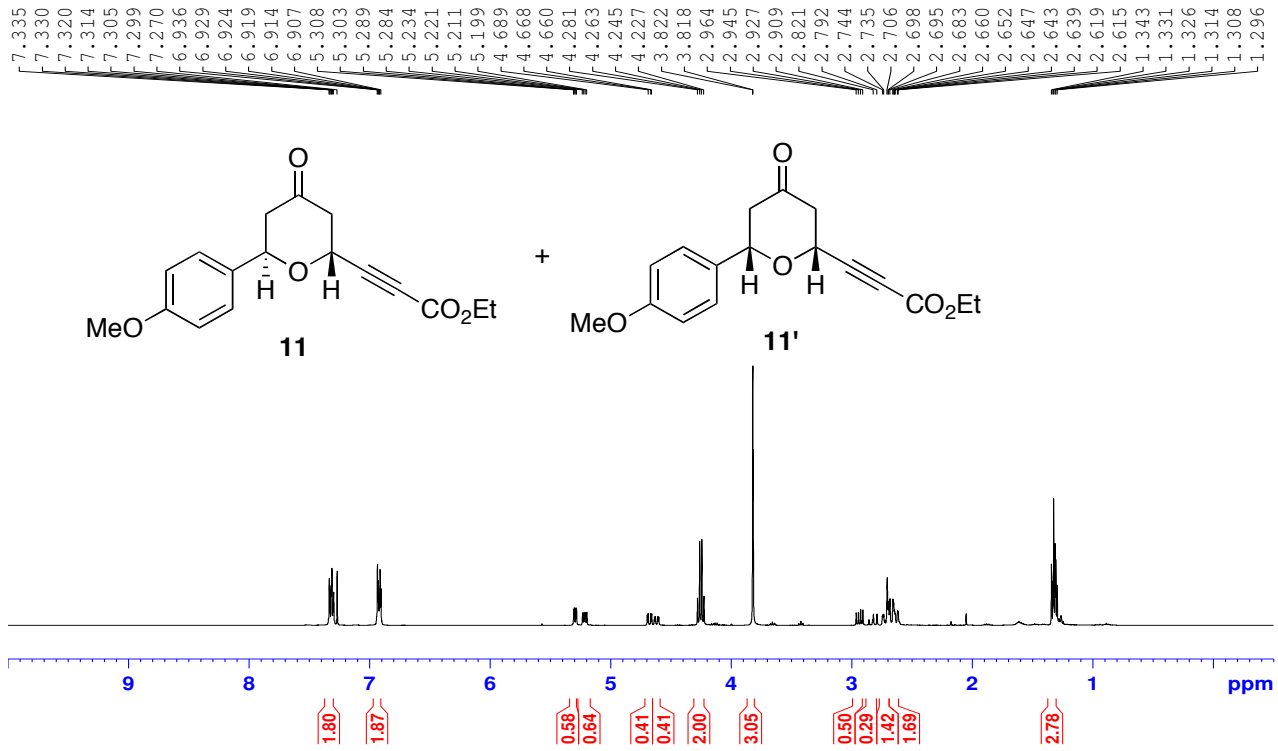

xun-3-79 13C 400B

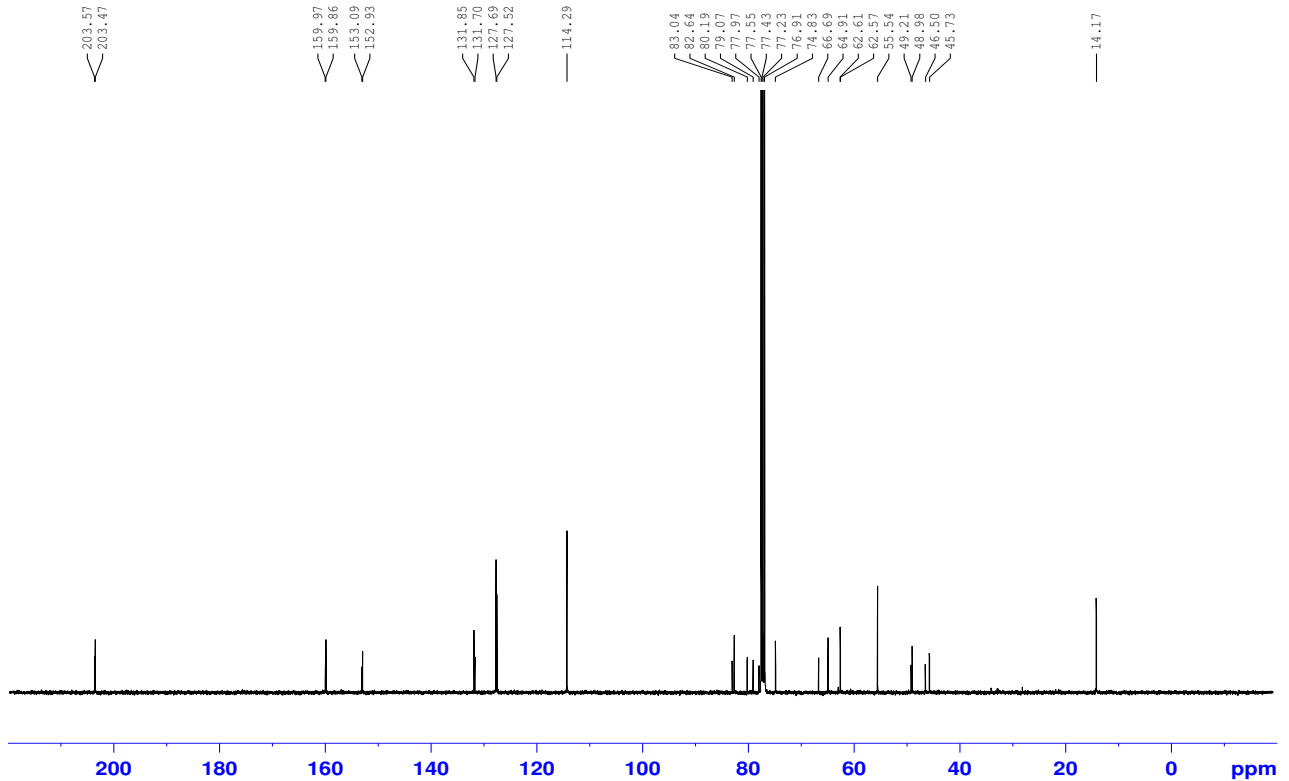

xun-1-75

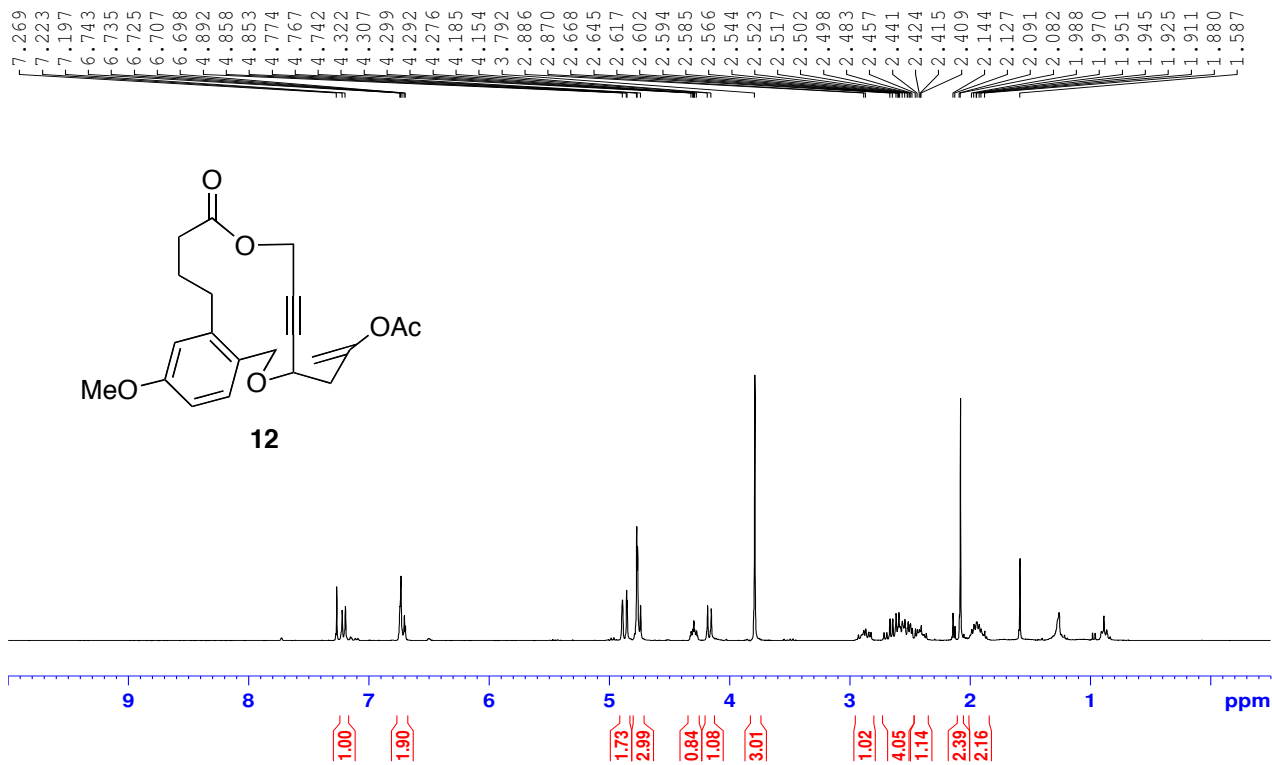

xun-1-75 13C

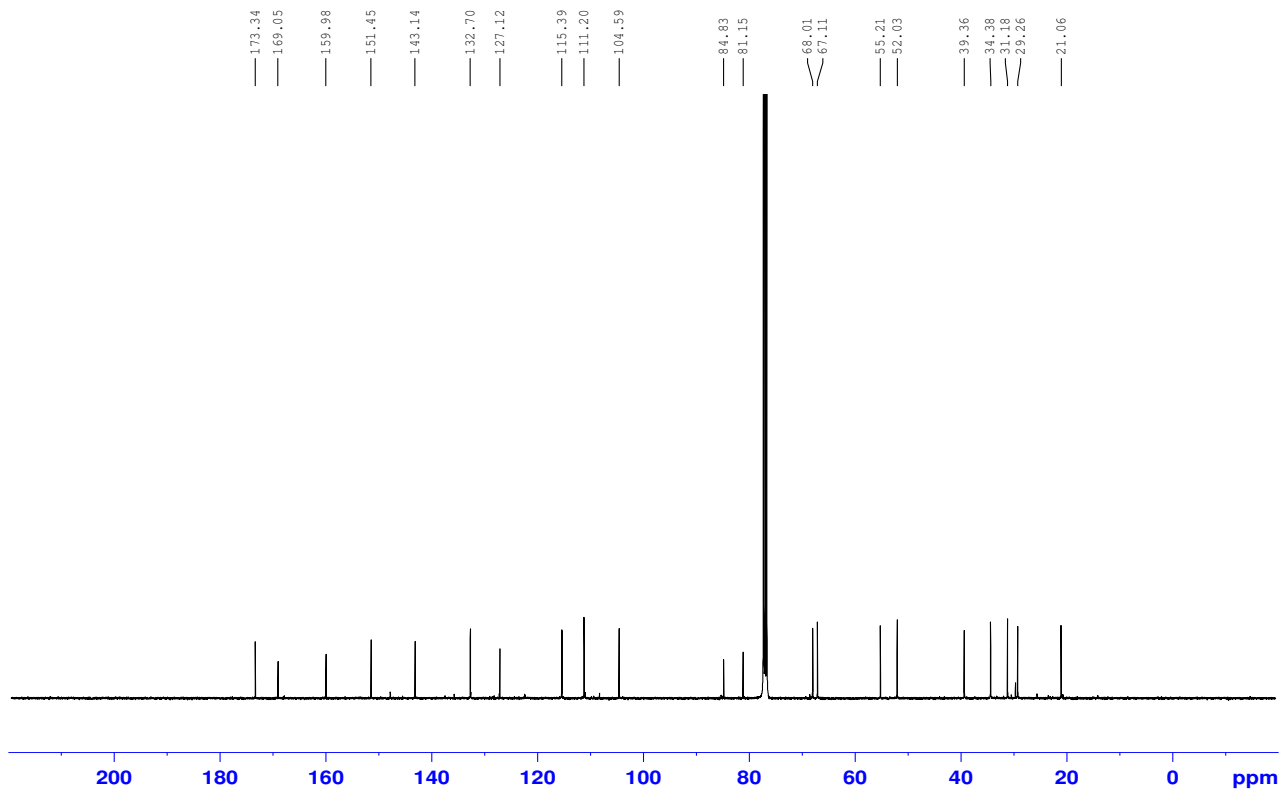



xun-1-76

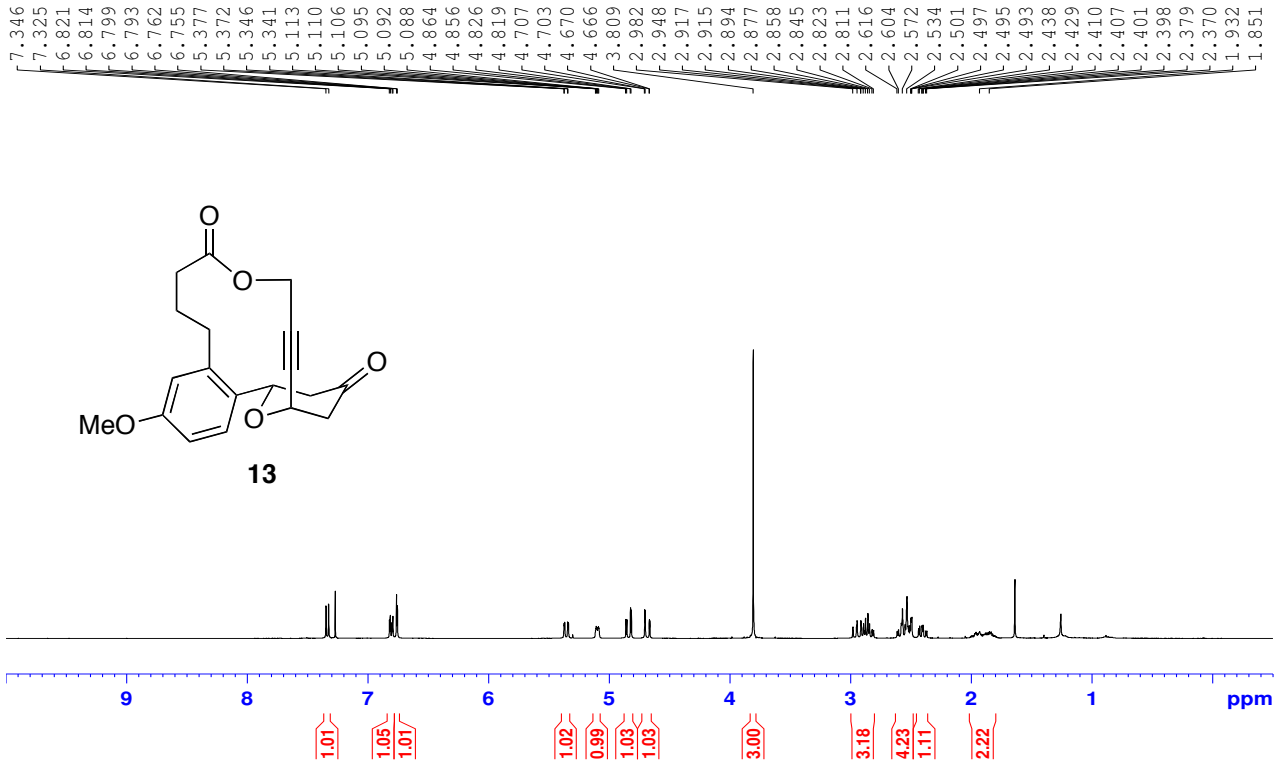

xun-1-76 13C

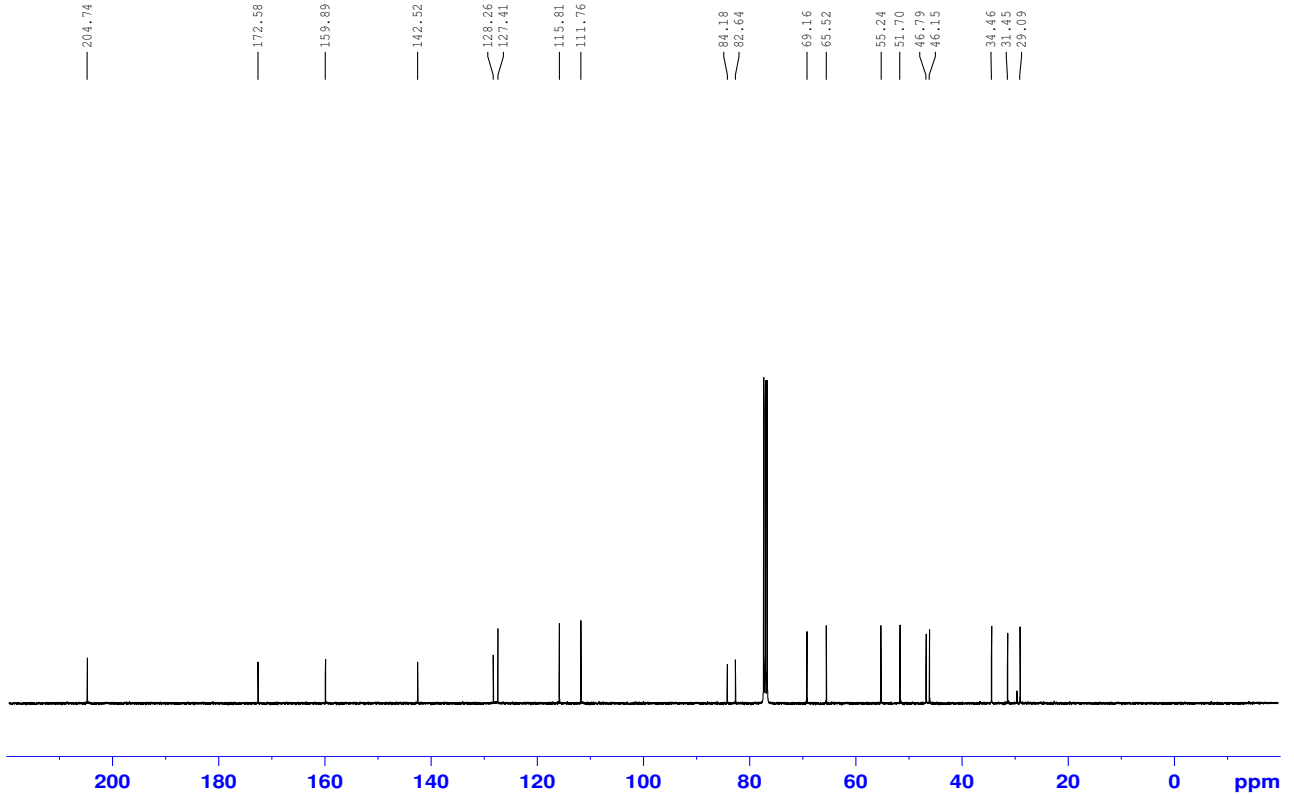

xun-1-107 400a

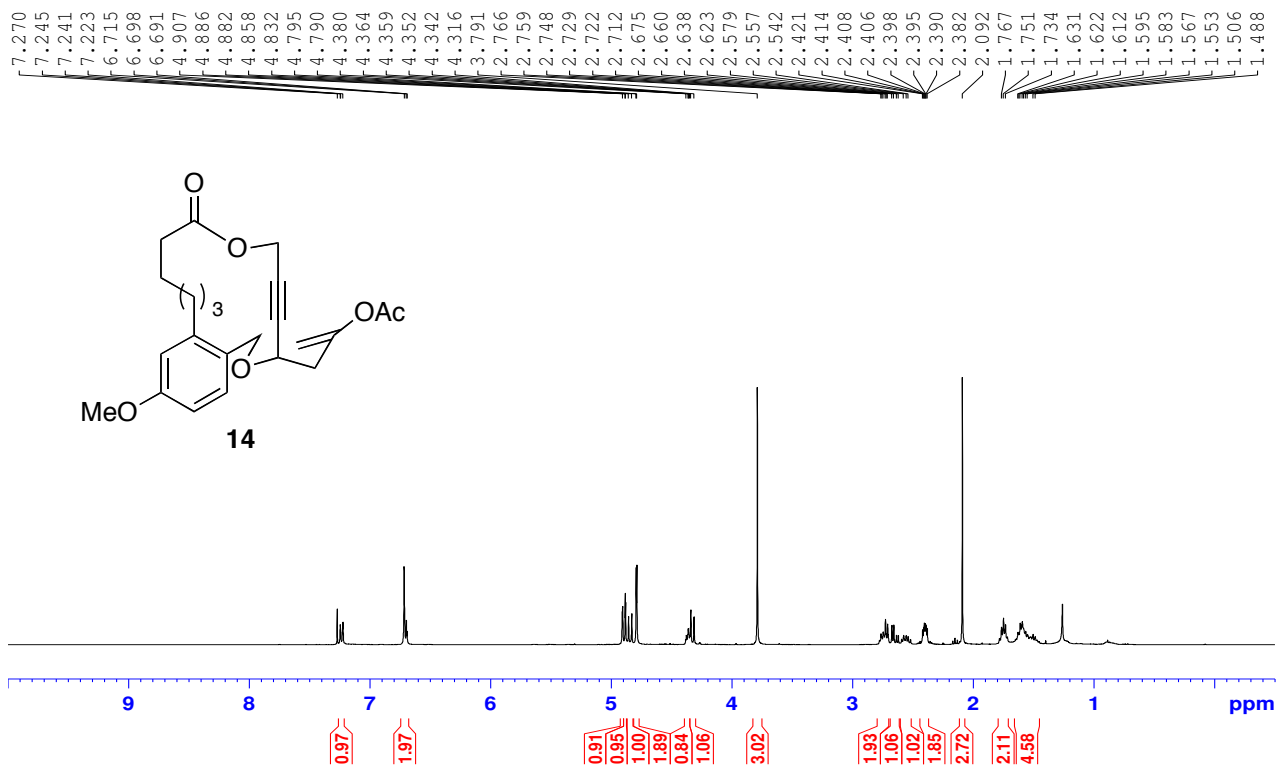

xun-1-107 400a C13

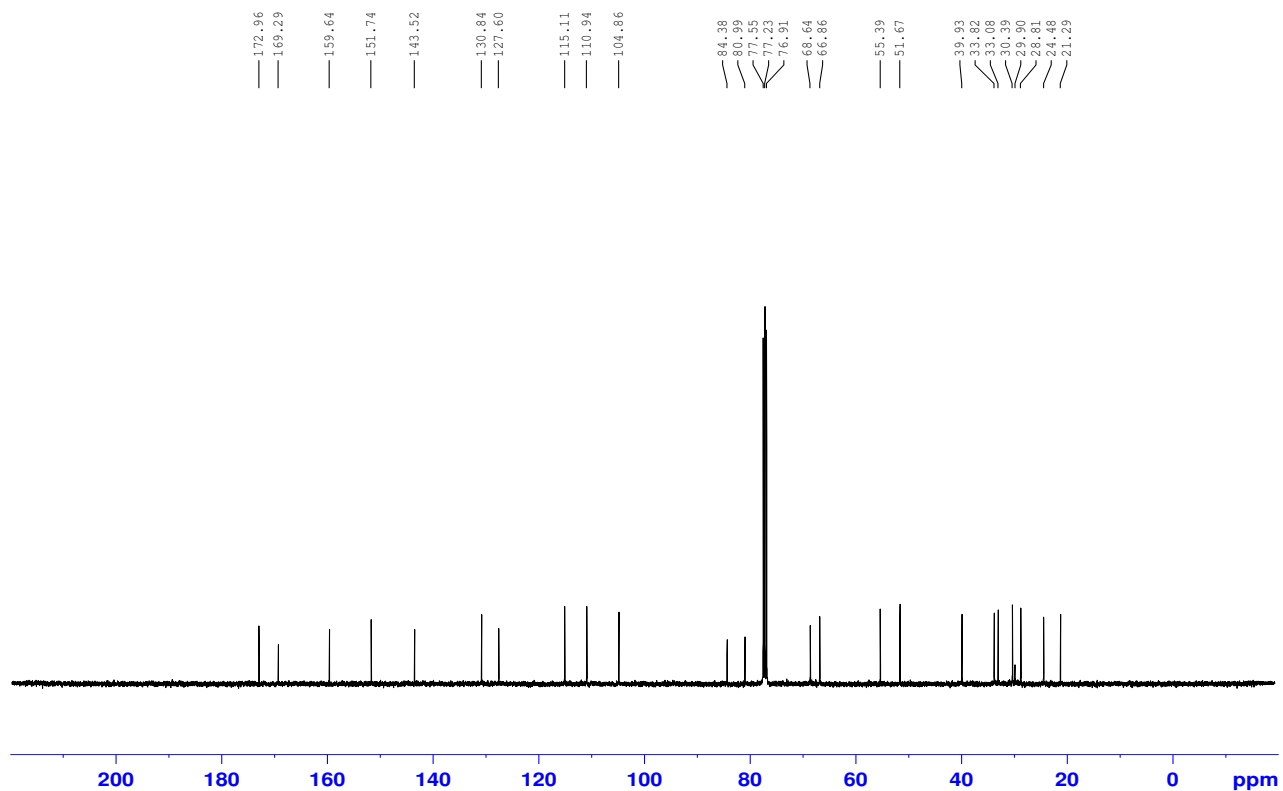

xun-1-108 H 400a

7.412  
7.390  
7.270  
6.814  
6.807  
6.793  
6.786  
6.714  
6.707  
5.449  
5.442  
5.420  
5.414  
5.266  
5.249  
4.852  
4.847  
4.814  
4.809  
4.746  
4.738  
4.707  
4.700  
3.804  
2.952  
2.934  
2.916  
2.898  
2.690  
2.662  
2.645  
2.631  
2.621  
2.616  
2.610  
2.594  
2.581  
2.560  
2.524  
2.408  
2.392  
2.376  
1.692  
1.676  
1.659  
1.654  
1.638  
1.629  
1.613  
1.526  
1.510  
1.491  
1.481  
1.473  
1.260

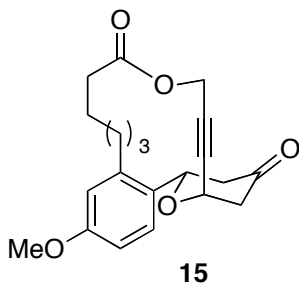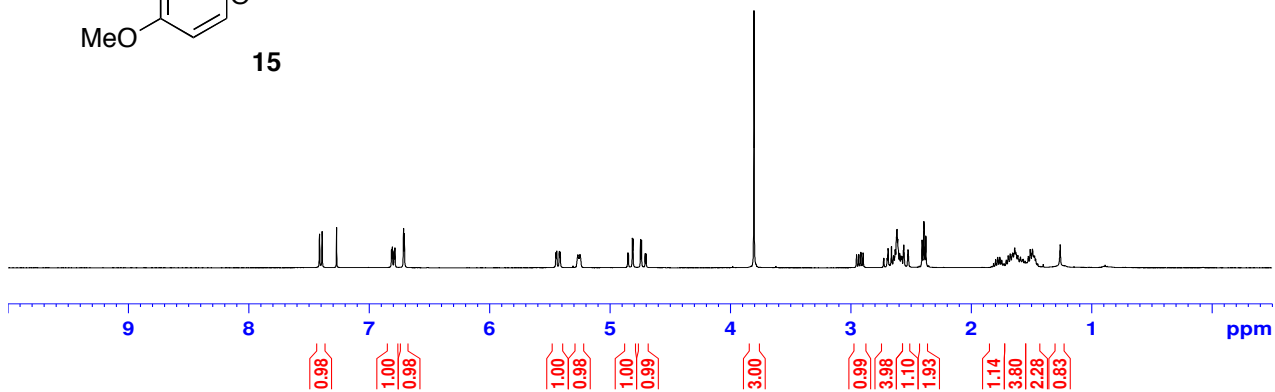

xun-1-108 13C 400a

204.87  
172.71  
159.66  
141.99  
129.95  
127.22  
115.02  
111.81  
83.15  
82.53  
77.54  
77.23  
76.91  
70.69  
65.73  
55.43  
51.62  
49.12  
46.57  
33.67  
33.16  
30.71  
28.90  
28.60  
24.39

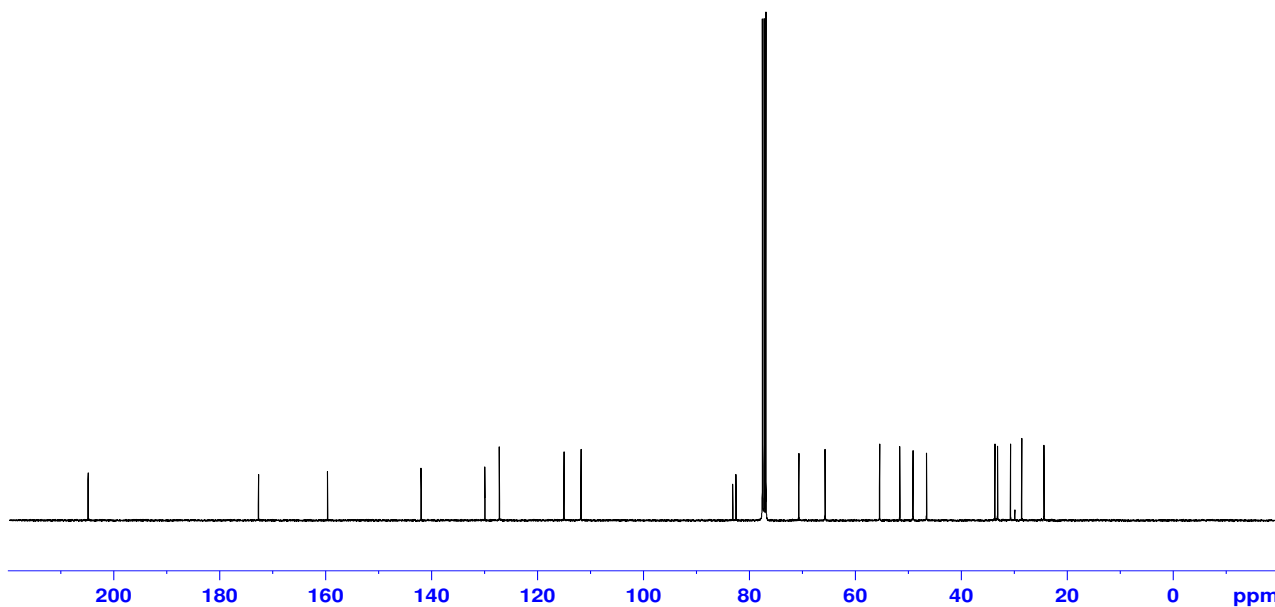

xun-3-52 400A  
 PROTON CDC13 C:\Bruker\TOPSPIN floreancig 14

7.289  
 7.270  
 6.730  
 6.716  
 4.887  
 4.878  
 4.805  
 4.778  
 4.757  
 4.375  
 4.363  
 4.348  
 3.798  
 2.767  
 2.749  
 2.729  
 2.711  
 2.696  
 2.681  
 2.658  
 2.641  
 2.633  
 2.616  
 2.398  
 2.382  
 2.365  
 2.060  
 1.718  
 1.702  
 1.685  
 1.617  
 1.599  
 1.578  
 1.384  
 1.368  
 1.327  
 1.262  
 1.101

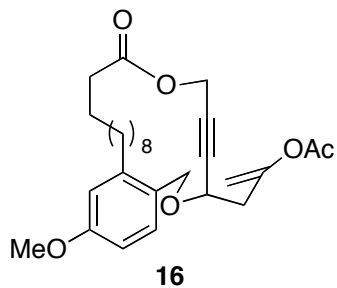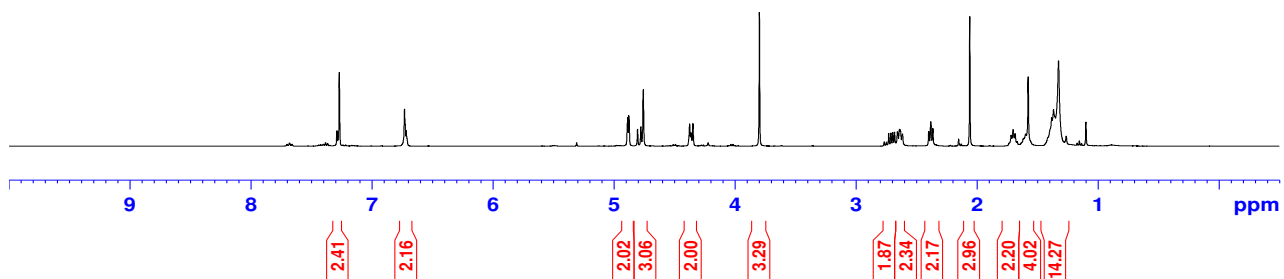

xun-3-52 13C 400B

173.41  
 169.30  
 159.52  
 151.79  
 143.42  
 130.88  
 127.74  
 115.13  
 111.12  
 104.86  
 85.22  
 80.71  
 77.55  
 77.43  
 77.23  
 76.71  
 69.50  
 67.07  
 55.41  
 52.42  
 40.17  
 33.91  
 33.15  
 31.48  
 29.20  
 28.20  
 27.76  
 27.65  
 27.53  
 27.15  
 24.50  
 21.26

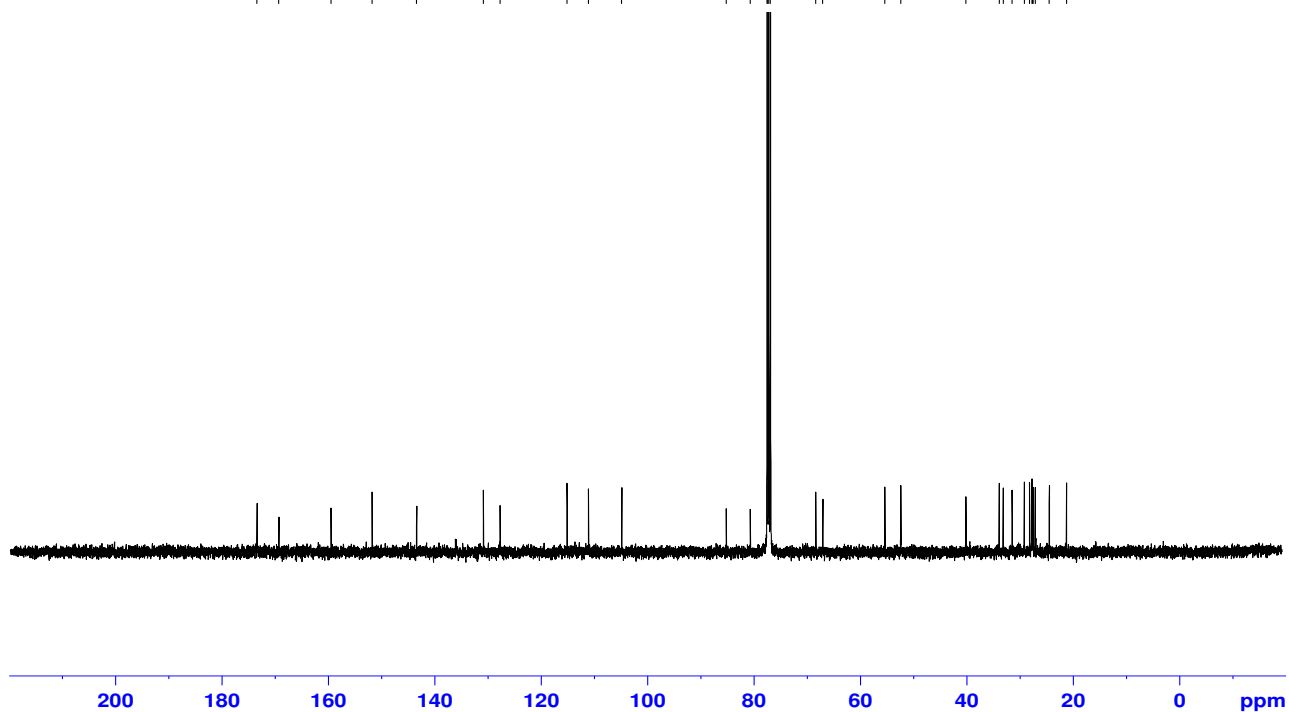

xun-3-53 400B

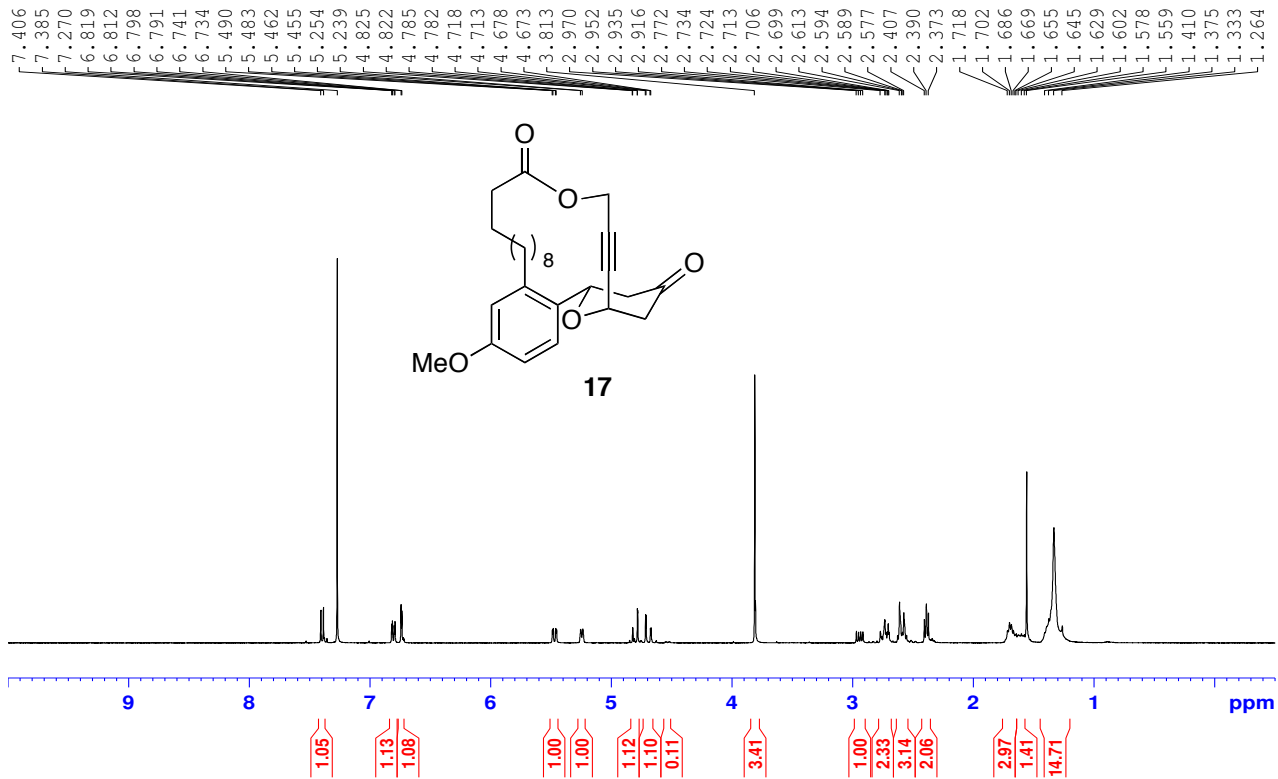

xun-3-53 13C 400B

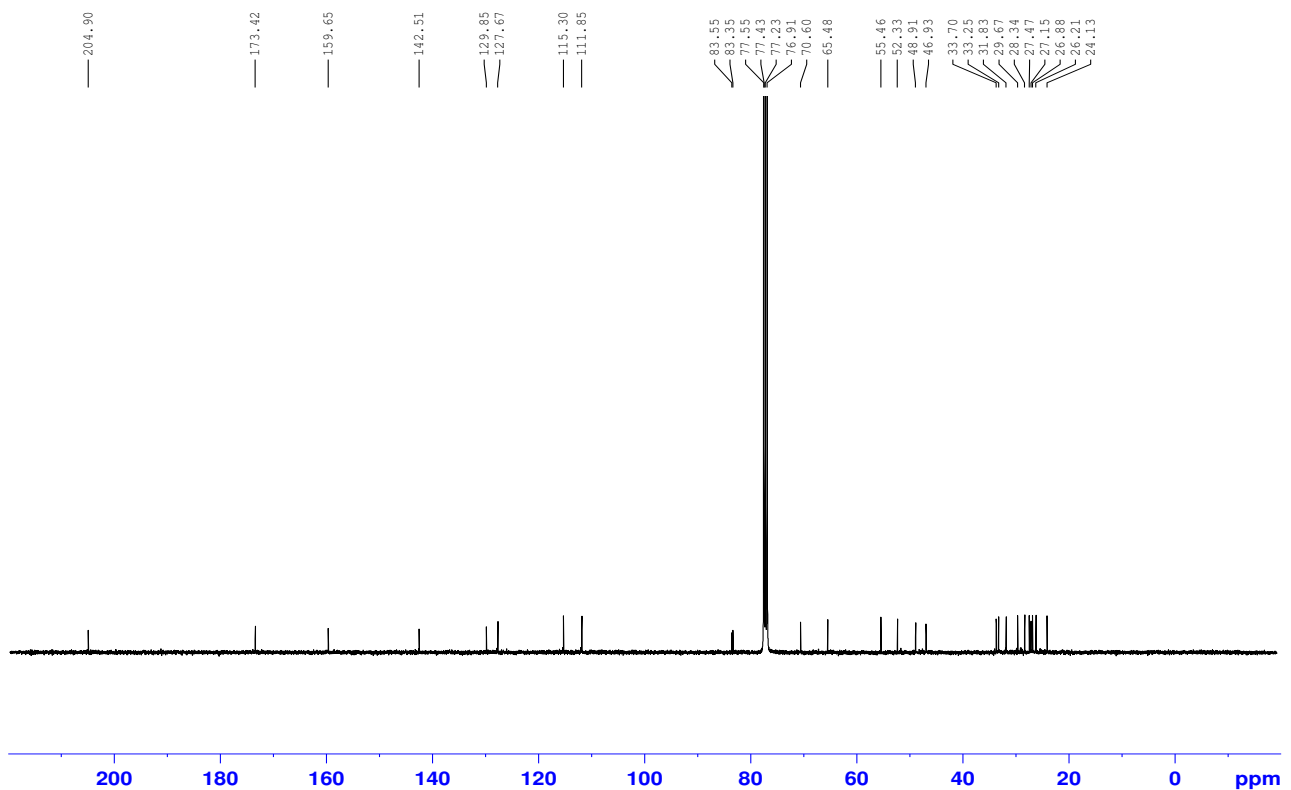

xun-2-222 1H NMR 400B

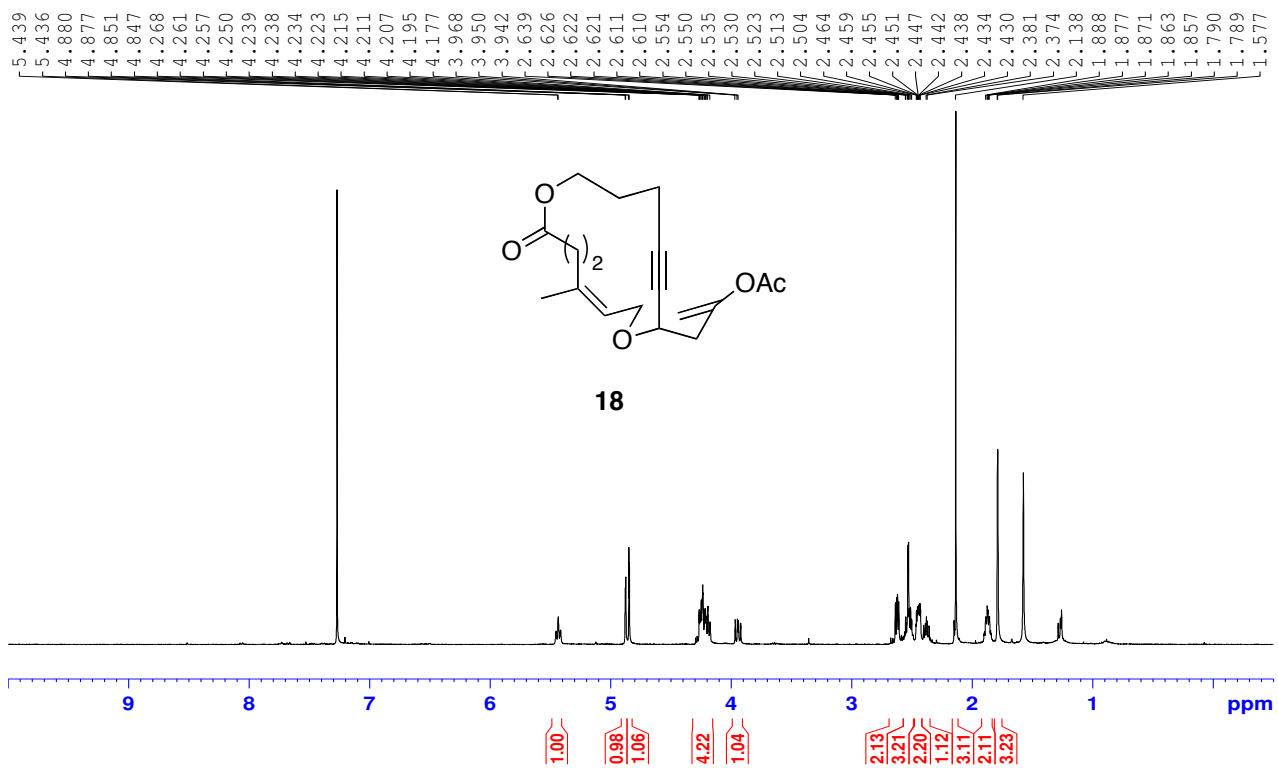

xun-2-222 13C NMR 400B

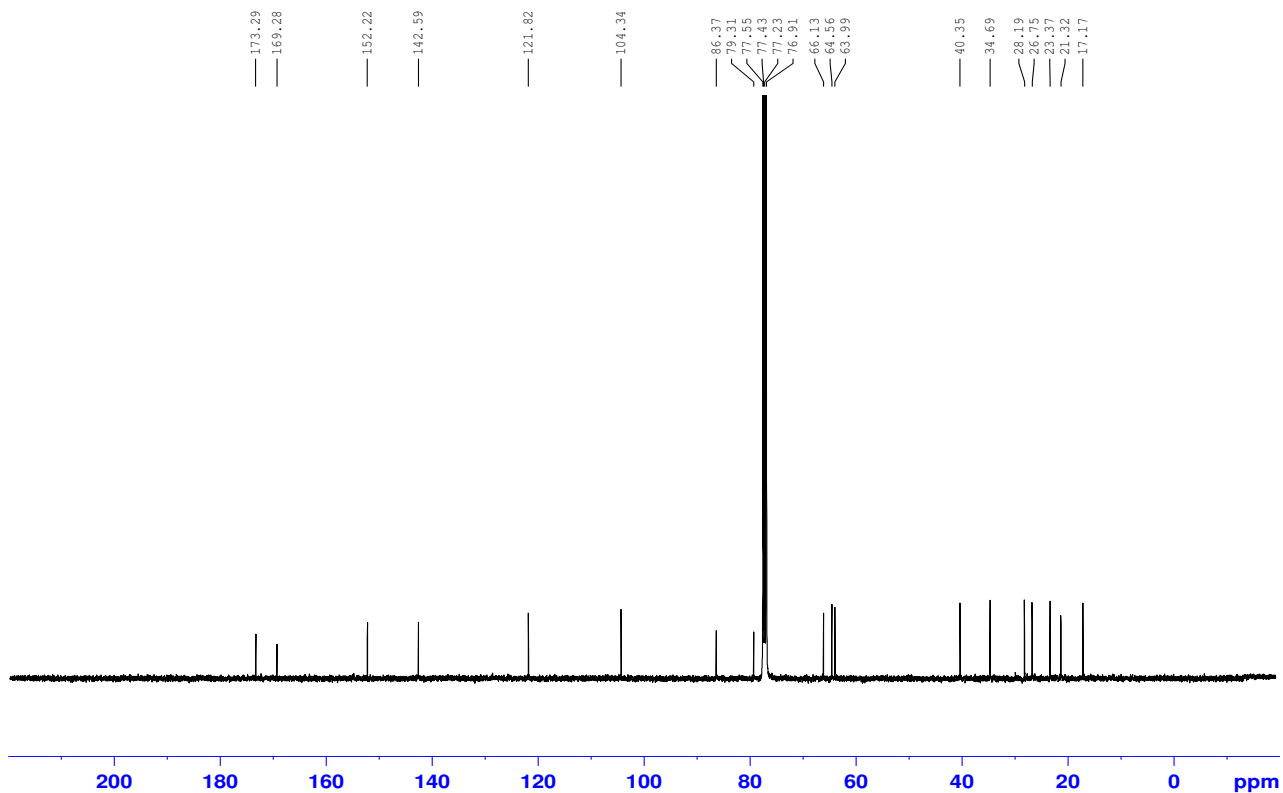

xun-2-227 400B

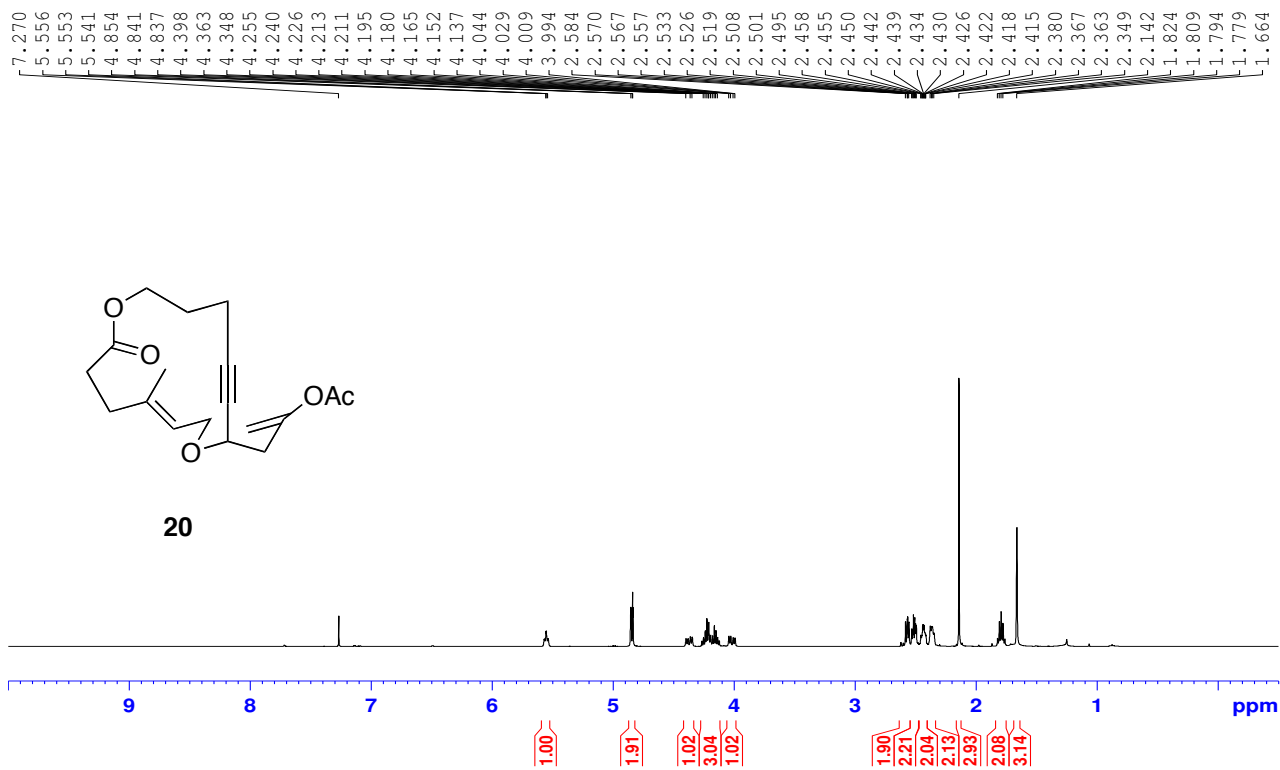

xun-2-227 13C 400B

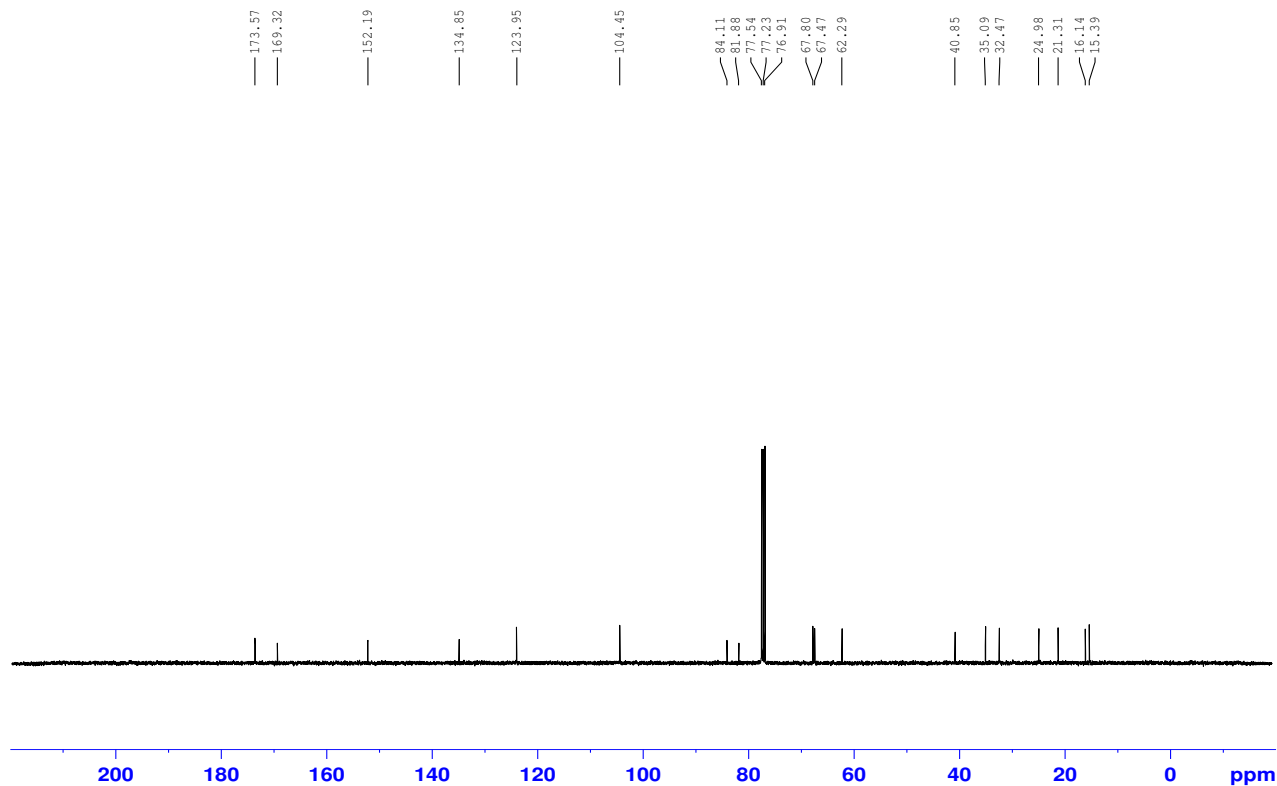

xun-2-224 400B

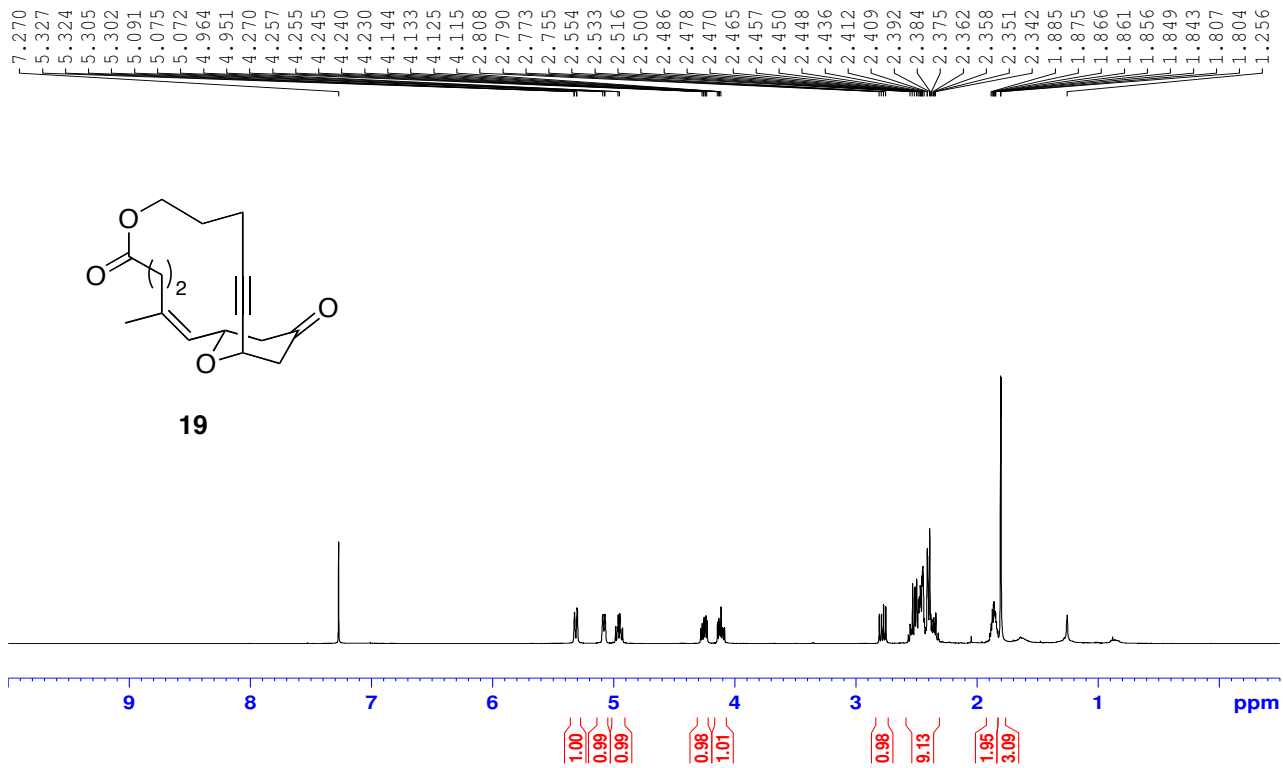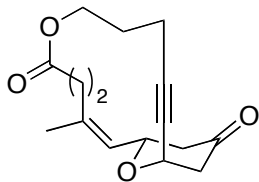

19

xun-2-224 13C 400B

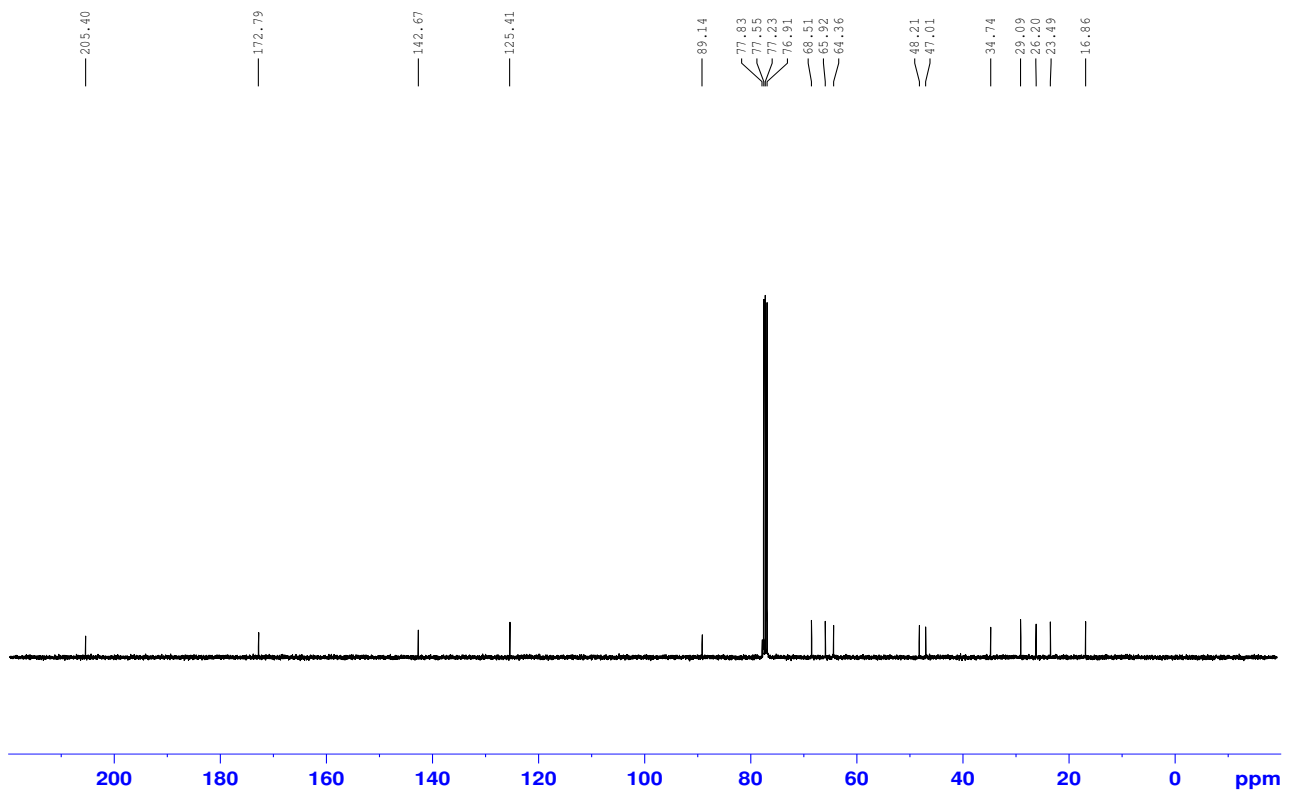



xun-3-224-1 1H NMR 400B

7.388  
7.385  
7.367  
7.343  
7.326  
7.306  
7.285  
7.270  
5.841  
5.824  
5.808  
4.895  
4.869  
4.865  
4.418  
4.401  
4.388  
4.371  
4.351  
4.340  
4.330  
4.322  
4.317  
4.309  
4.293  
4.275  
4.202  
4.185  
4.172  
4.155  
2.681  
2.663  
2.648  
2.640  
2.621  
2.523  
2.519  
2.506  
2.483  
2.470  
2.365  
2.355  
2.344  
2.334  
2.323  
2.313  
2.127  
1.923  
1.909  
1.895  
1.887  
1.874  
1.741  
1.708  
1.560

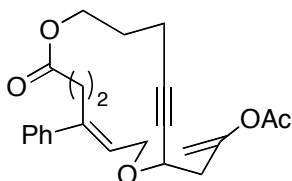

21

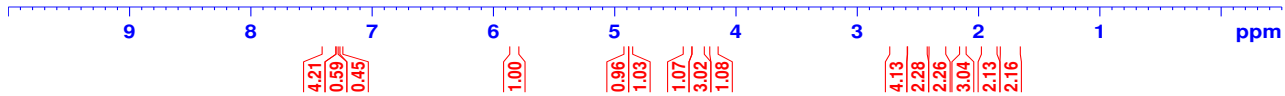

xun-3-224 13C NMR 400B

174.18  
169.27  
152.11  
143.38  
141.65  
128.56  
127.60  
126.68  
125.24  
104.55  
85.37  
80.02  
77.55  
77.44  
77.23  
76.91  
66.23  
64.89  
63.51  
40.29  
33.52  
28.84  
25.85  
24.07  
21.32  
16.19

200 180 160 140 120 100 80 60 40 20 0 ppm

xun-3-225 1H NMR 032312 400B

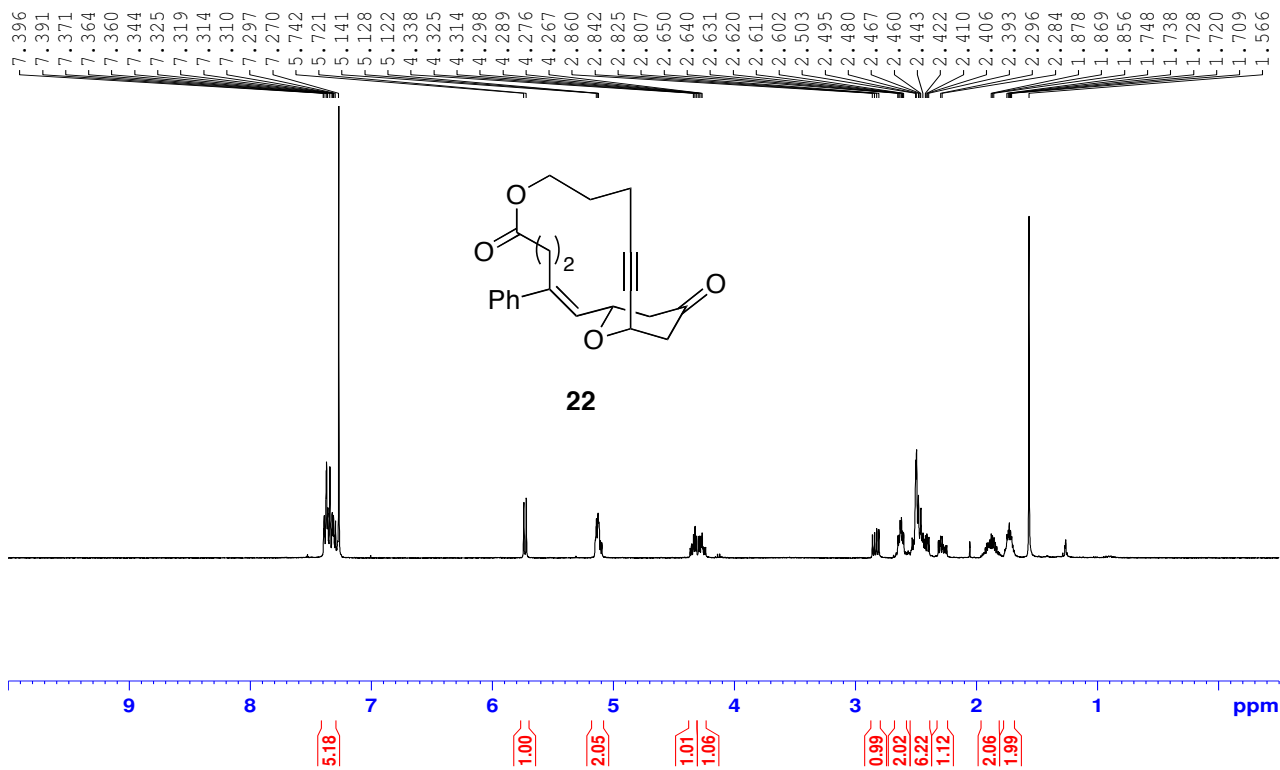

xun-3-225 13C NMR 400B

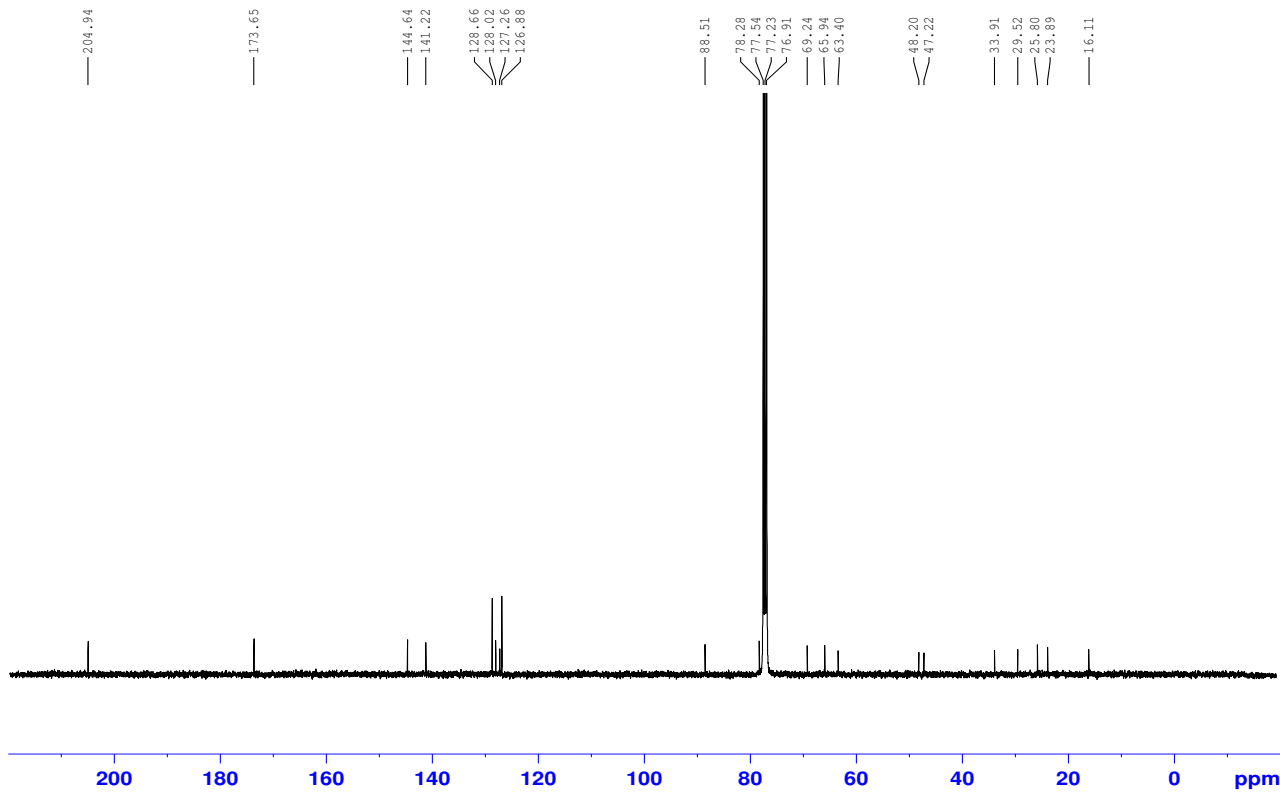

xun-1-175 1H 400B

7.270  
4.852  
4.849  
4.828  
4.272  
4.268  
4.244  
4.239  
4.235  
4.199  
4.194  
4.189  
4.135  
4.130  
4.121  
4.114  
4.095  
4.088  
4.079  
4.070  
4.061  
2.572  
2.567  
2.553  
2.548  
2.480  
2.470  
2.456  
2.224  
2.219  
2.195  
2.189  
2.183  
2.166  
2.155  
2.140  
2.134  
2.097  
2.050  
1.900  
1.892  
1.863  
1.816  
1.811  
1.797  
1.738  
1.732  
1.729  
1.723  
1.713  
1.705  
1.698  
1.687  
1.625  
1.256

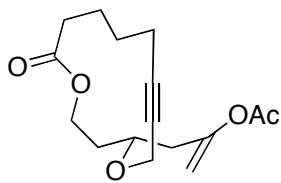

23

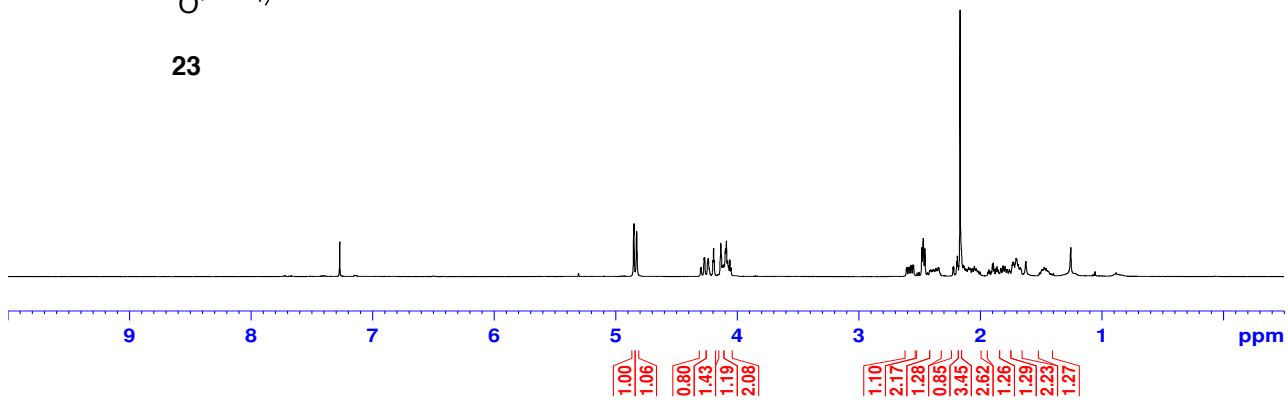

xun-1-175 13C NMR 500

173.83  
169.21  
153.03  
104.33  
86.04  
77.48  
77.23  
77.10  
76.98  
69.65  
60.53  
56.75  
37.85  
34.99  
33.79  
29.90  
27.72  
23.52  
21.31  
17.92

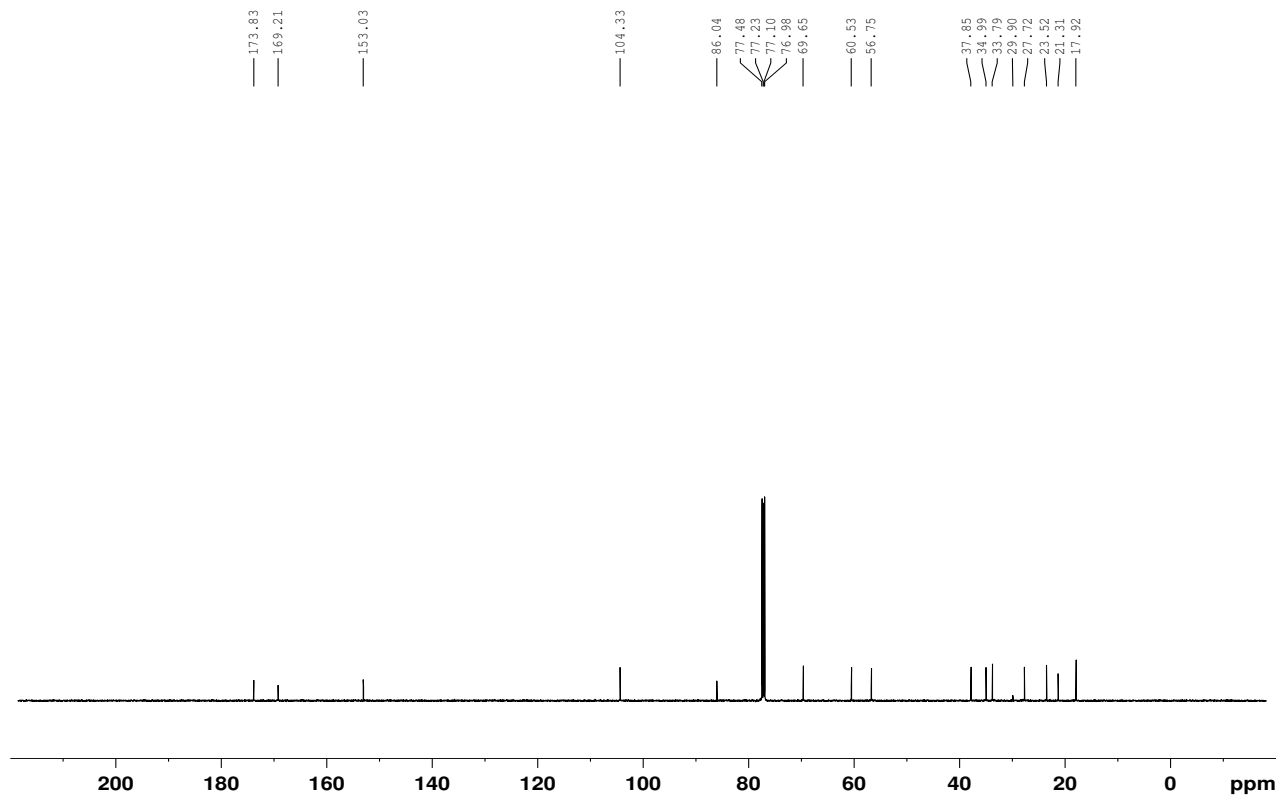

xun-1-177-1011 400B

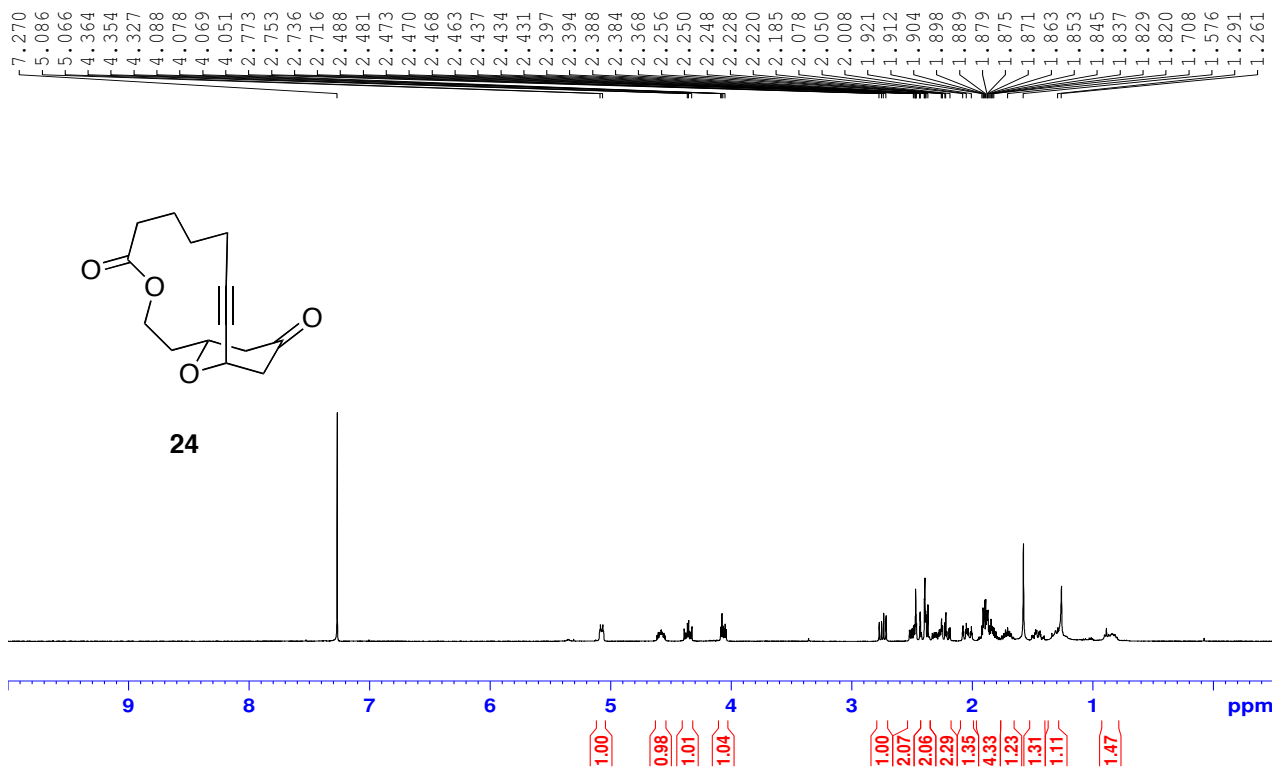

xun-1-177 13C NMR 500

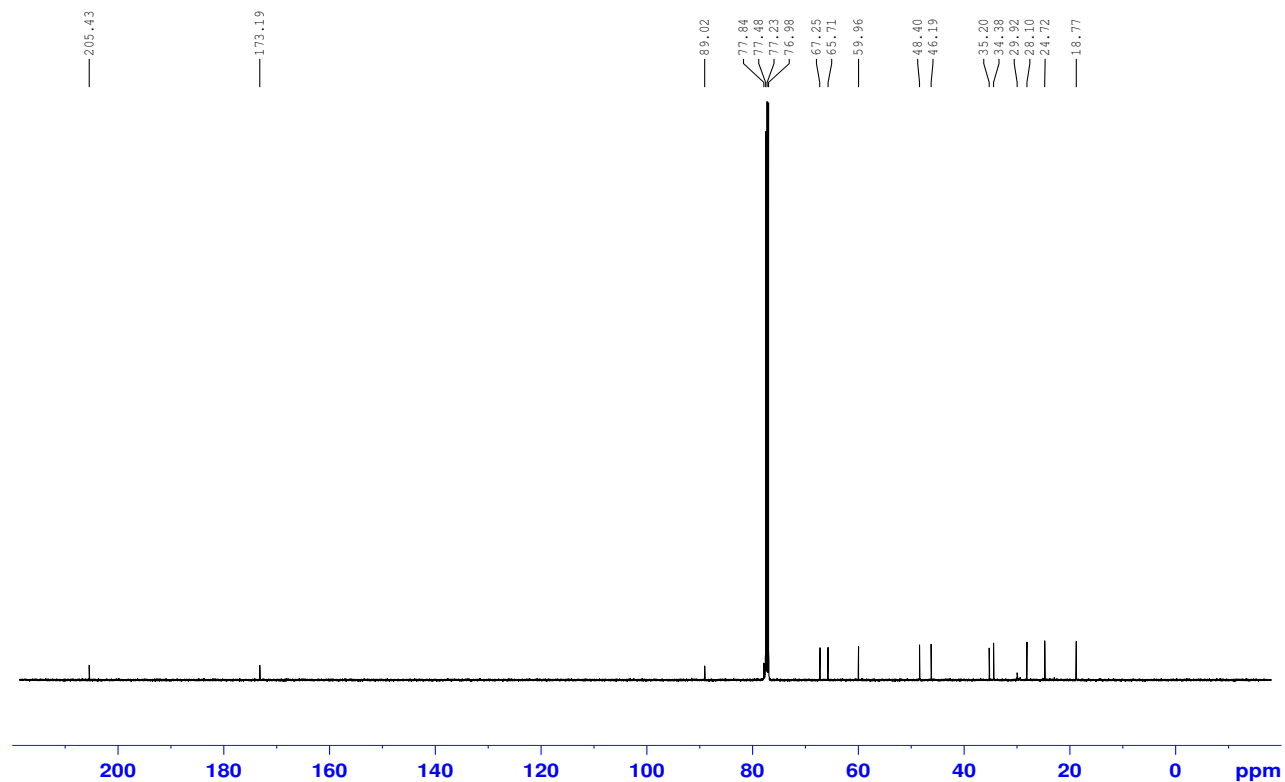

xun-2-274 1H 400B

7.270  
4.804  
4.339  
4.330  
4.326  
4.317  
4.304  
4.299  
4.294  
4.263  
4.258  
4.253  
4.145  
4.138  
4.119  
4.112  
4.067  
4.062  
4.056  
4.026  
4.021  
3.859  
3.844  
3.828  
2.476  
2.474  
2.464  
2.459  
2.445  
2.417  
2.404  
2.397  
2.390  
2.384  
2.374  
2.370  
2.358  
2.163  
2.150  
1.951  
1.937  
1.934  
1.920  
1.907  
1.893  
1.879  
1.873  
1.859  
1.798  
1.791  
1.784  
1.779  
1.767  
1.765  
1.694

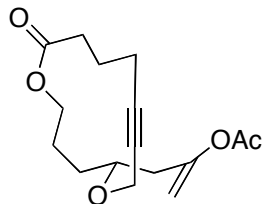

25

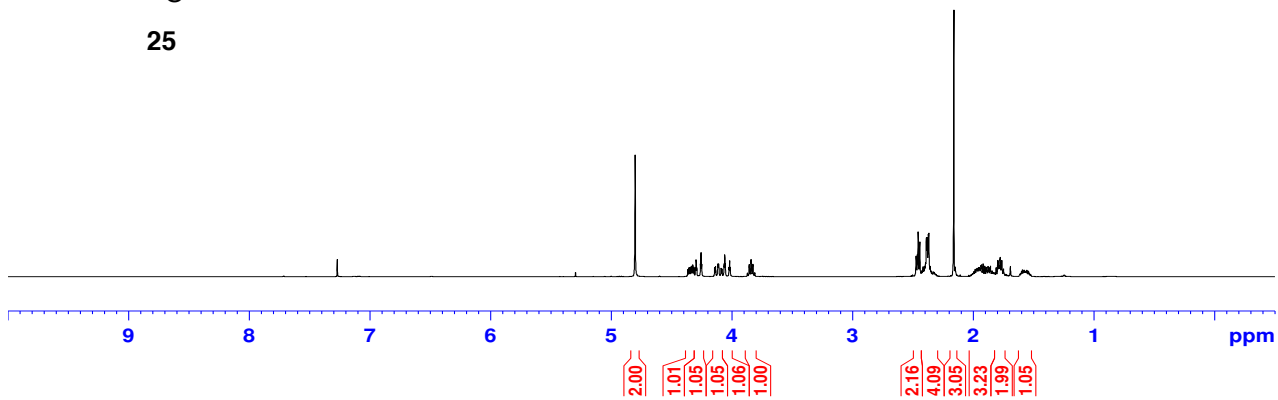

xun-2-274 13C NMR 400B

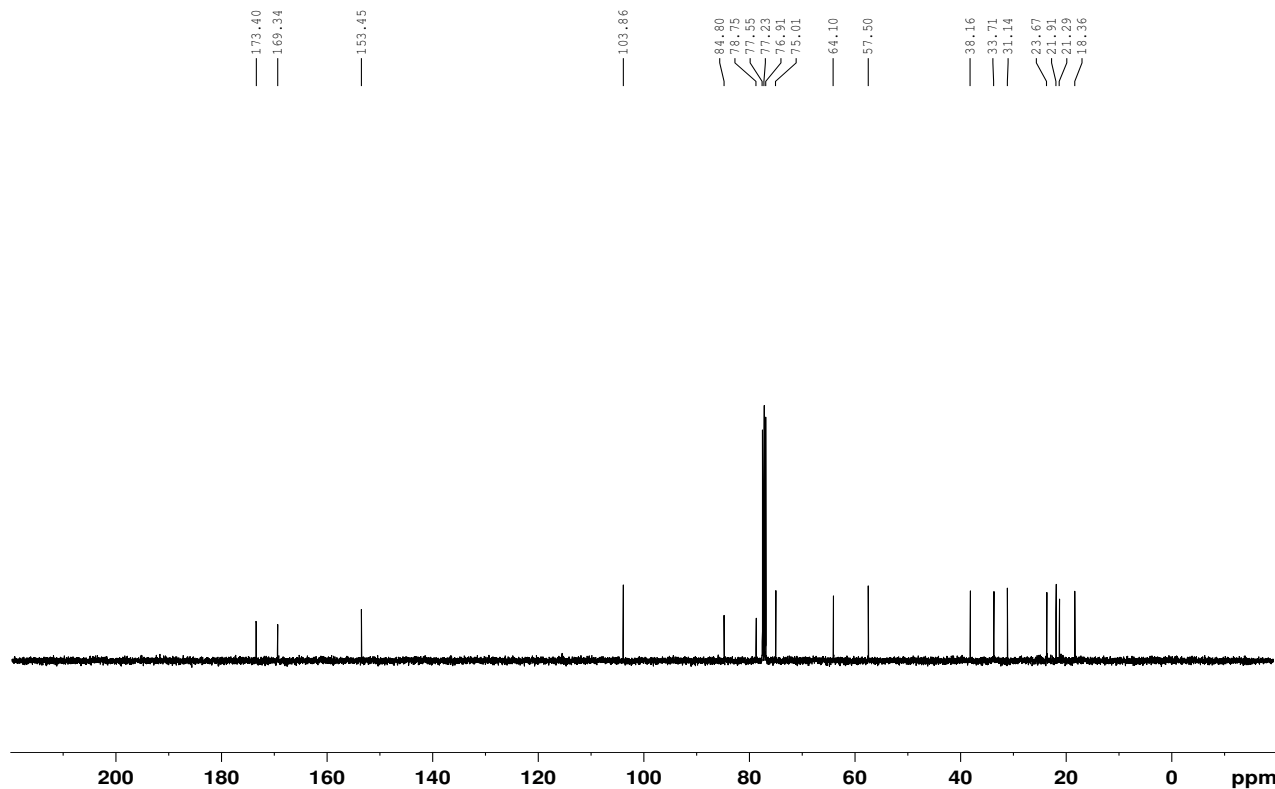

xun-2-275 400B

7.270  
5.066  
5.048  
4.418  
4.415  
3.972  
3.948  
3.944  
3.921  
2.760  
2.741  
2.724  
2.705  
2.515  
2.508  
2.493  
2.486  
2.429  
2.393  
2.376  
2.373  
2.370  
2.366  
2.363  
2.356  
2.350  
2.342  
2.336  
2.329  
2.324  
2.319  
2.312  
2.309  
2.305  
2.302  
2.300  
2.271  
2.238  
2.232  
2.211  
2.205  
2.174  
2.009  
1.862  
1.841  
1.826  
1.640  
1.634  
1.628  
1.612  
1.606  
1.588  
1.571  
1.261

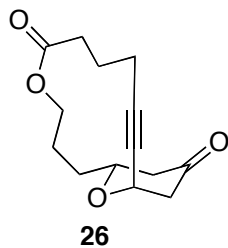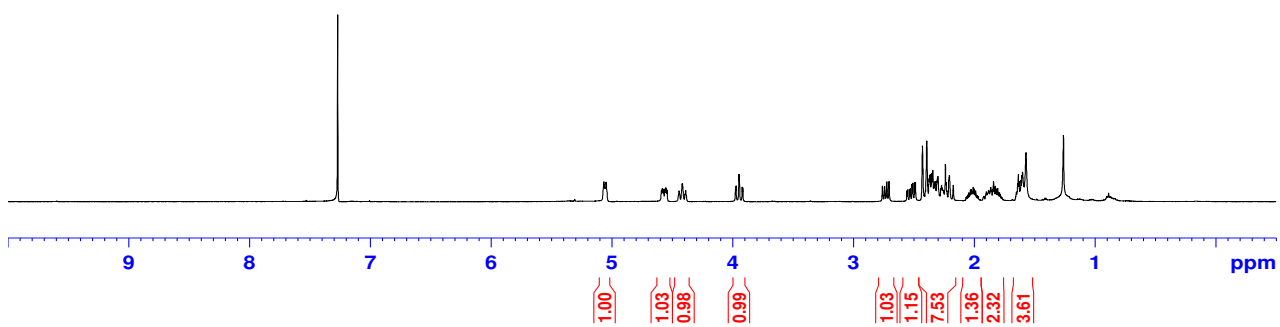

xun-2-275 0823 13C 400B

205.74

173.79

87.56  
78.62  
77.55  
77.43  
77.23  
76.91  
70.90  
67.03  
65.62

49.23  
46.97

35.54  
33.05

23.28  
21.11  
18.75

200 180 160 140 120 100 80 60 40 20 0 ppm

xun-2-89 1H NMR 400B

7.270  
4.841  
4.296  
4.267  
4.256  
4.251  
4.239  
4.229  
4.223  
4.212  
4.196  
4.186  
4.178  
4.168  
4.158  
4.149  
4.051  
4.036  
4.019  
2.476  
2.462  
2.358  
2.341  
2.323  
2.293  
2.283  
2.278  
2.162  
2.140  
1.920  
1.910  
1.902  
1.892  
1.886  
1.875  
1.859  
1.742  
1.725  
1.714  
1.708  
1.698  
1.680  
1.535  
1.515  
1.501  
1.492  
1.408  
1.401  
1.386  
1.373  
1.359  
1.348  
1.341  
1.327  
1.252

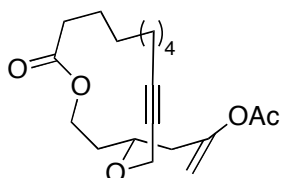

27

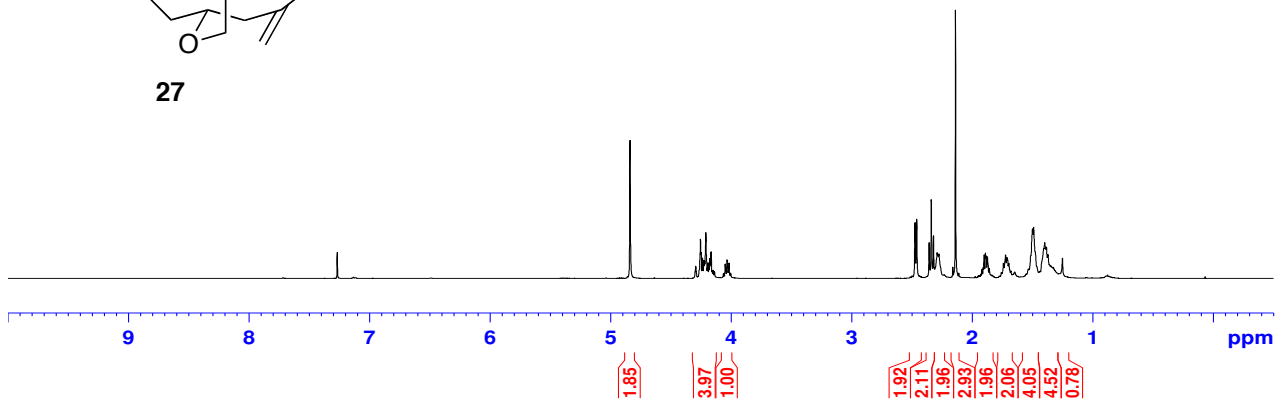

xun-2-89 13C NMR 400B

174.08  
169.22  
152.83  
104.46  
86.89  
77.55  
77.23  
76.91  
76.43  
70.70  
60.78  
55.94  
36.62  
33.90  
33.33  
27.42  
26.50  
26.25  
24.00  
21.33  
18.16

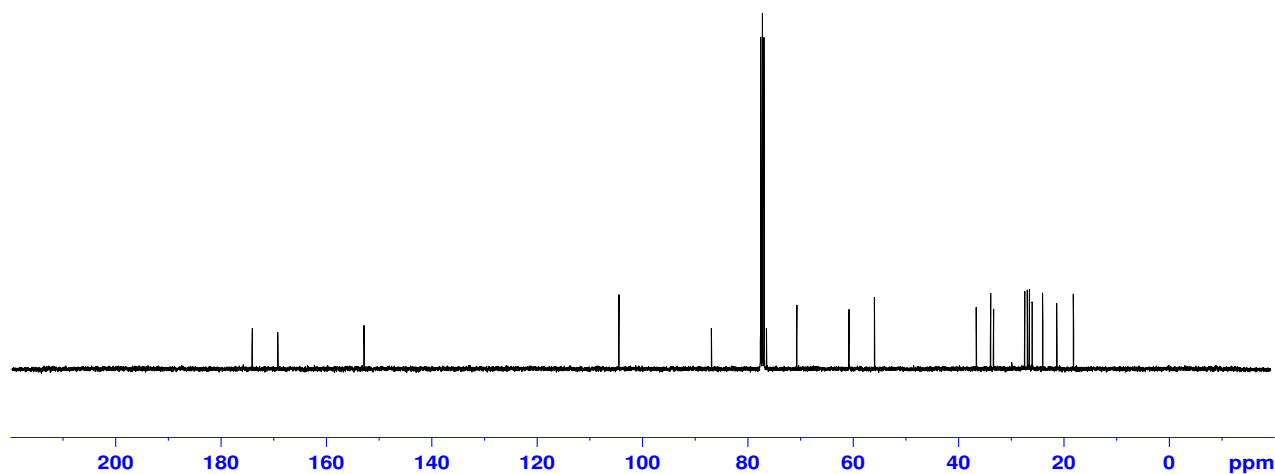

xun-3-66 110411 400B

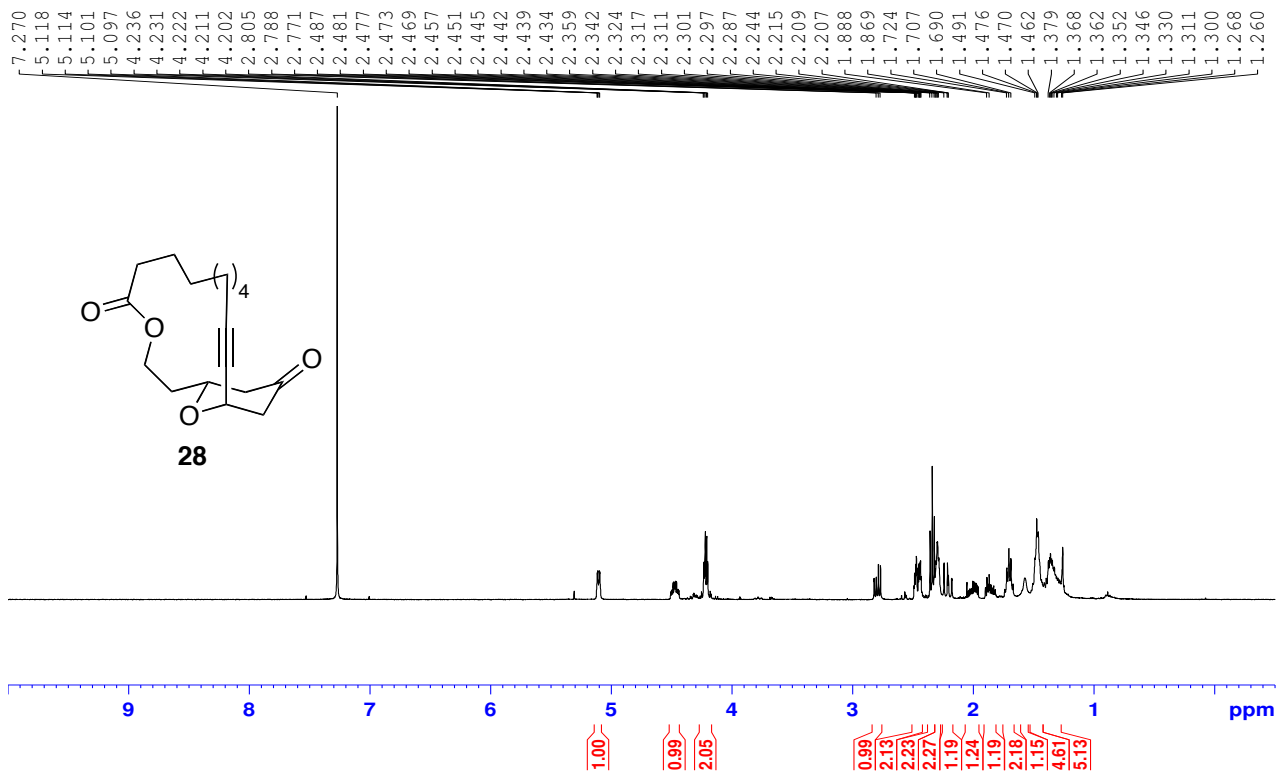

xun-3-66 110411 13C 400B

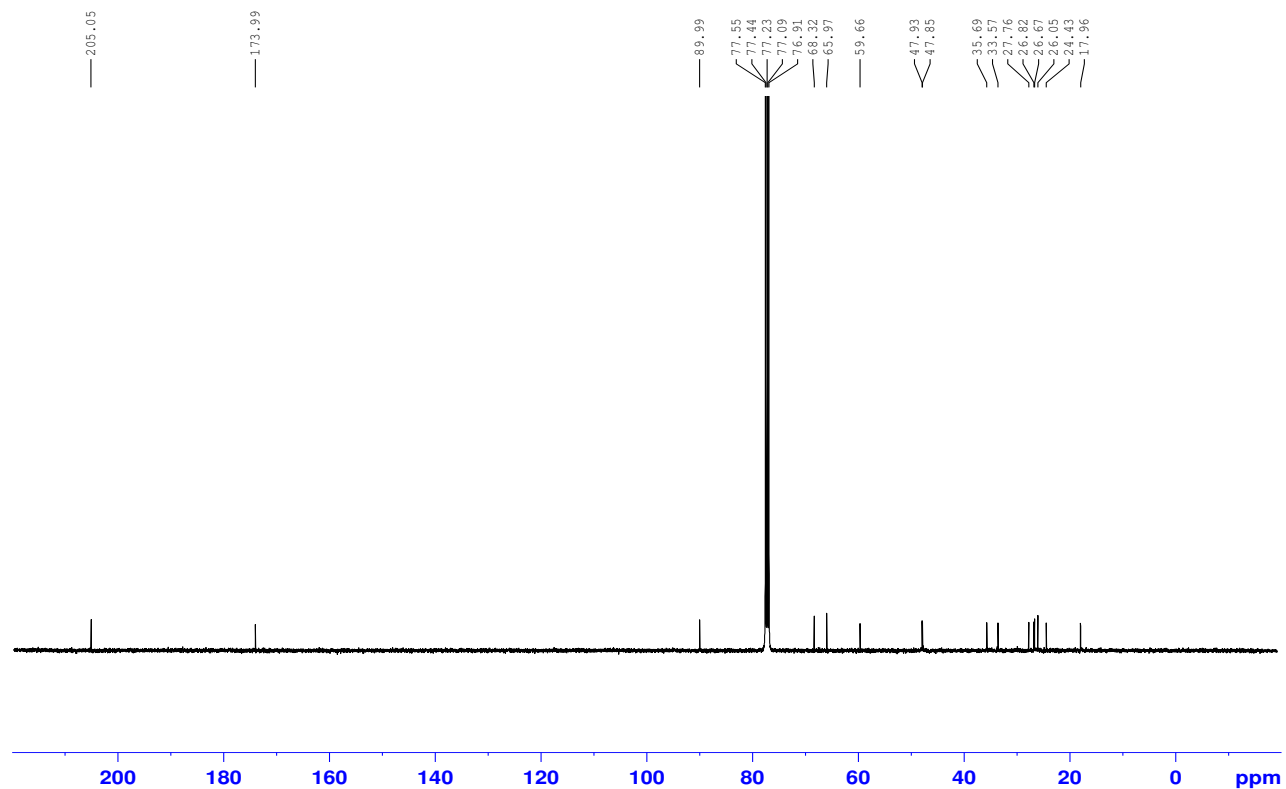



xun-3-66-cis 1H 400B

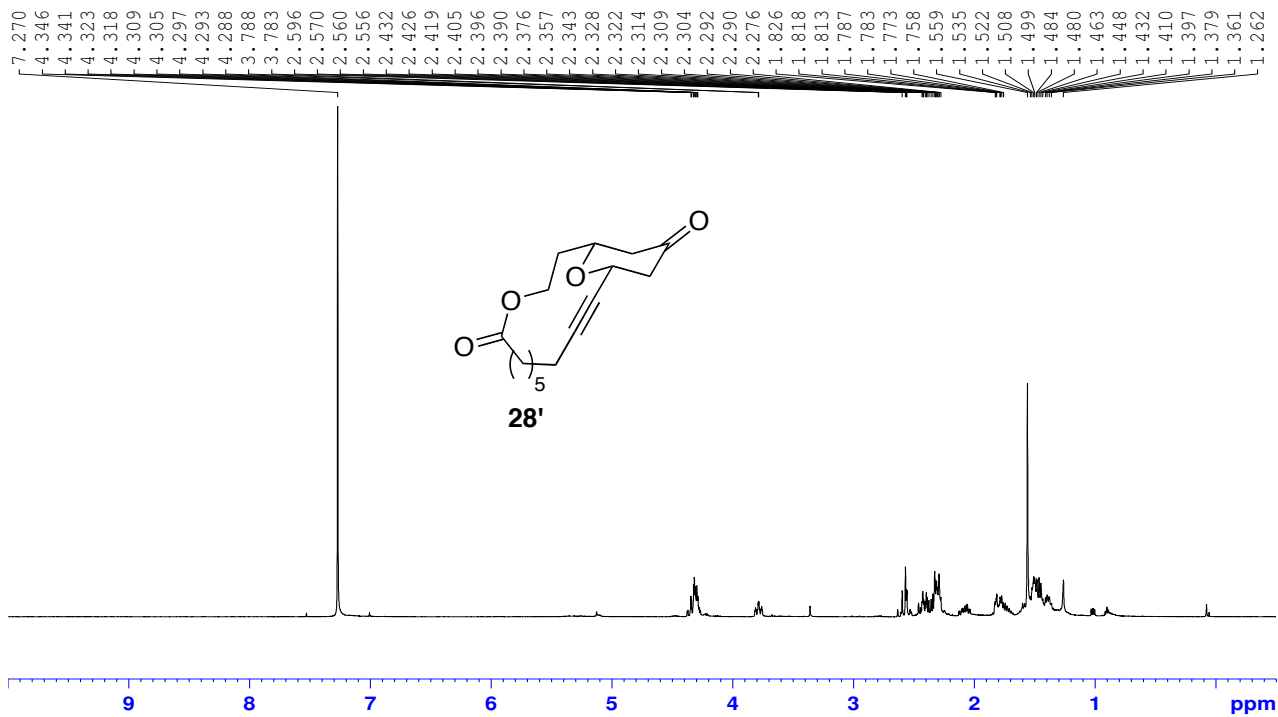

xun-3-66-cis 13C 400B

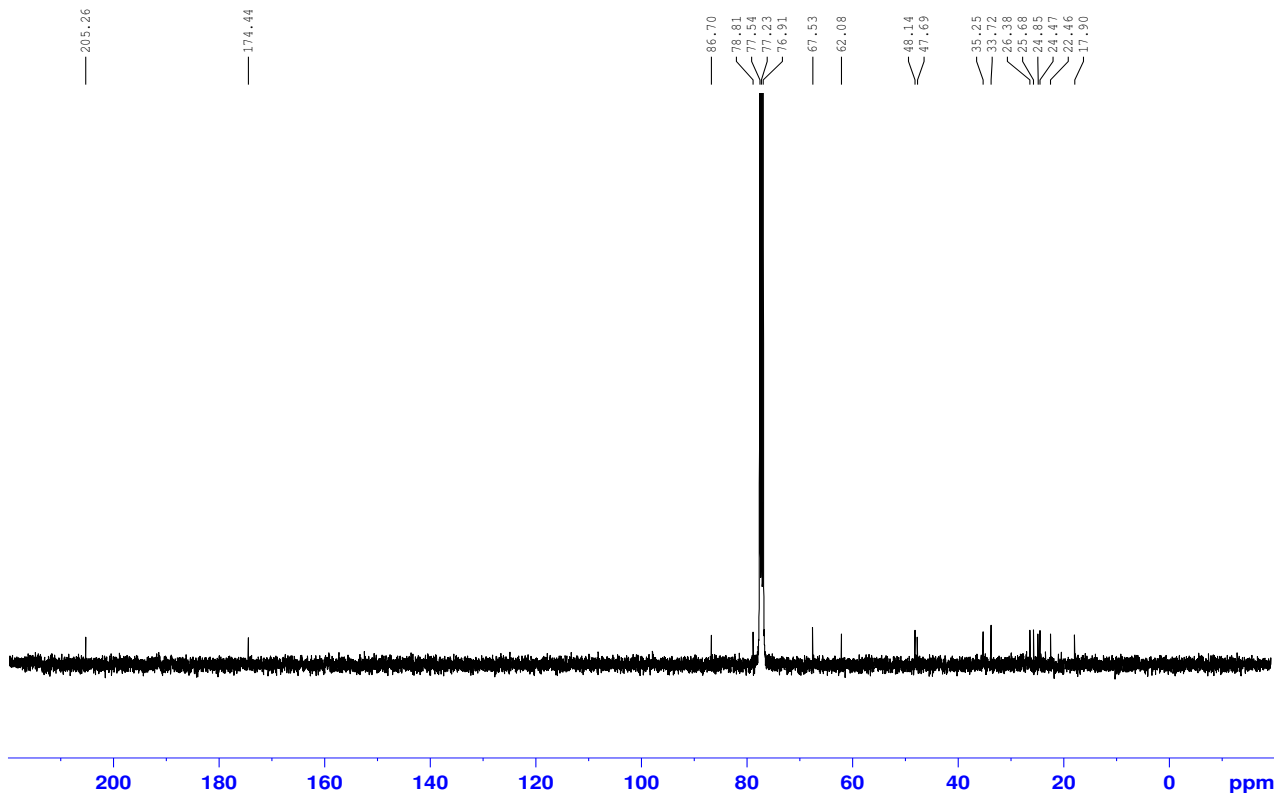

xun-2-269 400B

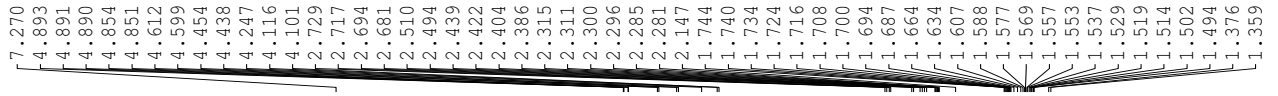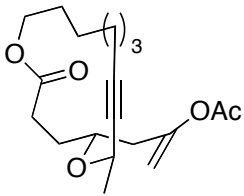

29

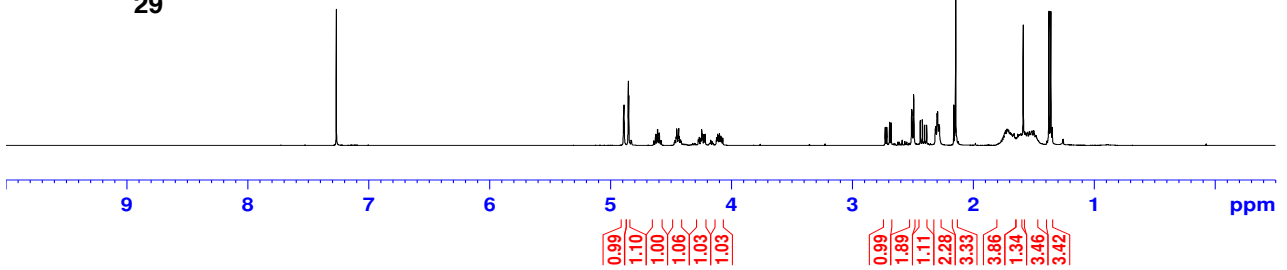

xun-2-269 13C 400B

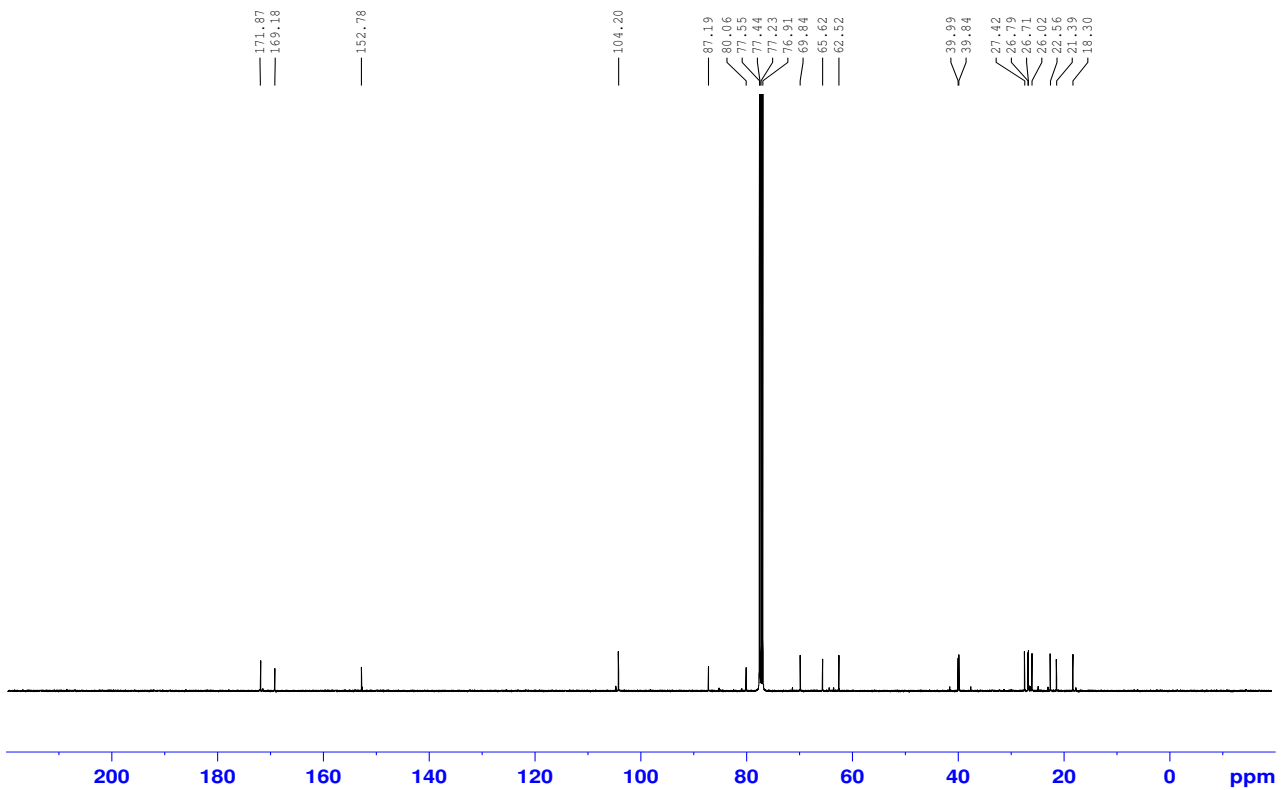

xun-2-270 400B

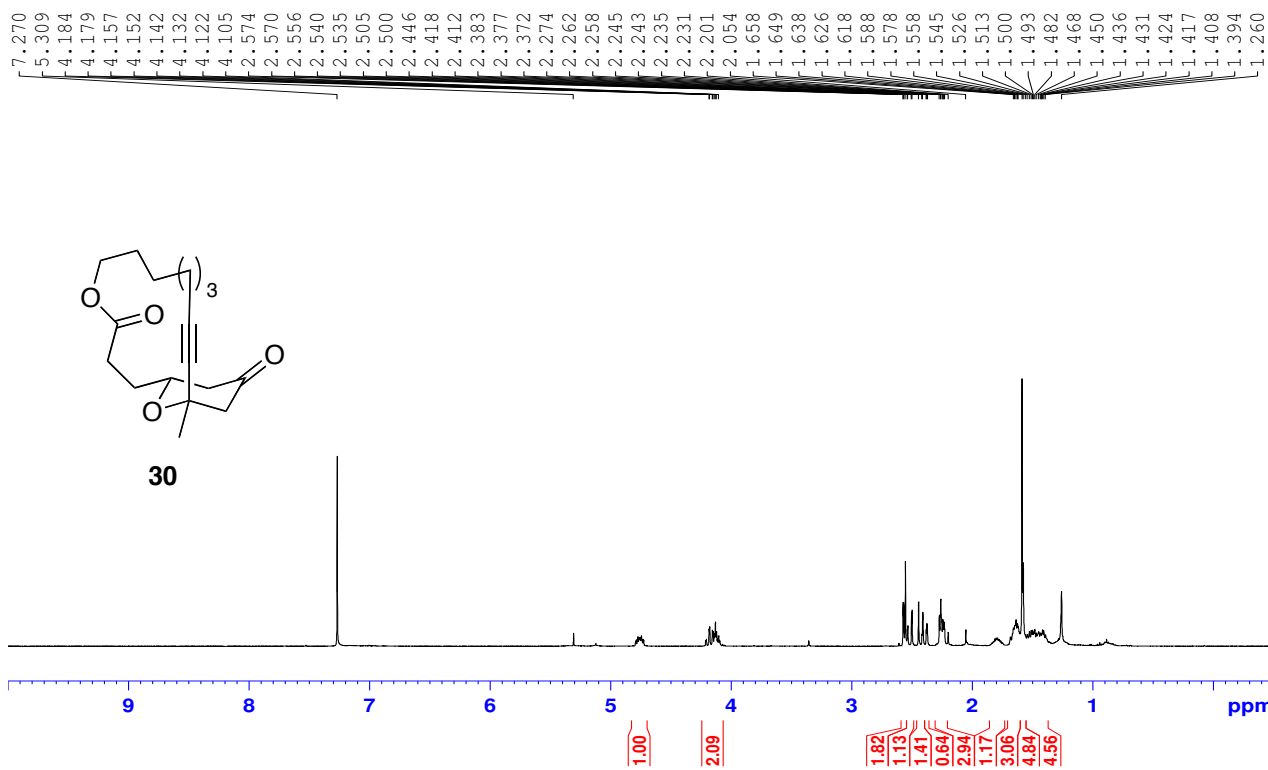

xun-2-270 13C 400B

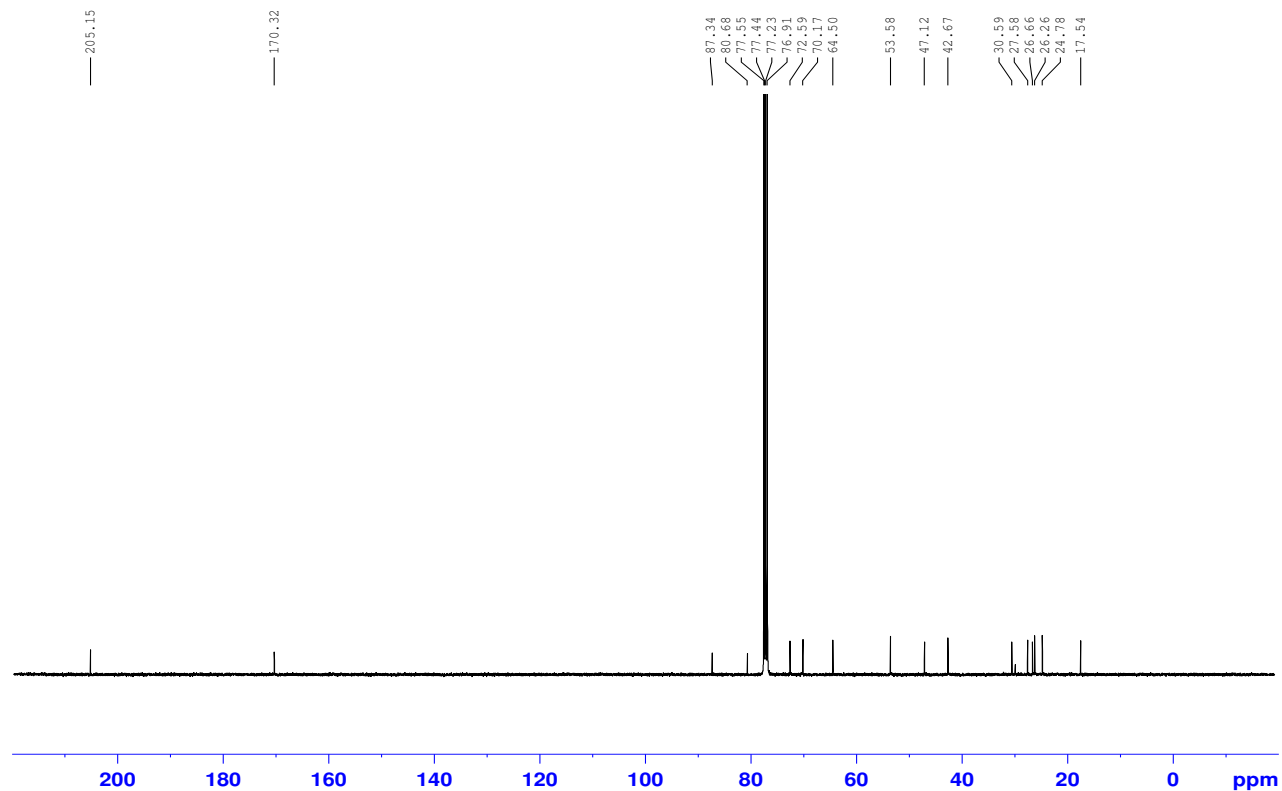

xun-3-201 1H 400B

7.270  
4.877  
4.835  
4.832  
4.508  
4.492  
4.340  
4.321  
4.311  
4.301  
4.292  
4.287  
4.277  
4.190  
4.184  
4.161  
4.155  
2.682  
2.652  
2.643  
2.428  
2.423  
2.417  
2.409  
2.402  
2.393  
2.389  
2.370  
2.295  
2.290  
2.277  
2.265  
2.260  
2.238  
2.230  
2.202  
2.141  
1.696  
1.680  
1.673  
1.668  
1.655  
1.636  
1.620  
1.557  
1.542  
1.535  
1.529  
1.519  
1.511  
1.505  
1.499  
1.494  
1.377  
1.361

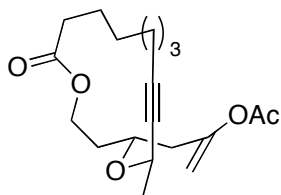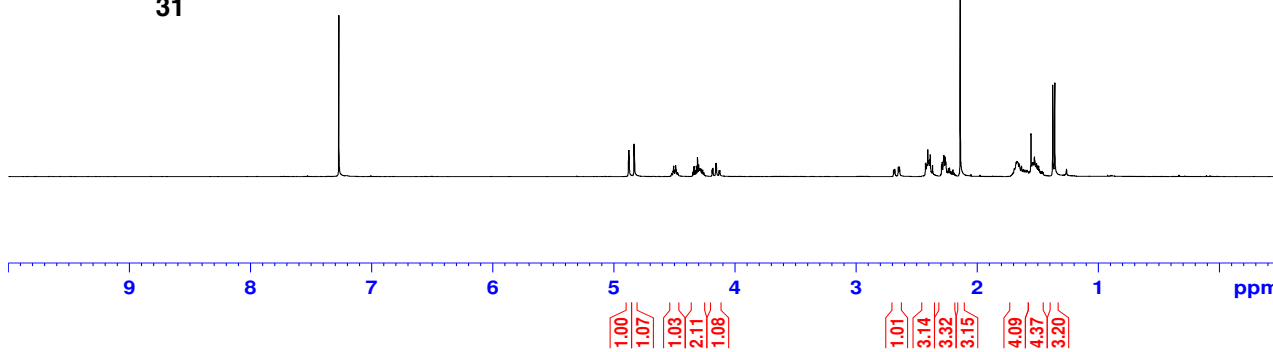

xun-3-201 13C NMR 400B

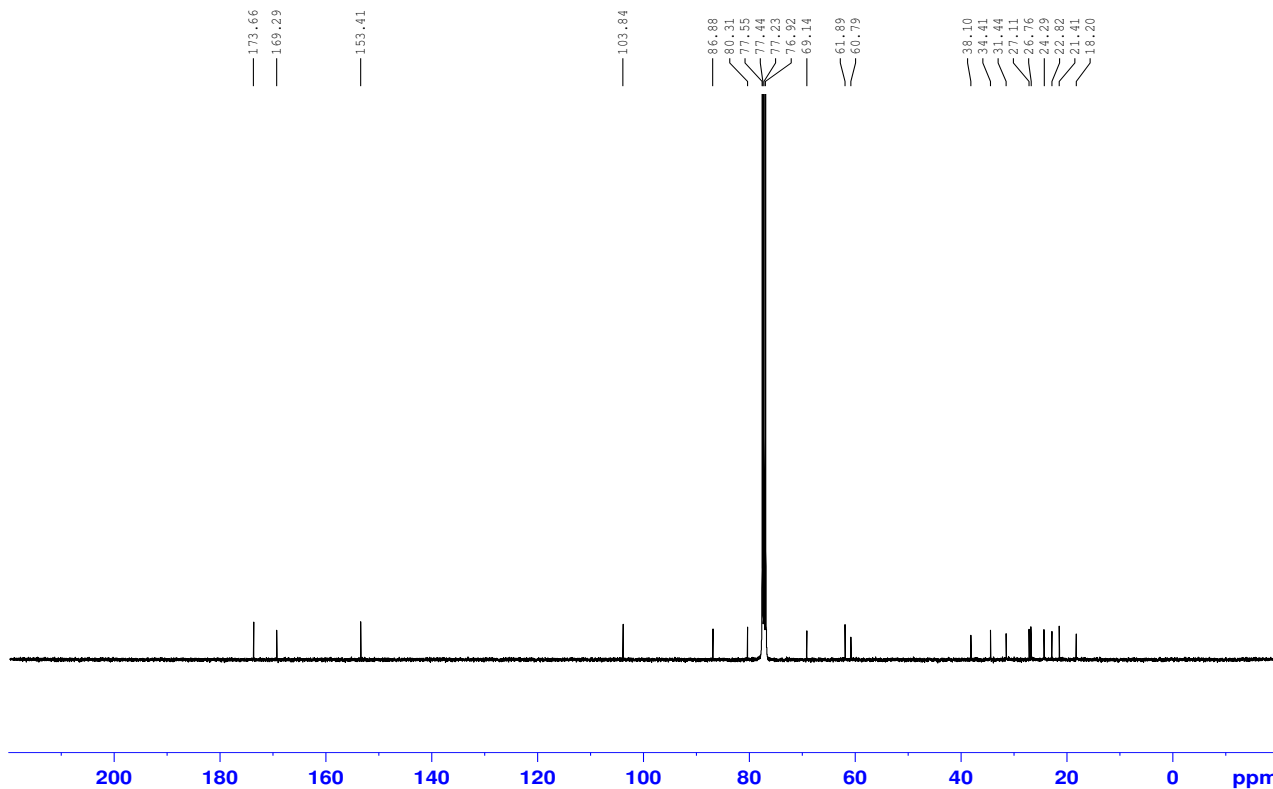

xun-3-202 1H 400B

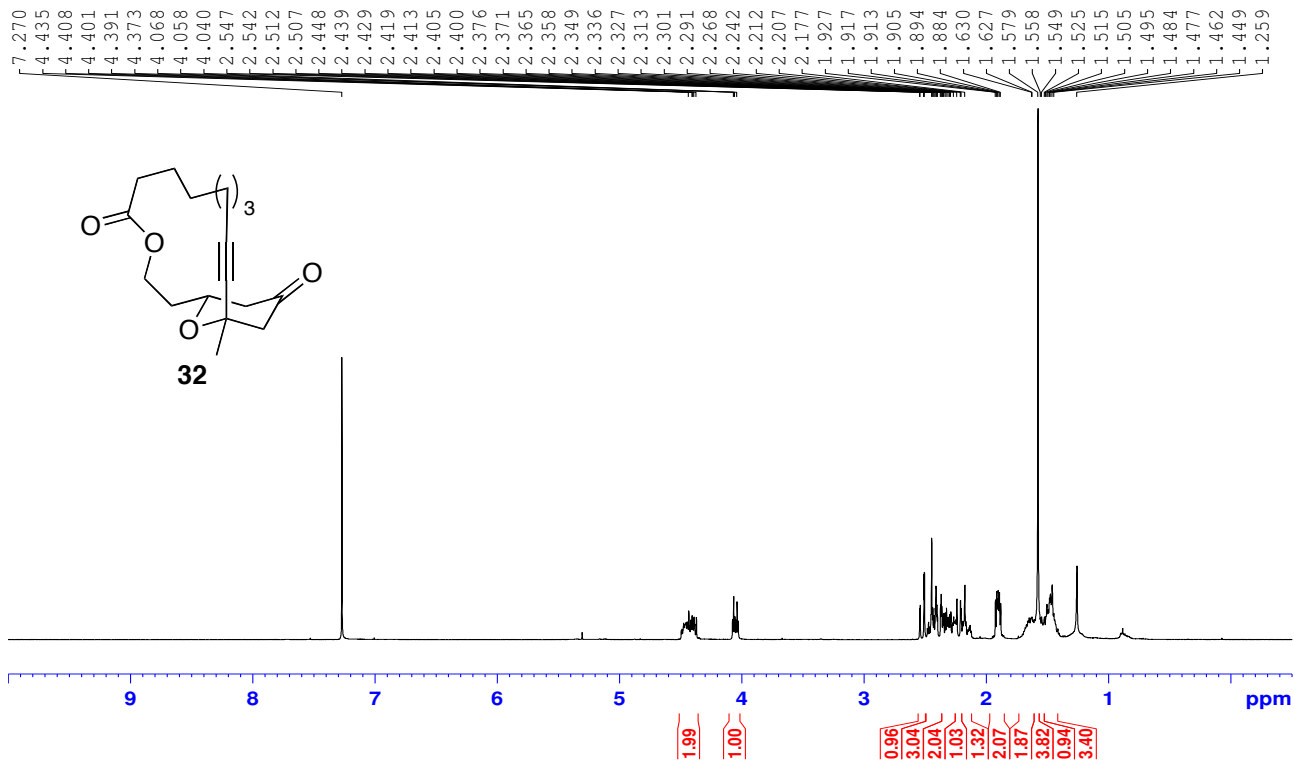

xun-3-202 13C 400B

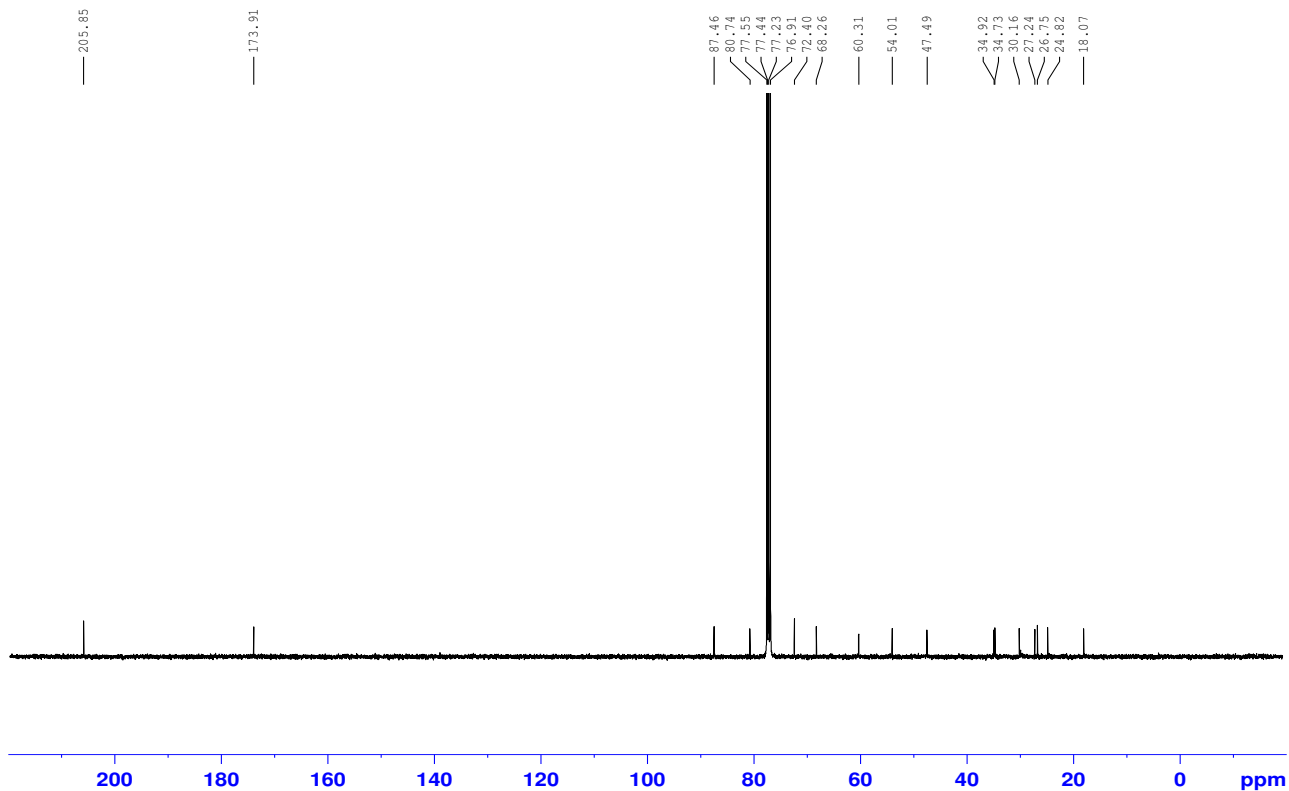

xun-1-80 C6D6

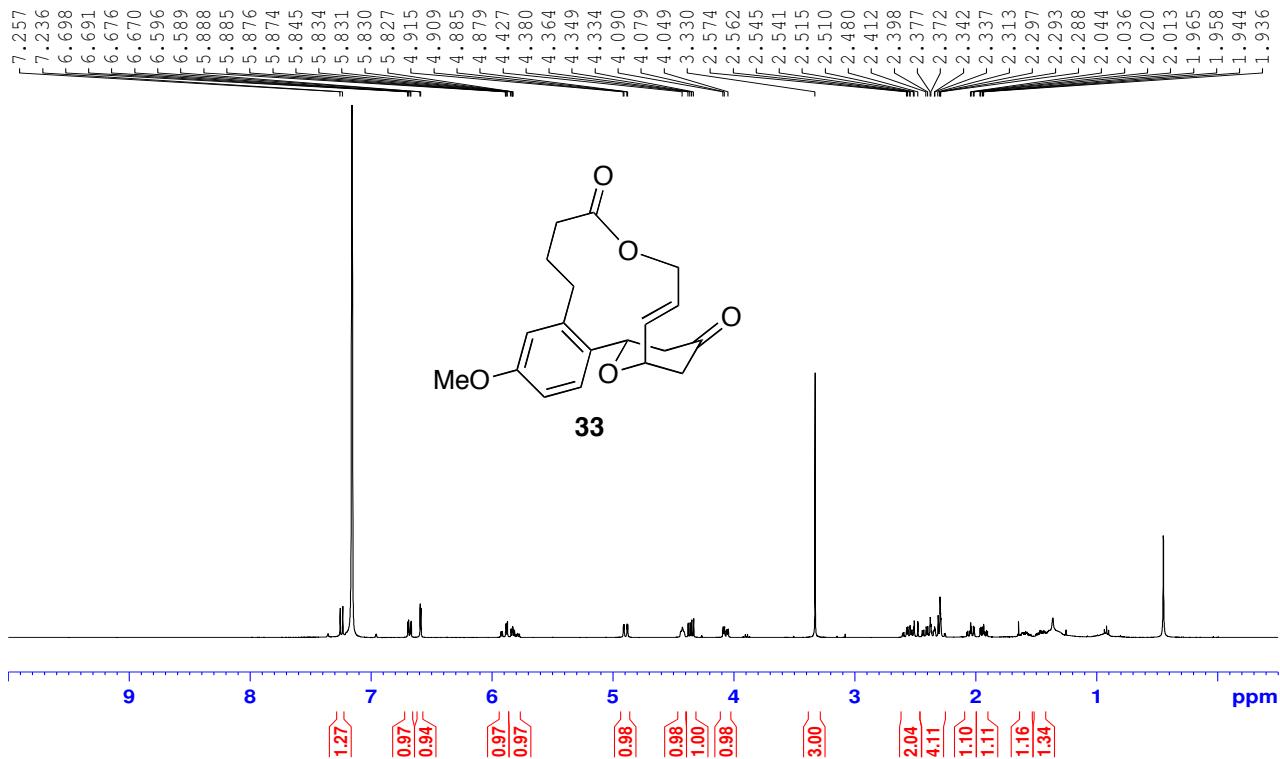

xun-1-80 13C

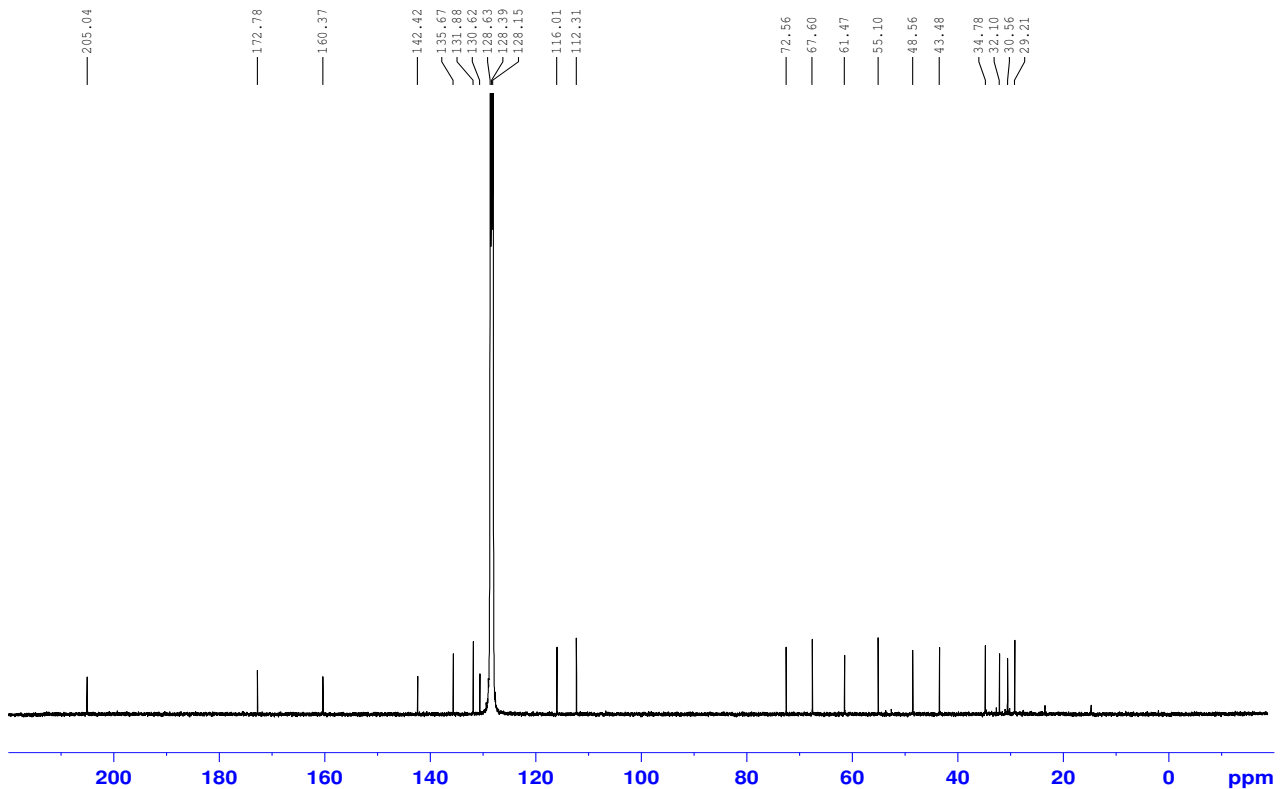

### NOESY of compound 6 (CDCl<sub>3</sub>)

xun-1-30-cis NOESY

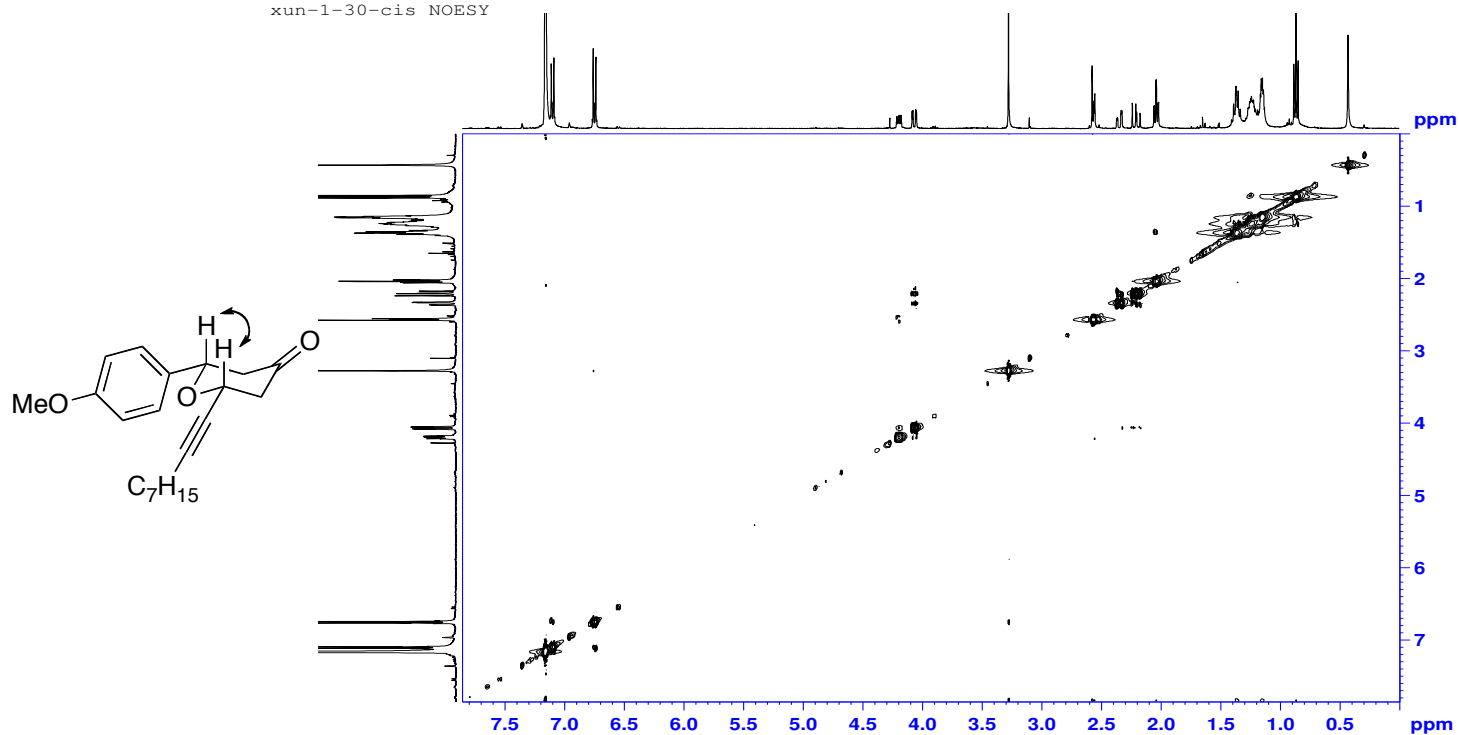

### NOESY of compound 19 (CDCl<sub>3</sub>)

xun-2-224 NOESY 400B 071011

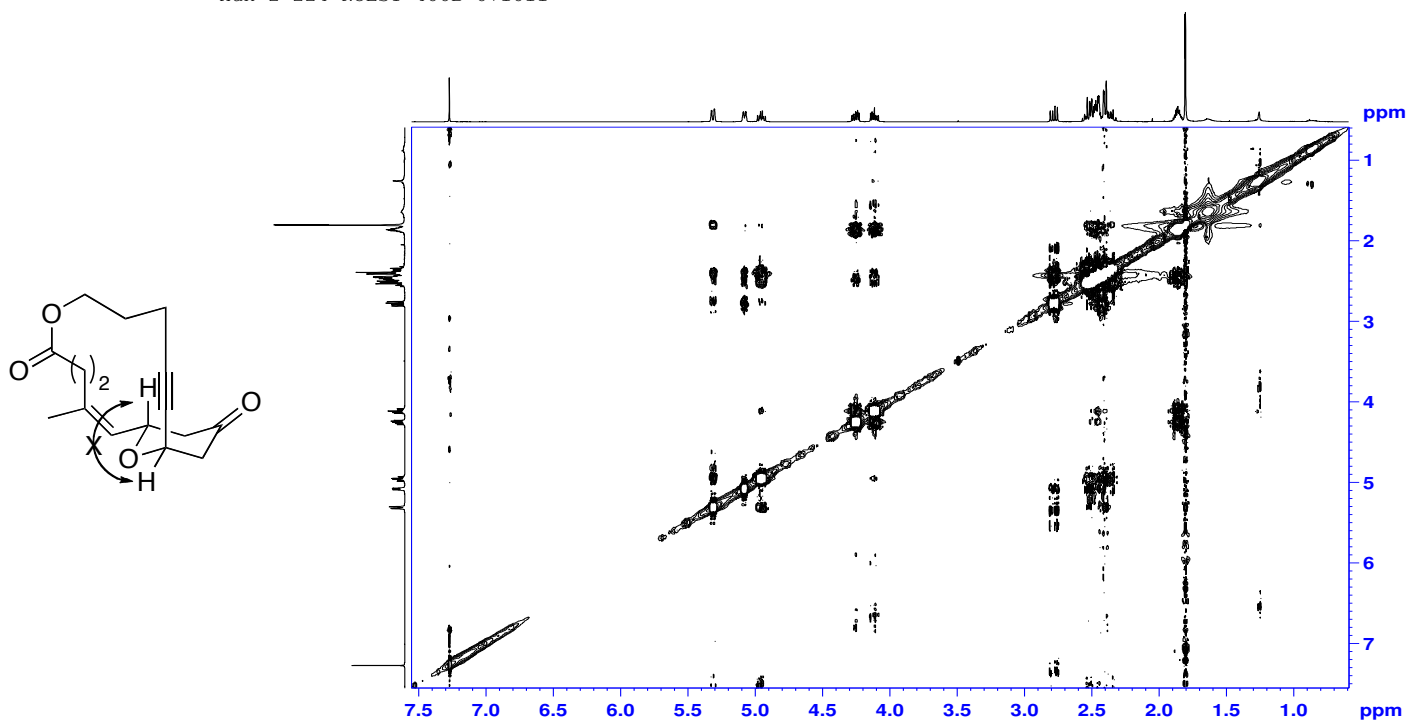

### NOESY of compound 28 (CDCl<sub>3</sub>)

xun-3-66-up trans NOESY 400B

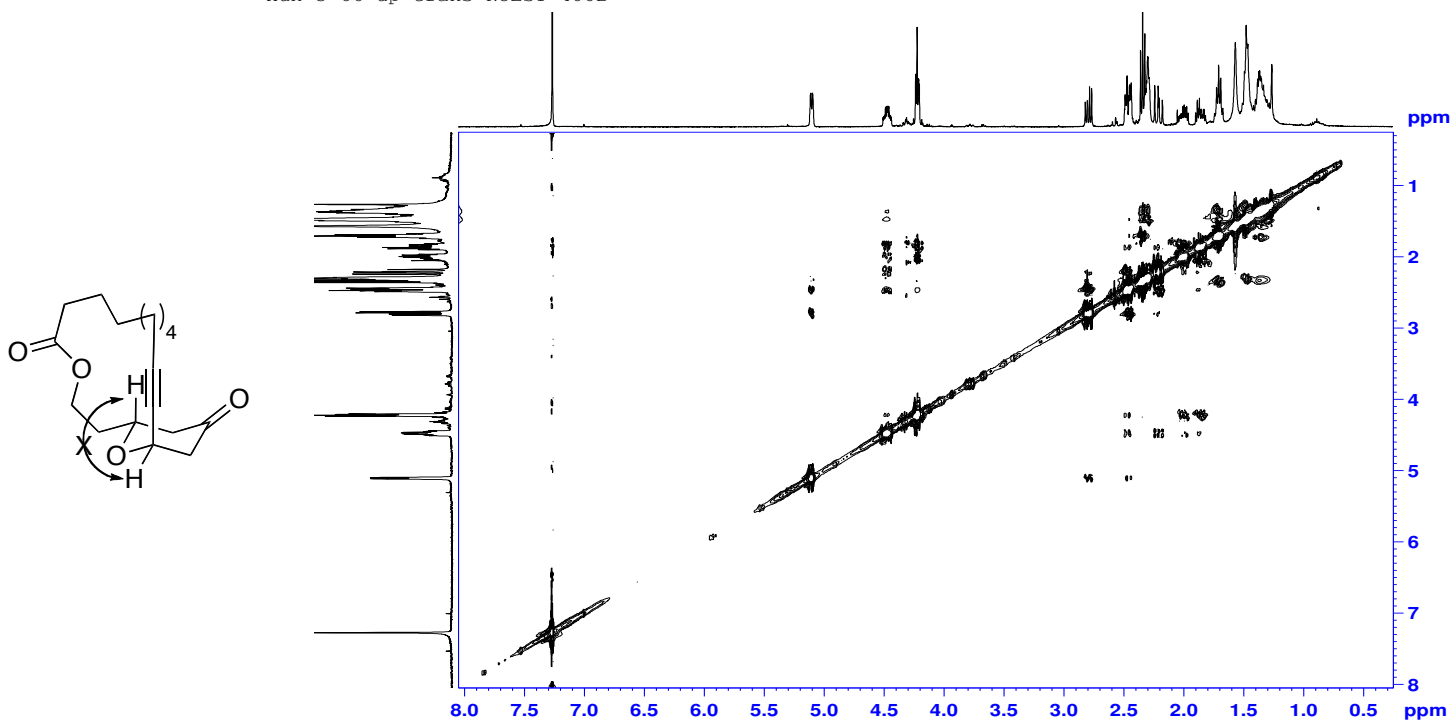

### NOESY of compound 28' (C<sub>6</sub>D<sub>6</sub>)

xun-3-66-cis NOESY C6D6 400B

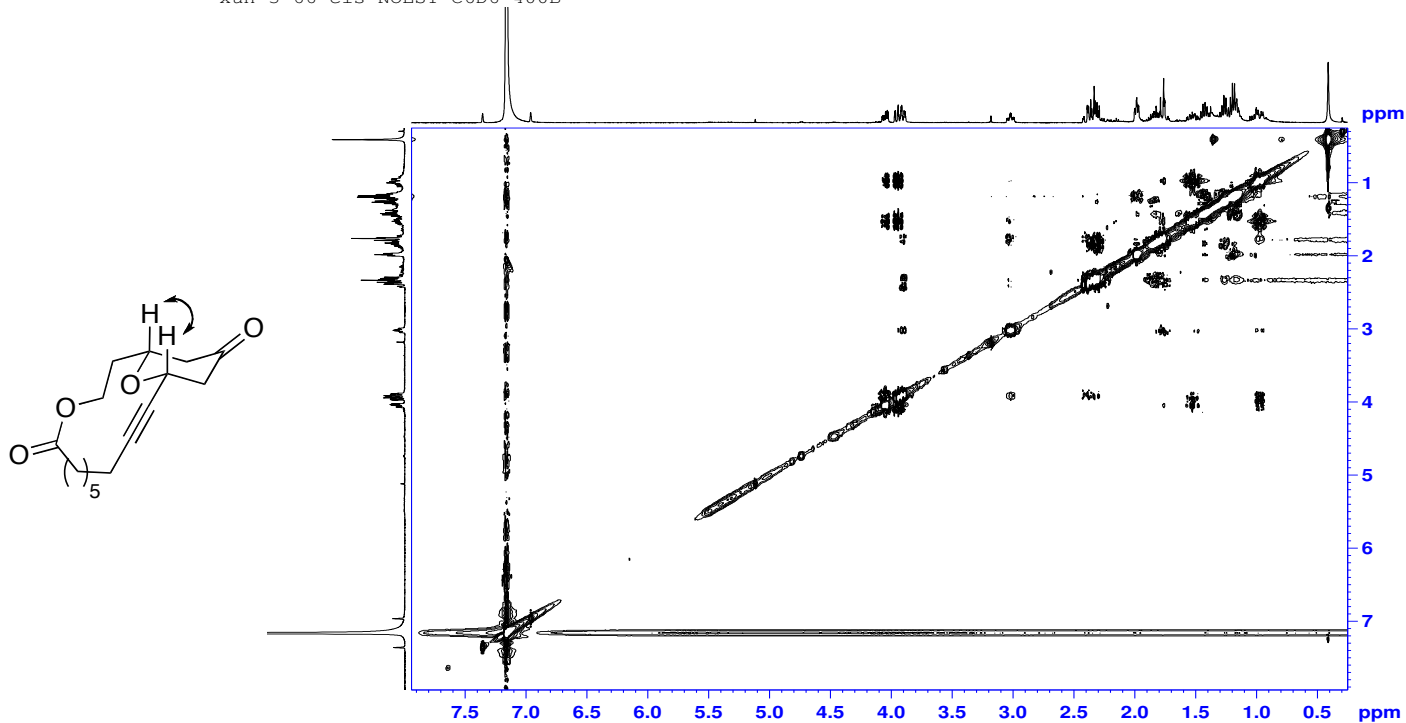



# NOESY of compound 30 (CDCl<sub>3</sub>)

xun-2-270 and xun-3-56 NOESY 400B

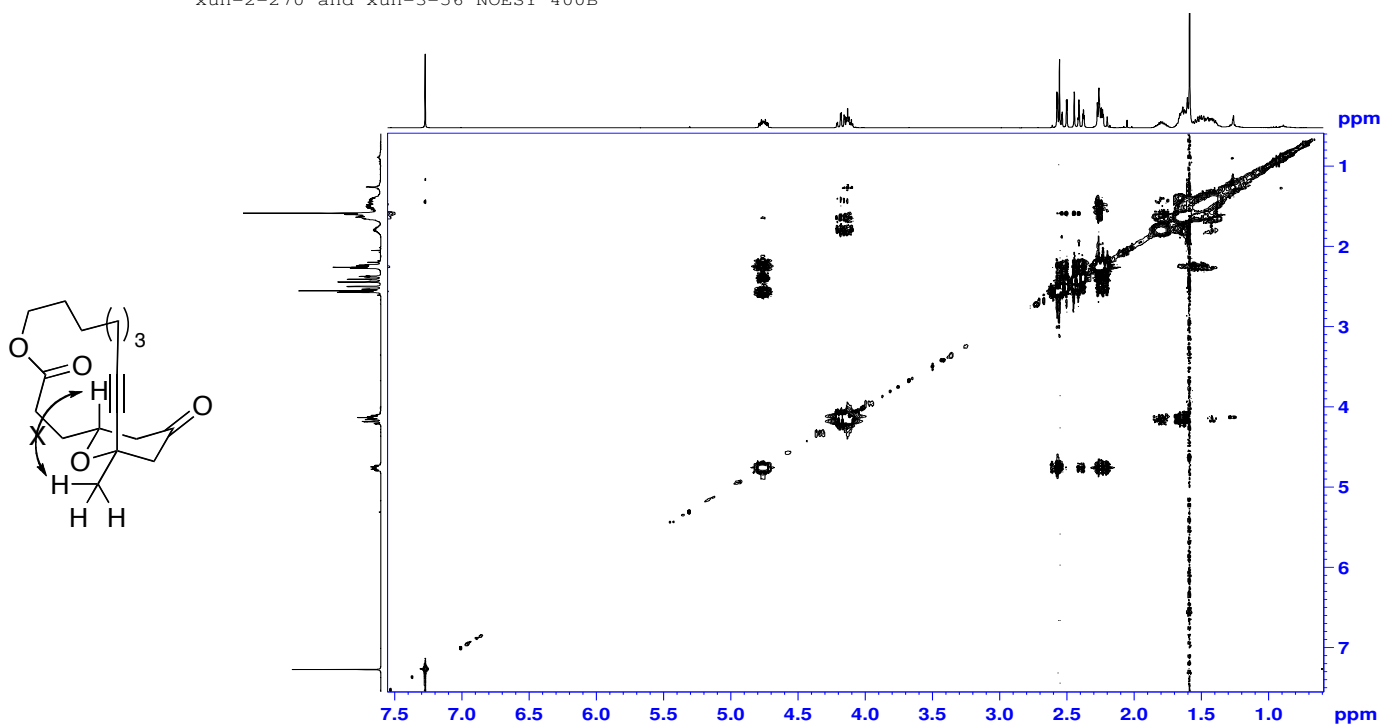

Supplement: NIHMS393416-supplement-2_si_002.pdf [file NIHMS393416-supplement-2_si_002.pdf]
